# Supplementary material for: The organocatalytic synthesis of perfluorophenylsulfides via the thiolation of trimethyl(perfluorophenyl)silanes and thiosulfonates
Source: Royal Society of Chemistry journal article supplement (doi:10.1039/d1ob01350e), 2021-01-01

## Supplementary Information

*for*

### Organocatalytic Synthesis of Perfluorophenylsulfides via Thiolation of Trimethyl(perfluorophenyl)silanes and Thiosulfonates

Jinyun Luo,<sup>a</sup> Muze Lin,<sup>a</sup> Leifang Wu,<sup>b</sup> Zhihua Cai<sup>a\*</sup>, Lin He,<sup>a</sup> Guangfen Du<sup>a\*</sup>

<sup>a</sup>Key Laboratory for Green Processing of Chemical Engineering of Xinjiang Bingtuan, School of Chemistry and Chemical Engineering, Shihezi University, Xinjiang Uygur Autonomous Region, 832000, China. <sup>b</sup>Analysis and Testing Center of Shihezi University, Xinjiang Uygur Autonomous Region, 832000, China.

\* Email: caizhihua1986@sina.cn. duguangfen@shzu.edu.cn

## Table of Contents

|                                                                                 |     |
|---------------------------------------------------------------------------------|-----|
| 1. General Information .....                                                    | S2  |
| 2. Experimental Section.....                                                    | S2  |
| 2.1 General procedure for synthesis of substrates <b>1a-1q</b> .....            | S2  |
| 2.2 General procedure for synthesis of substrates <b>1r-1s</b> .....            | S2  |
| 2.3 General procedure for synthesis of products <b>4a, 4i, 4k, 4m, 4p</b> ..... | S3  |
| 2.4 Procedure for synthesis of products <b>4t</b> .....                         | S3  |
| 2.5 General procedure for synthesis of products.....                            | S3  |
| 2.6 Gram-scale preparation of <b>3a</b> .....                                   | S4  |
| 2.7 Characterization of products.....                                           | S4  |
| 2.8 References.....                                                             | S9  |
| 3. Copies of NMR spectra of products.....                                       | S10 |

## 1. General Information

Unless otherwise indicated, all reactions were conducted under N<sub>2</sub> atmosphere in oven-dried glassware with magnetic stirring bar. All other chemicals were obtained from commercial supplies and used as received without any further purification. Column chromatograph was performed with silica gel (200~300 mesh) and analytical TLC on silica gel 60-F<sub>254</sub>. <sup>1</sup>H, <sup>13</sup>C and <sup>19</sup>F NMR spectra were recorded on a Bruker AVANCE III spectrometer (400 MHz, 100 MHz and 376 MHz, respectively), Chemical shifts are reported parts per million (ppm) referenced to CDCl<sub>3</sub> (δ 7.26 ppm), tetramethylsilane (TMS, δ 0.00 ppm) for <sup>1</sup>H NMR and <sup>13</sup>C NMR. High-resolution mass spectra (HRMS) were obtained on a Q Exactive mass spectrometry equipped with an APCI source from Thermo Scientific.

## 2. Experimental Section

### 2.1 General procedure for synthesis of substrates 1a-1q:

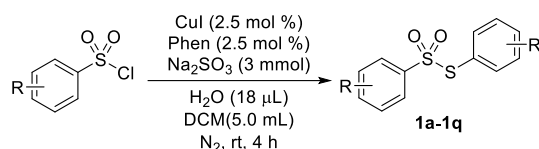

Substrates **1a-1q** were prepared according to the known literature.<sup>[1]</sup> CuI (2.5 mol%) and 1, 10-Phen H<sub>2</sub>O (2.5 mol%) were added to a mixture of arenesulfonyl chloride (1 mmol), sodium sulfite (3 mmol) and H<sub>2</sub>O (18 μL) in DCM (5 mL), then the mixture was stirred at room temperature for 4 h under a nitrogen atmosphere (monitored by TLC). After completion of the reaction, the mixture was diluted with CH<sub>2</sub>Cl<sub>2</sub> and washed with water, the organic phase was dried with anhydrous Na<sub>2</sub>SO<sub>4</sub>. The solvent was removed under vacuum and the residue was purified by flash column chromatography on silica gel (200–300 mesh) using petroleum ether and CH<sub>2</sub>Cl<sub>2</sub> (v/v = 1:1) as the eluent to give thiosulfonate.

### 2.2 General procedure for synthesis of substrates 1r-1s:

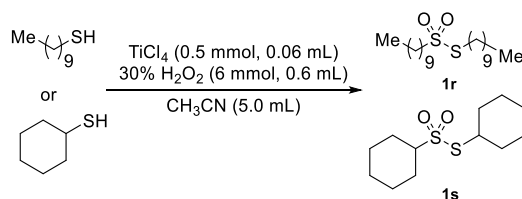

Substrates **1r** and **1s** were prepared according to the known literature.<sup>[2]</sup> To a mixture of thiol (2 mmol) and 30% H<sub>2</sub>O<sub>2</sub> (6 mmol, 0.6 mL) in CH<sub>3</sub>CN (5 mL), TiCl<sub>4</sub> (0.5 mmol, 0.06 mL) was added. The mixture was then reacted at room temperature. After consumption of the starting material detected by TLC, the mixture was poured into H<sub>2</sub>O (15 mL). The aqueous phase was extracted with EtOAc (2×5 mL), the combination of organic phase was subsequently dried over anhydrous Na<sub>2</sub>SO<sub>4</sub>. The solvent was removed under vacuum affording crude product which was purified by

flash column chromatography on silica gel (200–300 mesh) using a mixture of petroleum ether and EtOAc (v/v = 10:1) as eluent to obtain clean thiosulfonate.

### 2.3 General procedure for synthesis of substrates **4a**, **4i**, **4k**, **4m**, **4p**:

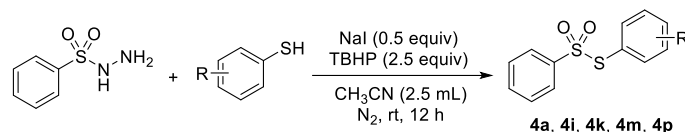

Substrates **4a**, **4i**, **4k**, **4m**, **4p** were prepared according to the known literature.<sup>[3]</sup> To a mixture of sulfonyl hydrazide (0.6 mmol), thiol (0.4 mmol), sodium iodide (0.2 mmol) in CH<sub>3</sub>CN (2.5 mL) was added TBHP (1.0 mmol). The reaction mixture was then stirred at room temperature for 12 h. After removal of the solvent, the residue was subsequently purified by flash column chromatography on silica gel (200–300 mesh) using ethyl acetate in petroleum ether (v/v = 1:1) as the eluent to afford pure thiosulfonate.

### 2.4 Procedure for synthesis of substrates **4t**:

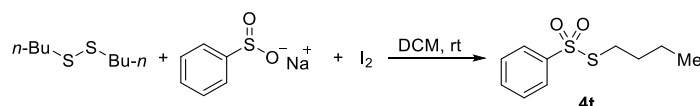

To a dried 50 mL bottom flask equipped with a magnetic stirring bar, was charged with dibutyl disulfide (0.5 mmol), sodium benzenesulfinate (1.6 mmol), iodine (1.0 mmol) and DCM (10 mL). The mixture was stirred for 22 h at room temperature. Then, Na<sub>2</sub>S<sub>2</sub>O<sub>3</sub> solution (0.10 M) was added to quench the excess of iodine. After separation of reaction mixture, the organic phase was washed with brine and dried. The organic solvent was removed under vacuum to give *S*-butyl benzenesulfonothioate **4t** as a yellow oil.<sup>[4]</sup>

### 2.5 General procedure for synthesis of products:

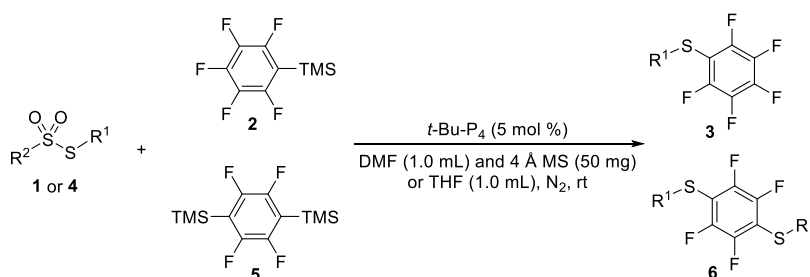

To an oven-dried 10 mL Schlenk tube was added thiosulfonate **1** or **4** (0.2 mmol), then the tube was evacuated under vacuum and charged with N<sub>2</sub>. Under N<sub>2</sub> atmosphere, the anhydrous THF or DMF (1.0 mL) in combination with 4 Å MS (50 mg), trimethyl(perfluorophenyl)silane **2** or **5** (0.1 mmol) and *t*-Bu-P<sub>4</sub> (5 mol %) was added successively with stirring. After completion of the reaction, the solvent was removed under vacuum and the crude product was purified by flash column chromatography on silica gel (200–300 mesh, petroleum ether as the eluent) to afford clean product **3** and **6**.

## 2.6 Gram-scale preparation of 3a:

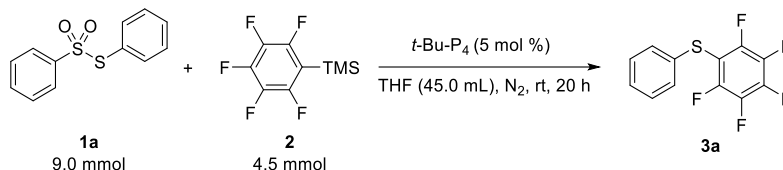

To an oven-dried 100 mL three-necked flask was added thiosulfonate **1a** (9.0 mmol, 2.253 g), then the reaction flask was evacuated under vacuum and charged with N<sub>2</sub>. Under N<sub>2</sub> atmosphere, the anhydrous THF (45.0 mL), trimethyl(pentafluorophenyl)silane **2** (4.5 mmol, 1.085 g), *t*-Bu-P<sub>4</sub> (5 mol%, 0.143 g) was added successively with stirring. After completion of the reaction, the mixture was diluted with EtOAc and washed with water. The organic layer was separated, dried and filtered which was then removed under vacuum. The residue was purified by flash column chromatography on silica gel (200–300 mesh, petroleum ether as the eluent) to afford clean product **3a** (1.156 g, 93% yield).

## 2.7 Characterization of products:

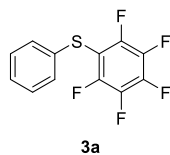

**(perfluorophenyl)(phenyl)sulfane (3a)** (known compound)<sup>[5]</sup>: white solid (26.8 mg, 97% yield); mp: 48–49 °C; <sup>1</sup>H NMR (400 MHz, CDCl<sub>3</sub>) δ 7.38–7.32 (m, 2H), 7.32–7.26 (m, 3H); <sup>13</sup>C NMR (100 MHz, CDCl<sub>3</sub>) δ 149.1–148.8 (m), 146.6–146.5 (m), 143.6–143.3 (m), 141.1–140.7 (m), 139.5–139.0 (m), 136.9–136.5 (m), 133.1, 130.7, 129.6, 128.1, 109.5–108.8 (m); <sup>19</sup>F NMR (376 MHz, CDCl<sub>3</sub>) δ -131.61– -131.74 (m, 2F), -151.25– -151.40 (m, 1F), -160.33– -160.51 (m, 2F); IR (KBr, thin film): 3062, 2927, 1638, 1513, 1488, 1265, 1095, 981, 862, 741 cm<sup>-1</sup>.

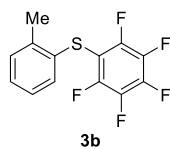

**(perfluorophenyl)(o-tolyl)sulfane (3b)** (known compound)<sup>[5]</sup>: colorless liquid (18.9 mg, 65% yield); <sup>1</sup>H NMR (400 MHz, CDCl<sub>3</sub>) δ 7.23–7.14 (m, 3H), 7.13–7.07 (m, 1H), 2.47 (s, 3H); <sup>13</sup>C NMR (100 MHz, CDCl<sub>3</sub>) δ 148.9–148.6 (m), 146.4–146.1 (m), 143.3–142.8 (m), 140.9–140.3 (m), 139.3–138.9 (m), 136.8–136.3 (m), 131.1, 130.8, 128.2, 126.9, 109.3–108.6 (m), 20.5; <sup>19</sup>F NMR (376 MHz, CDCl<sub>3</sub>) δ -131.79– -131.91 (m, 2F), -151.75– -151.89 (m, 1F), -160.44– -160.62 (m, 2F); IR (KBr, thin film): 3064, 2921, 1637, 1513, 1490, 1144, 1094, 981, 859, 748 cm<sup>-1</sup>.

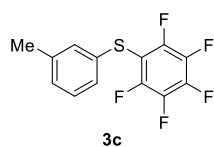

**(perfluorophenyl)(m-tolyl)sulfane (3c)** (known compound)<sup>[5]</sup>: colorless liquid (21.5 mg, 74% yield); <sup>1</sup>H NMR (400 MHz, CDCl<sub>3</sub>) δ 7.22–7.11 (m, 3H), 7.08 (m, 1H), 2.31 (s, 3H); <sup>13</sup>C NMR (100 MHz, CDCl<sub>3</sub>) δ 148.9–148.6 (m), 146.5–146.2 (m), 143.5–143.0 (m), 140.9–140.5 (m), 139.4, 139.3–138.8 (m), 136.8–136.3 (m), 132.6, 131.2, 129.2, 128.9, 127.7, 109.4–108.8 (m), 21.3; <sup>19</sup>F NMR (376 MHz, CDCl<sub>3</sub>) δ -131.63– -131.76 (m, 2F), -151.44– -151.57 (m, 1F), -160.42– -160.59 (m, 2F); IR (KBr, thin film): 3065, 2925, 1637, 1513, 1488, 1379, 1092, 981, 862, 775 cm<sup>-1</sup>.

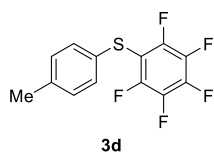

**(perfluorophenyl)(p-tolyl)sulfane (3d)** (known compound)<sup>[5]</sup>: white solid (23.8 mg, 82% yield); mp: 39–40 °C; <sup>1</sup>H NMR (400 MHz, CDCl<sub>3</sub>) δ 7.31 (d, *J* = 8.4 Hz, 2H), 7.11 (d, *J* = 8.0 Hz, 2H), 2.33 (s, 3H); <sup>13</sup>C NMR (100 MHz, CDCl<sub>3</sub>) δ 148.8–148.7 (m), 146.4–146.0 (m), 143.3–142.9 (m), 140.8–140.3 (m), 139.3–138.8 (m), 138.5, 136.7–136.3 (m), 131.5, 130.2, 129.2, 110.1–109.5 (m), 21.1; <sup>19</sup>F NMR (376 MHz, CDCl<sub>3</sub>) δ -132.01– -132.14 (m, 2F), -151.86– -152.00 (m, 1F), -160.58– -160.75 (m, 2F); IR (KBr, thin film): 3052, 2926, 1637, 1512, 1488, 1290, 1095, 981, 860, 750 cm<sup>-1</sup>.

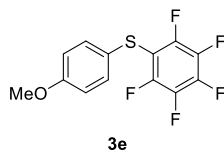

**(4-methoxyphenyl)(perfluorophenyl)sulfane (3e)** (known compound)<sup>[5]</sup>: colorless liquid (26.6 mg, 87% yield); <sup>1</sup>H NMR (400 MHz, CDCl<sub>3</sub>) δ 7.44 (d, *J* = 8.8 Hz, 2H), 6.90–6.74 (m, 2H), 3.79 (s, 3H); <sup>13</sup>C NMR (100 MHz, CDCl<sub>3</sub>) δ 160.3, 148.6–148.3, 146.2–145.9 (m), 143.2–142.8 (m), 140.6–140.2 (m), 139.2–138.8 (m), 136.7–136.2 (m), 134.7, 122.8, 115.0, 111.1–110.5 (m), 55.4; <sup>19</sup>F NMR (376 MHz, CDCl<sub>3</sub>) δ -132.66– -132.77 (m, 2F), -152.38– -152.52 (m, 1F), -160.75– -160.92 (m, 2F); IR (KBr, thin film): 3109, 2926, 1629, 1515, 1491, 1211, 1089, 991, 854, 709 cm<sup>-1</sup>.

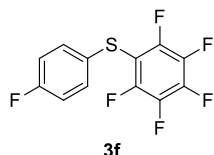

**(4-fluorophenyl)(perfluorophenyl)sulfane (3f)**: colorless liquid (21.8 mg, 74% yield); <sup>1</sup>H NMR (400 MHz, CDCl<sub>3</sub>) δ 7.48–7.40 (m, 2H), 7.06–6.97 (m, 2H); <sup>13</sup>C NMR (100 MHz, CDCl<sub>3</sub>) δ 164.1, 161.6, 148.8–148.4 (m), 146.3–145.9 (m), 143.6–142.9 (m), 141.0–140.5 (m), 139.3–138.9 (m), 136.8–136.3 (m), 134.1, 134.0, 131.4, 131.3, 127.8, 116.8, 116.5, 116.4, 116.2, 109.9–109.3 (m); <sup>19</sup>F NMR (376 MHz, CDCl<sub>3</sub>) δ -132.11– -132.23 (m, 2F), -151.21– -151.35 (m, 1F), -160.23– -160.40 (m, 2F); IR (KBr, thin film): 3184, 2922, 1887, 1513, 1488, 1233, 1095, 980, 860, 742 cm<sup>-1</sup>; HRMS (APCI) *m/z*: [M+H]<sup>+</sup> Calcd. for C<sub>12</sub>H<sub>5</sub>F<sub>6</sub>S, 295.0016, Found, 295.0013.

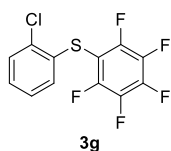

**(2-chlorophenyl)(perfluorophenyl)sulfane (3g)**: white solid (24.8 mg, 80% yield); mp: 54–55 °C; <sup>1</sup>H NMR (400 MHz, CDCl<sub>3</sub>) δ 7.40 (dd, *J* = 7.6, 1.6 Hz, 1H), 7.24–7.14 (m, 2H), 7.08–7.03 (m, 1H); <sup>13</sup>C NMR (100 MHz, CDCl<sub>3</sub>) δ 149.2–148.8 (m), 146.7–146.4 (m), 144.0–143.6 (m), 139.6–139.1 (m), 137.0–136.6 (m), 134.1, 132.2, 130.4, 130.2, 128.8, 127.7, 107.6–106.9 (m); <sup>19</sup>F NMR (376 MHz, CDCl<sub>3</sub>) δ -136.03– -136.17 (m, 2F), -155.40– -155.54 (m, 1F), -165.0 – -165.25 (m, 2F); IR (KBr, thin film): 3071, 2919, 1636, 1515, 1491, 1286, 1097, 983, 861, 748 cm<sup>-1</sup>; HRMS (APCI) *m/z*: [M+H]<sup>+</sup> Calcd. for C<sub>12</sub>H<sub>5</sub>ClF<sub>5</sub>S, 310.9721, Found, 310.9716.

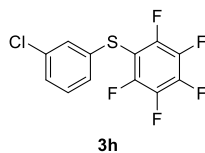

**(3-chlorophenyl)(perfluorophenyl)sulfane (3h)** : colorless liquid (24.5 mg, 79% yield); <sup>1</sup>H NMR (400 MHz, CDCl<sub>3</sub>) δ 7.29 (d, *J* = 1.6 Hz, 1H), 7.25–7.18 (m, 3H); <sup>13</sup>C NMR (100 MHz, CDCl<sub>3</sub>) δ 149.0–148.7 (m), 146.5–146.2 (m), 144.0–143.5 (m), 141.4–140.9 (m), 139.4–139.0 (m), 136.9–136.4 (m), 135.2, 134.9, 130.4, 129.9, 128.3, 128.2, 108.2–107.7; <sup>19</sup>F NMR (376 MHz, CDCl<sub>3</sub>) δ -131.22– -131.34 (m, 2F), -150.10– -150.24 (m, 1F), -159.75– -159.92 (m, 2F); IR (KBr, thin film): 3064, 2926,

1636, 1515, 1491, 1286, 1089, 983, 869, 778 cm<sup>-1</sup>; HRMS (APCI) *m/z*: [M-H]<sup>-</sup> Calcd. for C<sub>12</sub>H<sub>3</sub>ClF<sub>5</sub>S, 308.9569, Found, 308.9569.

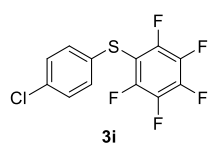

**(4-chlorophenyl)(perfluorophenyl)sulfane (3i)** (known compound)<sup>[6]</sup>: white solid (26.0 mg, 84% yield); mp: 45–46 °C; <sup>1</sup>H NMR (400 MHz, CDCl<sub>3</sub>) δ 7.34–7.24 (m, 4H); <sup>13</sup>C NMR (100 MHz, CDCl<sub>3</sub>) δ 148.9–148.5 (m), 146.4–146.1 (m), 143.7–143.2 (m), 141.1–140.7 (m), 139.4–138.9 (m), 136.8–136.4 (m), 134.4, 132.2, 131.3, 129.6, 109.0–108.4 (m); <sup>19</sup>F NMR (376 MHz, CDCl<sub>3</sub>) δ -131.63– -131.76 (m, 2F), -150.65– -150.79 (m, 1F), -159.98– -160.16 (m, 2F); IR (KBr, thin film): 3042, 2924, 1638, 1512, 1488, 1292, 1095, 981, 861, 745 cm<sup>-1</sup>.

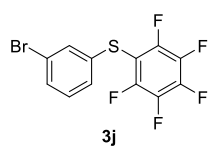

**(3-bromophenyl)(perfluorophenyl)sulfane (3j)**: colorless liquid (31.2 mg, 88% yield); <sup>1</sup>H NMR (400 MHz, CDCl<sub>3</sub>) δ 7.46 (t, *J* = 1.6 Hz, 2H), 7.43–7.36 (m, 2H), 7.26 (d, *J* = 7.2 Hz, 2H), 7.20–7.13 (m, 2H); <sup>13</sup>C NMR (100 MHz, CDCl<sub>3</sub>) δ 149.0–148.7 (m), 146.5–146.2 (m), 143.9–143.5 (m), 141.4–140.9 (m), 139.4–139.0 (m), 136.9–136.4 (m), 135.1, 132.7, 131.1, 130.7, 128.8, 123.2, 108.3–107.7 (m); <sup>19</sup>F NMR (376 MHz, CDCl<sub>3</sub>) δ -131.22– -131.34 (m, 2F), -151.11– -151.25 (m, 1F), -159.76– -159.92 (m, 2F); IR (KBr, thin film): 3126, 2924, 1638, 1513, 1492, 1291, 1093, 981, 863, 750 cm<sup>-1</sup>; HRMS (APCI) *m/z*: [M+H]<sup>+</sup> Calcd. for C<sub>12</sub>H<sub>5</sub>BrF<sub>5</sub>S, 354.9215, Found, 354.9211.

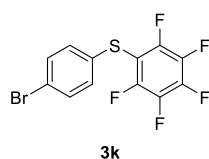

**(4-bromophenyl)(perfluorophenyl)sulfane (3k)** (known compound)<sup>[7]</sup>: white solid (30.8 mg, 87% yield); mp: 64–65 °C; <sup>1</sup>H NMR (400 MHz, CDCl<sub>3</sub>) δ 7.45–7.39 (m, 2H), 7.25–7.19 (m, 2H); <sup>13</sup>C NMR (100 MHz, CDCl<sub>3</sub>) δ 148.9–148.6 (m), 146.4–146.1 (m), 143.8–143.3 (m), 141.2–140.7 (m), 139.4–138.9 (m), 136.9–136.4 (m), 132.6, 132.2, 132.0, 122.4, 108.8–108.2 (m); <sup>19</sup>F NMR (376 MHz, CDCl<sub>3</sub>) δ -131.54– -131.66 (m, 2F), -150.53– -150.67 (m, 1F), -159.93– -160.10 (m, 2F); IR (KBr, thin film): 3075, 2925, 1637, 1513, 1489, 1292, 1094, 981, 862, 729 cm<sup>-1</sup>.

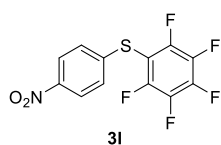

**(4-nitrophenyl)(perfluorophenyl)sulfane (3l)** (known compound)<sup>[8]</sup>: white solid (28.9 mg, 90% yield); mp: 89–90 °C; <sup>1</sup>H NMR (400 MHz, CDCl<sub>3</sub>) δ 8.20–8.11 (m, 2H), 7.35–7.28 (m, 2H); <sup>13</sup>C NMR (100 MHz, CDCl<sub>3</sub>) δ 149.2–148.8 (m), 146.7, 146.6–146.3 (m), 144.6–144.1 (m), 142.5, 142.0–141.5 (m), 139.6–139.1 (m), 137.1–136.6 (m), 127.9, 124.5, 105.9–105.3 (m); <sup>19</sup>F NMR (376 MHz, CDCl<sub>3</sub>) δ -130.27– -130.39 (m, 2F), -148.02– -148.16 (m, 1F), -158.71– -158.87 (m, 2F); IR (KBr, thin film): 3101, 2919, 1636, 1515, 1484, 1340, 1089, 975, 854, 740 cm<sup>-1</sup>.

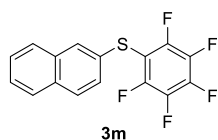

**naphthalen-2-yl(perfluorophenyl)sulfane (3m)** (known compound)<sup>[9]</sup>: white solid (25.4 mg, 78% yield); mp: 66–67 °C; <sup>1</sup>H NMR (400 MHz, CDCl<sub>3</sub>) δ 7.86 (d, *J* = 1.2 Hz, 1H), 7.82–7.72 (m, 3H), 7.53–7.45 (m, 2H), 7.41–7.35 (m, 1H); <sup>13</sup>C NMR (100 MHz, CDCl<sub>3</sub>) δ 149.0–148.7 (m), 146.5–146.2 (m), 143.6–143.1 (m), 141.1–140.6 (m), 139.4–138.9 (m), 136.8–136.4 (m), 133.6, 132.6, 130.0, 129.9, 129.3, 127.8, 127.7, 127.5, 127.0, 126.8, 109.3–108.8 (m); <sup>19</sup>F NMR (376 MHz, CDCl<sub>3</sub>) δ -131.58–

-131.71 (m, 2F), -151.12– -151.27 (m, 1F), -160.21– -160.38 (m, 2F); IR (KBr, thin film): 3064, 2912, 1629, 1515, 1484, 1256, 1097, 975, 816, 748 cm<sup>-1</sup>.

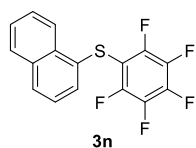

**naphthalen-1-yl(perfluorophenyl)sulfane (3n):** white solid (22.2 mg, 68% yield); mp: 81–82 °C; <sup>1</sup>H NMR (400 MHz, CDCl<sub>3</sub>) δ 8.48 (d, *J* = 8.8 Hz, 1H), 7.85 (t, *J* = 8.4 Hz, 2H), 7.67 (dd, *J* = 7.2, 0.4 Hz, 1H), 7.64–7.58 (m, 1H), 7.57–7.50 (m, 1H), 7.39 (dd, *J* = 8.0, 7.2 Hz, 1H); <sup>13</sup>C NMR (100 MHz, CDCl<sub>3</sub>) δ 148.9–148.6 (m), 146.5–146.1 (m), 143.2–142.8 (m), 140.7–140.2 (m), 139.3–138.8 (m), 136.8–136.3 (m), 134.2, 133.2, 132.0, 129.7, 129.3, 128.7, 127.3, 126.6, 125.6, 124.8, 109.8–109.2 (m); <sup>19</sup>F NMR (376 MHz, CDCl<sub>3</sub>) δ -132.77– -132.90 (m, 2F), -151.83– -151.98 (m, 1F), -160.42– -160.59 (m, 2F); IR (KBr, thin film): 3059, 2927, 1637, 1518, 1492, 1256, 1087, 981, 802, 748 cm<sup>-1</sup>; HRMS (APCI) *m/z*: [M-H]<sup>-</sup> Calcd. for C<sub>16</sub>H<sub>6</sub>F<sub>5</sub>S, 325.0115, Found, 325.0110.

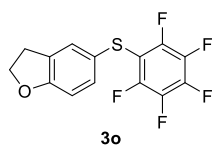

**5-((perfluorophenyl)thio)-2,3-dihydrobenzofuran (3o):** colorless liquid (15.9 mg, 50% yield); <sup>1</sup>H NMR (400 MHz, CDCl<sub>3</sub>) δ 7.35 (s, 1H), 7.31 (d, *J* = 8.0 Hz, 1H), 6.70 (d, *J* = 8.0 Hz, 1H), 4.58 (t, *J* = 8.8 Hz, 2H), 3.18 (t, *J* = 8.8 Hz, 2H); <sup>13</sup>C NMR (100 MHz, CDCl<sub>3</sub>) δ 161.1, 148.6–148.3 (m), 146.2–145.8 (m), 143.1–142.7 (m), 140.5–140.2 (m), 139.2–138.7 (m), 136.7–136.2 (m), 134.0, 130.3, 128.7, 122.2, 111.4–110.10 (m), 110.2, 71.7, 29.4; <sup>19</sup>F NMR (376 MHz, CDCl<sub>3</sub>) δ -132.72– -132.84 (m, 2F), -152.52– -152.66 (m, 1F), -160.79– -160.96 (m, 2F); IR (KBr, thin film): 2963, 2902, 1601, 1510, 1483, 1234, 1090, 979, 857, 816 cm<sup>-1</sup>; HRMS (APCI) *m/z*: [M]<sup>+</sup> Calcd. for C<sub>14</sub>H<sub>7</sub>F<sub>5</sub>OS, 318.0137, Found, 318.0140.

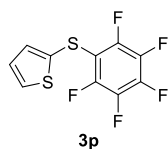

**2-((perfluorophenyl)thio)thiophene (3p)** (known compound)<sup>[10]</sup>: colorless liquid (21.4 mg, 76% yield); <sup>1</sup>H NMR (400 MHz, CDCl<sub>3</sub>) δ 7.40 (dd, *J* = 5.6, 1.6 Hz, 1H), 7.38–7.33 (m, 1H), 6.97 (dd, *J* = 5.2, 3.6 Hz, 1H); <sup>13</sup>C NMR (100 MHz, CDCl<sub>3</sub>) δ 148.6–148.3 (m), 146.1–145.8 (m), 143.7–143.2 (m), 141.2–140.7 (m), 139.2–138.7 (m), 136.7–136.2 (m), 131.5, 129.3, 127.7, 110.8–110.1 (m); <sup>19</sup>F NMR (376 MHz, CDCl<sub>3</sub>) δ -132.62– -132.75 (m, 2F), -151.21– -151.35 (m, 1F), -160.29– -160.45 (m, 2F); IR (KBr, thin film): 3109, 2926, 1636, 1515, 1491, 1218, 1089, 983, 854, 709 cm<sup>-1</sup>.

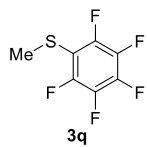

**methyl(perfluorophenyl)sulfane (3q)** (known compound)<sup>[11]</sup>: colorless liquid (18.8 mg, 88% yield); <sup>1</sup>H NMR (400 MHz, CDCl<sub>3</sub>) δ 2.48 (s, 3H); <sup>13</sup>C NMR (100 MHz, CDCl<sub>3</sub>) δ 148.5–148.2 (m), 146.1–145.7 (m), 142.5–142.1 (m), 140.0–139.5 (m), 139.2–138.7 (m), 136.7–136.2 (m), 111.3–110.7 (m), 18.1; <sup>19</sup>F NMR (376 MHz, CDCl<sub>3</sub>) δ -133.57– -133.69 (m, 2F), -153.79– -153.93 (m, 1F), -161.26– -161.43 (m, 2F); IR (KBr, thin film): 3360, 3185, 2919, 2851, 1659, 1636, 1469, 1416, 1271, 740 cm<sup>-1</sup>.

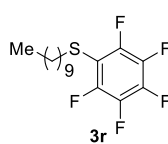

**decyl(perfluorophenyl)sulfane (3r)** (known compound)<sup>[12]</sup>: colorless liquid (25.8 mg, 76% yield); <sup>1</sup>H NMR (400 MHz, CDCl<sub>3</sub>) δ 2.86 (t, *J* = 7.2 Hz, 2H), 1.59–1.50 (m, 2H), 1.45–1.21 (m, 16H), 0.91–0.85 (m, 3H); <sup>13</sup>C NMR (100 MHz, CDCl<sub>3</sub>) δ 148.9–148.6 (m), 146.5–146.2 (m), 142.6–142.2 (m), 140.1–139.6 (m), 139.2–138.7 (m), 136.6–136.2 (m), 142.6–142.2 (m), 140.1–139.6 (m), 139.2–138.7 (m), 136.6–136.2 (m).

(m), 109.8–109.2 (m), 35.0, 31.9, 29.8, 29.5, 29.4, 29.3, 29.1, 28.3, 22.7, 14.1;  $^{19}\text{F}$  NMR (376 MHz,  $\text{CDCl}_3$ )  $\delta$  -132.64– -132.76 (m, 2F), -153.30– -153.44 (m, 1F), -161.21– -161.38 (m, 2F); IR (KBr, thin film): 2926, 2859, 1636, 1515, 1484, 1294, 1089, 983, 861, 725  $\text{cm}^{-1}$ .

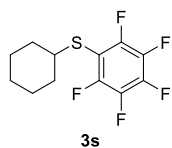

**cyclohexyl(perfluorophenyl)sulfane (3s)** (known compound)<sup>[13]</sup>:

white solid (20.9 mg, 74% yield); mp: 51–52 °C;  $^1\text{H}$  NMR (400 MHz,  $\text{CDCl}_3$ )  $\delta$  3.23–3.04 (m, 1H), 1.94–1.83 (m, 2H), 1.83–1.74 (m, 2H), 1.66–1.56 (m, 1H), 1.41–1.20 (m, 5H);  $^{13}\text{C}$  NMR (100 MHz,  $\text{CDCl}_3$ )  $\delta$  149.2–148.9 (m), 146.8–146.5 (m), 142.8–142.4 (m), 140.1–139.8 (m), 139.1–138.5 (m), 136.6–136.1 (m), 108.5–107.8 (m), 47.5, 33.3, 25.8, 25.4;  $^{19}\text{F}$  NMR (376 MHz,  $\text{CDCl}_3$ )  $\delta$  -131.40– -131.51 (m, 2F), -152.59– -152.72 (m, 1F), -161.20– -161.36 (m, 2F); IR (KBr, thin film): 3092, 2919, 1636, 1515, 1484, 1271, 1089, 975, 861, 717  $\text{cm}^{-1}$ .

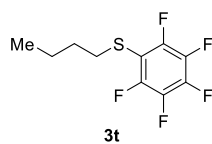

**butyl(perfluorophenyl)sulfane (3t)** (known compound)<sup>[14]</sup>:

colorless liquid (22.2 mg, 79% yield);  $^1\text{H}$  NMR (400 MHz,  $\text{CDCl}_3$ )  $\delta$  2.88 (t,  $J$  = 7.6 Hz, 2H), 1.58–1.49 (m, 2H), 1.48–1.37 (m, 2H), 0.91 (t,  $J$  = 7.2 Hz, 3H);  $^{13}\text{C}$  NMR (100 MHz,  $\text{CDCl}_3$ )  $\delta$  149.0–148.6 (m), 146.5–146.2 (m), 142.6–142.2 (m), 140.2–139.7 (m), 139.2–138.7 (m), 136.7–136.2 (m), 109.8–109.1 (m), 34.7, 31.8, 21.5, 13.5;  $^{19}\text{F}$  NMR (376 MHz,  $\text{CDCl}_3$ )  $\delta$  -132.66– -132.77 (m, 2F), -153.23– -153.37 (m, 1F), -161.18– -161.33 (m, 2F); IR (KBr, thin film): 3657, 2924, 2855, 2363, 2043, 1715, 1652, 1558, 1498, 1458  $\text{cm}^{-1}$ .

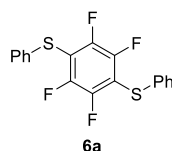

**(perfluoro-1,4-phenylene)bis(phenylsulfane) (6a)** (known

compound)<sup>[15]</sup>: white solid (14.6 mg, 40% yield); mp: 94–95 °C;  $^1\text{H}$  NMR (400 MHz,  $\text{CDCl}_3$ )  $\delta$  7.42–7.35 (m, 4H), 7.33–7.26 (m, 6H);  $^{13}\text{C}$  NMR (100 MHz,  $\text{CDCl}_3$ )  $\delta$  148.4–148.0 (m), 145.9–145.5 (m), 132.6, 131.0, 129.4, 128.1, 115.5–115.1 (m);  $^{19}\text{F}$  NMR (376 MHz,  $\text{CDCl}_3$ )  $\delta$  -132.03.

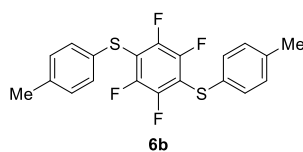

**(perfluoro-1,4-phenylene)bis(p-tolylsulfane) (6b)** (known

compound)<sup>[15]</sup>: white solid (21.3 mg, 54% yield); mp: 104–105 °C;  $^1\text{H}$  NMR (400 MHz,  $\text{CDCl}_3$ )  $\delta$  7.32 (d,  $J$  = 8.0 Hz, 2H), 7.10 (d,  $J$  = 8.0 Hz, 2H), 2.32 (s, 3H);  $^{13}\text{C}$  NMR (100 MHz,  $\text{CDCl}_3$ )  $\delta$  148.3–147.8 (m), 145.8–145.3 (m), 138.5, 131.8, 130.1, 128.9, 115.8–115.4 (m), 21.1;  $^{19}\text{F}$  NMR (376 MHz,  $\text{CDCl}_3$ )  $\delta$  -131.63.

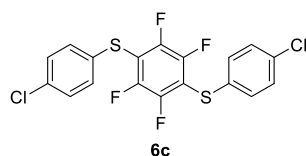

**(perfluoro-1,4-phenylene)bis((4-chlorophenyl)sulfane)**

**(6c)** (known compound)<sup>[5]</sup>: white solid (16.1 mg, 37% yield); mp: 158–159 °C;  $^1\text{H}$  NMR (400 MHz,  $\text{CDCl}_3$ )  $\delta$  7.37–7.32 (m, 2H), 7.30–7.26 (m, 2H);  $^{13}\text{C}$  NMR (100 MHz,  $\text{CDCl}_3$ )  $\delta$  148.3–147.9 (m), 145.7–145.4 (m), 134.6, 132.7, 130.8, 129.6, 115.5–114.8 (m);  $^{19}\text{F}$  NMR (376 MHz,  $\text{CDCl}_3$ )  $\delta$  -131.82.

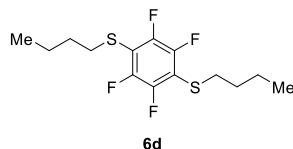

**(perfluoro-1,4-phenylene)bis(butylsulfane) (6d)** (known

compound)<sup>[15]</sup>: colorless liquid (7.5 mg, 23% yield);  $^1\text{H}$  NMR (400 MHz,  $\text{CDCl}_3$ )  $\delta$  2.94 (t,  $J$  = 7.2 Hz, 2H), 1.60–1.54 (m,



2H), 1.49–1.38 (m, 2H), 0.91 (t,  $J = 7.2$  Hz, 3H);  $^{13}\text{C}$  NMR (100 MHz,  $\text{CDCl}_3$ )  $\delta$  148.4–148.0 (m), 145.8–145.5 (m), 114.6–114.2 (m), 34.4, 31.8, 21.5, 13.5, 0.1 (t,  $J = 3.0$  Hz);  $^{19}\text{F}$  NMR (376 MHz,  $\text{CDCl}_3$ )  $\delta$  -134.06.

## 2.8 References

- [1] X. Zhao, T. -X. Liu and G. Zhang, *Asian J. Org. Chem.*, 2017, **6**, 677.
- [2] K. Bahrami, M. M. Khodaei and D. Khaledian, *Tetrahedron Lett.*, 2012, **53**, 354.
- [3] Q. Chen, Y. Huang, X. Wang, J. Wu and G. Yu, *Org. Biomol. Chem.*, 2018, **16**, 1713.
- [4] A. Desaintjean, T. Haupt, L. J. Bole, N. R. Judge, E. Hevia and P. Knochel, *Angew. Chem. Int. Ed.*, 2021, **60**, 1513.
- [5] C. Yu, C. Zhang and X. Shi, *Eur. J. Org. Chem.*, 2012, 1953.
- [6] M. Arisawa, S. Tanii, T. Tazawa and M. Yamaguchi, *Chem. Commun.*, 2016, **52**, 11390.
- [7] J. Zhao, Y. Yu, X. Yang, X. Yan, H. Zhang, X. Xu, G. Zhou, Z. Wu, Y. Ren and W. -Y. Wong, *ACS Appl. Mater. Inter.*, 2015, **7**, 24703.
- [8] N. V. Kondratenko, A. A. Kolomeytsev, V. I. Popov and L. M. Yagupolskii, *Synthesis.*, 1985, **6**, 667.
- [9] B. J. Musolino and G. W. Kabalka, *Heterocycles.*, 2015, **90**, 271.
- [10] T. S. Leong and M. E. Peach, *J. Fluorine Chem.*, 1975, **5**, 545.
- [11] F. Weidlich, N. Esumi, D. Chen, C. Mück-Lichtenfeld, E. Zysman-Colman and A. Studer, *Adv. Synth. Catal.*, 2020, **362**, 376.
- [12] T. Tamai, K. Fujiwara, S. Higashimae, A. Nomoto and A. Ogawa, *Org. Lett.*, 2016, **18**, 2114.
- [13] V. V. Levin and A. D. Dilman, *J. Org. Chem.*, 2019, **84**, 8337.
- [14] N. G. Payne and M. E. Peach, *Sulfur Letters.*, 1986, **4**, 271.
- [15] K. Nishino, S. Tsukahara, Y. Ogiwara and N. Sakai, *Eur. J. Org. Chem.*, 2019, 1588.

### 3. Copies of NMR spectra of products

3a

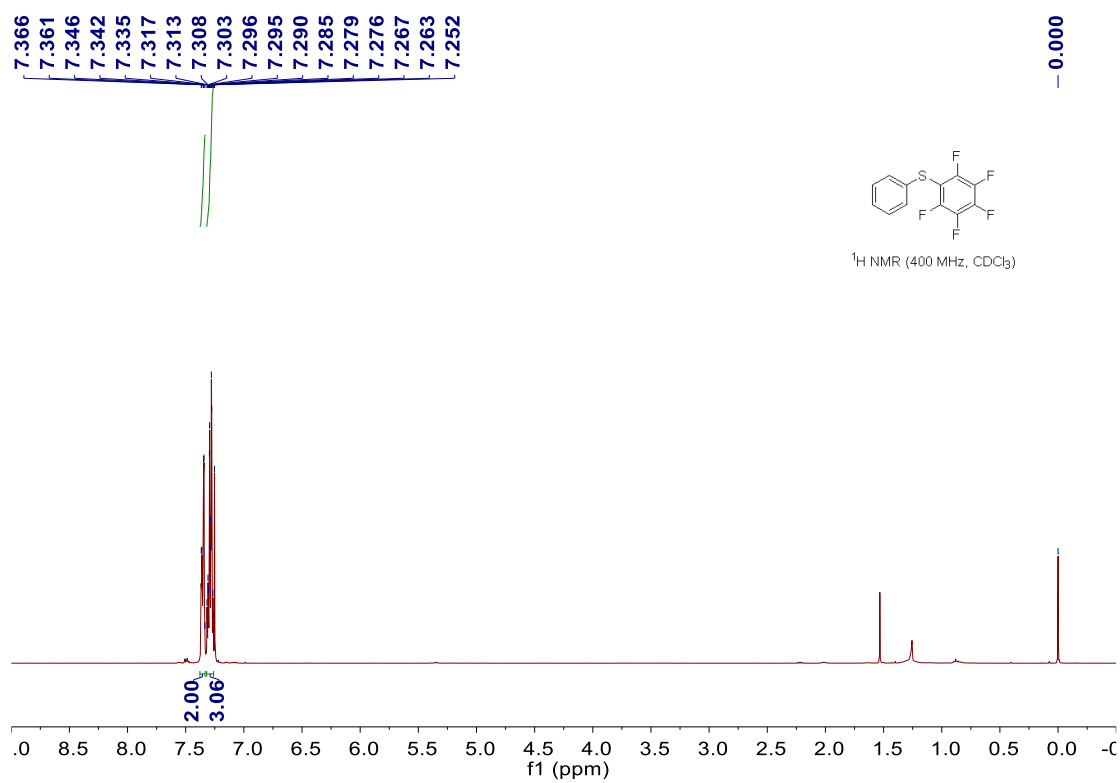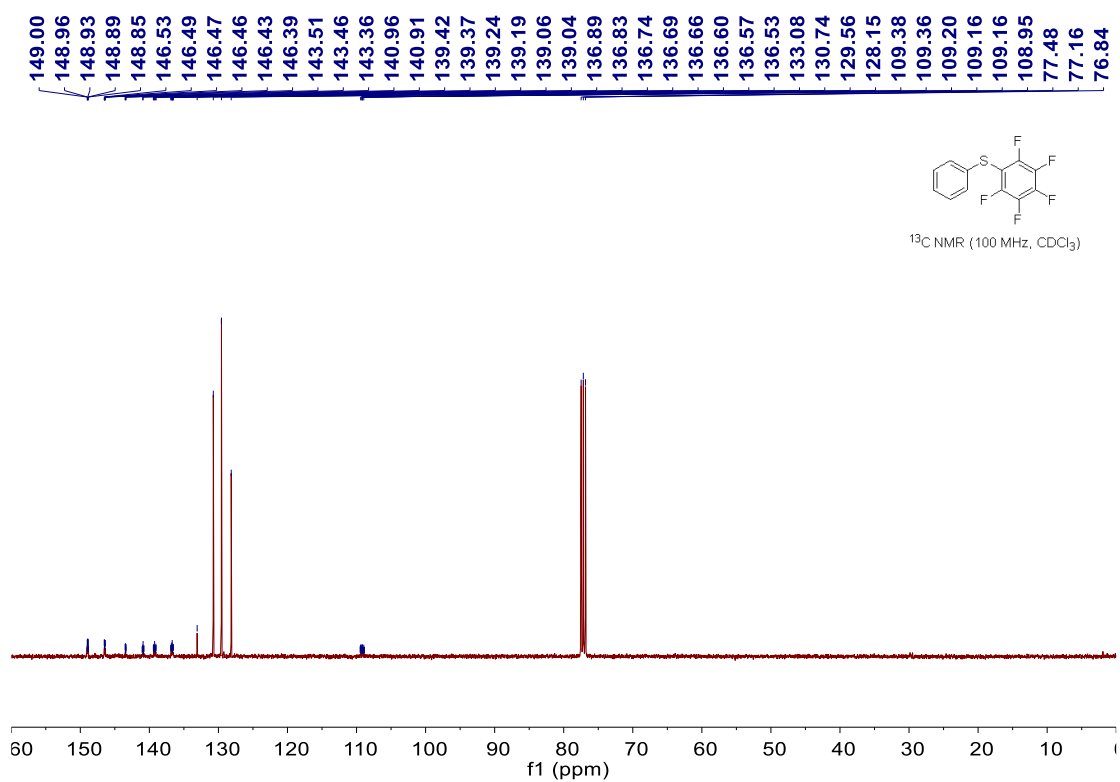

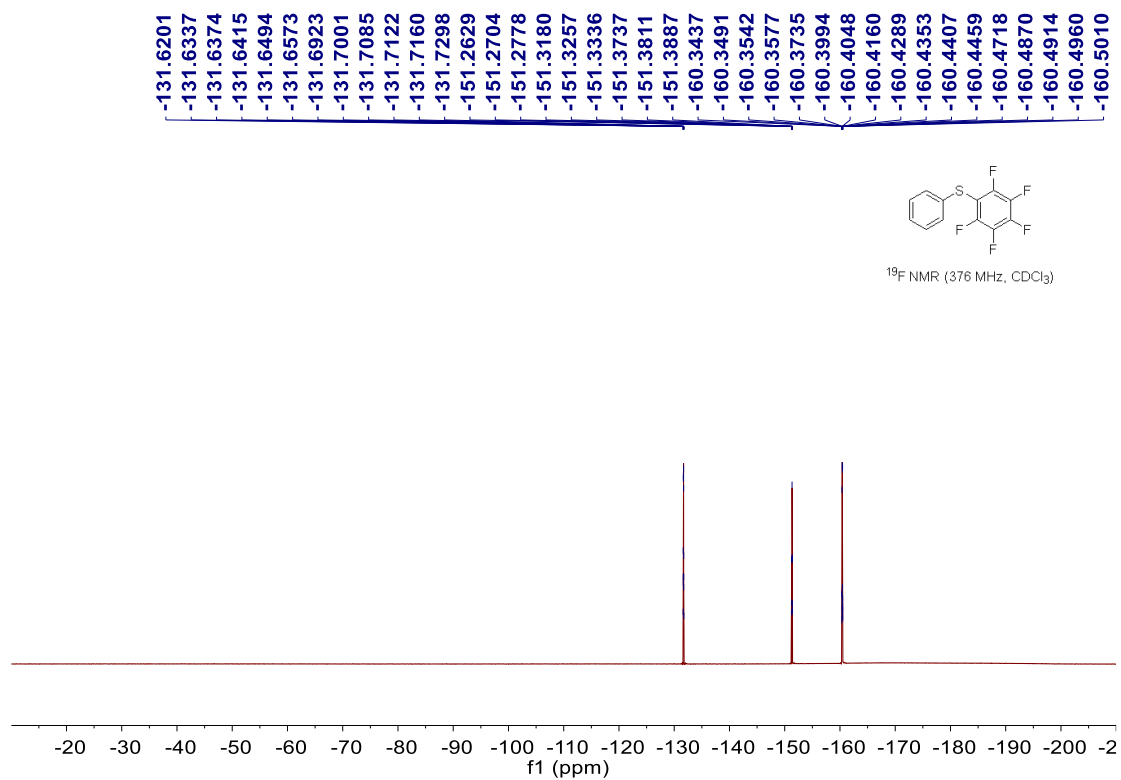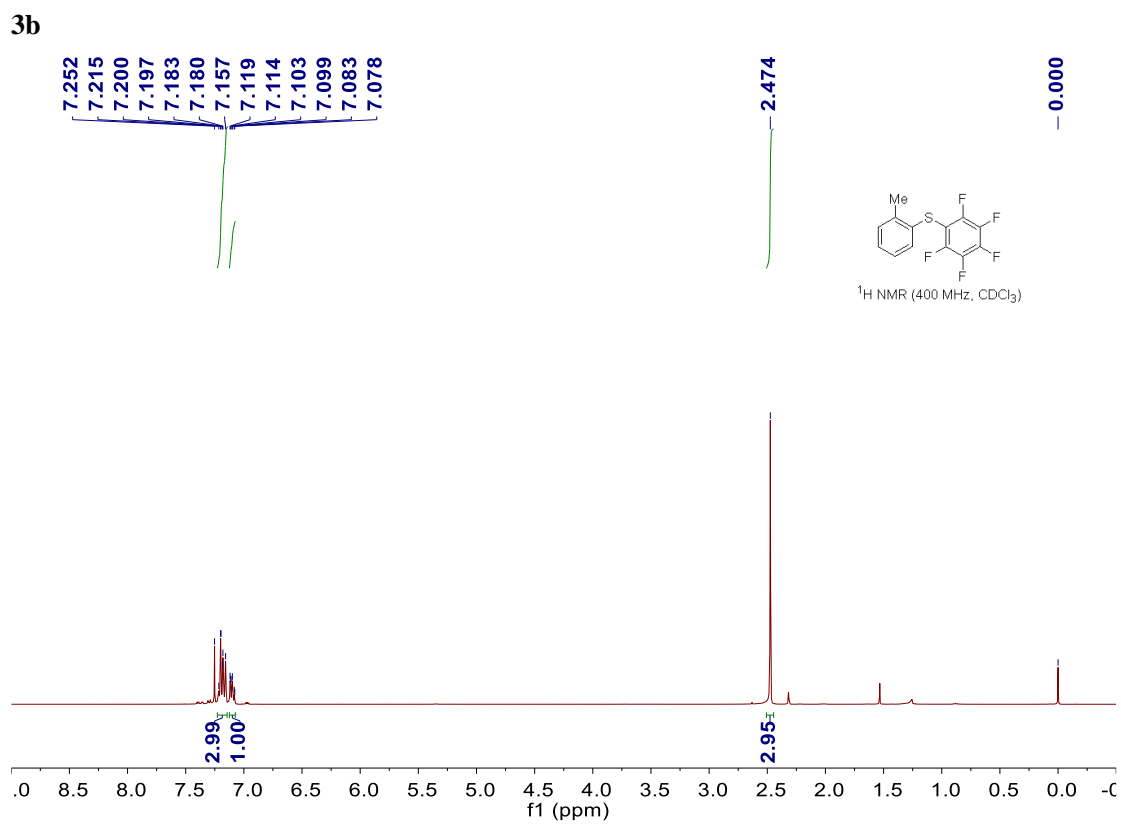

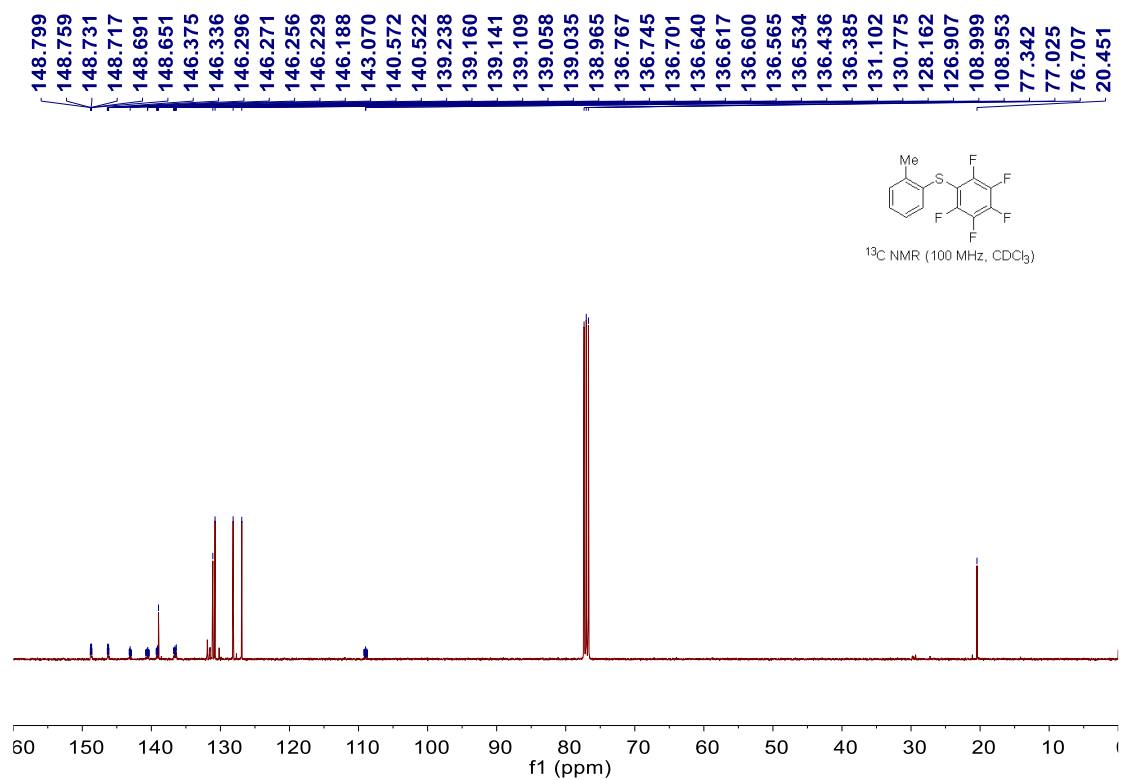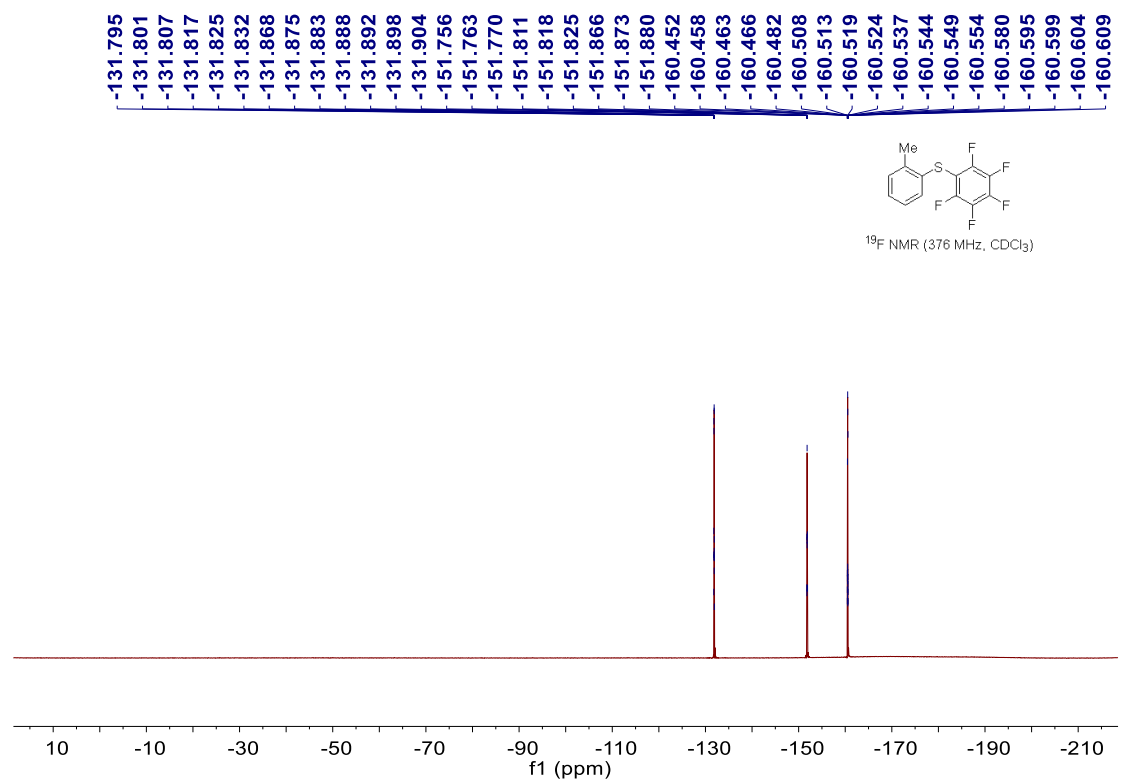

3c

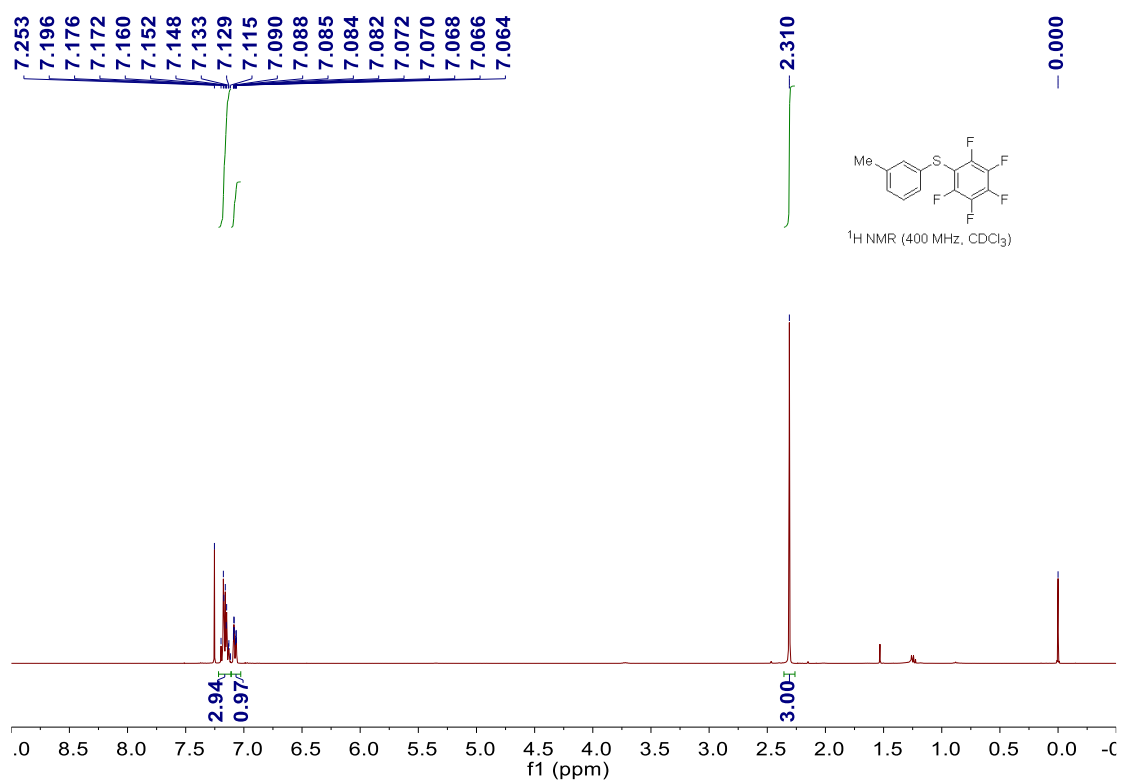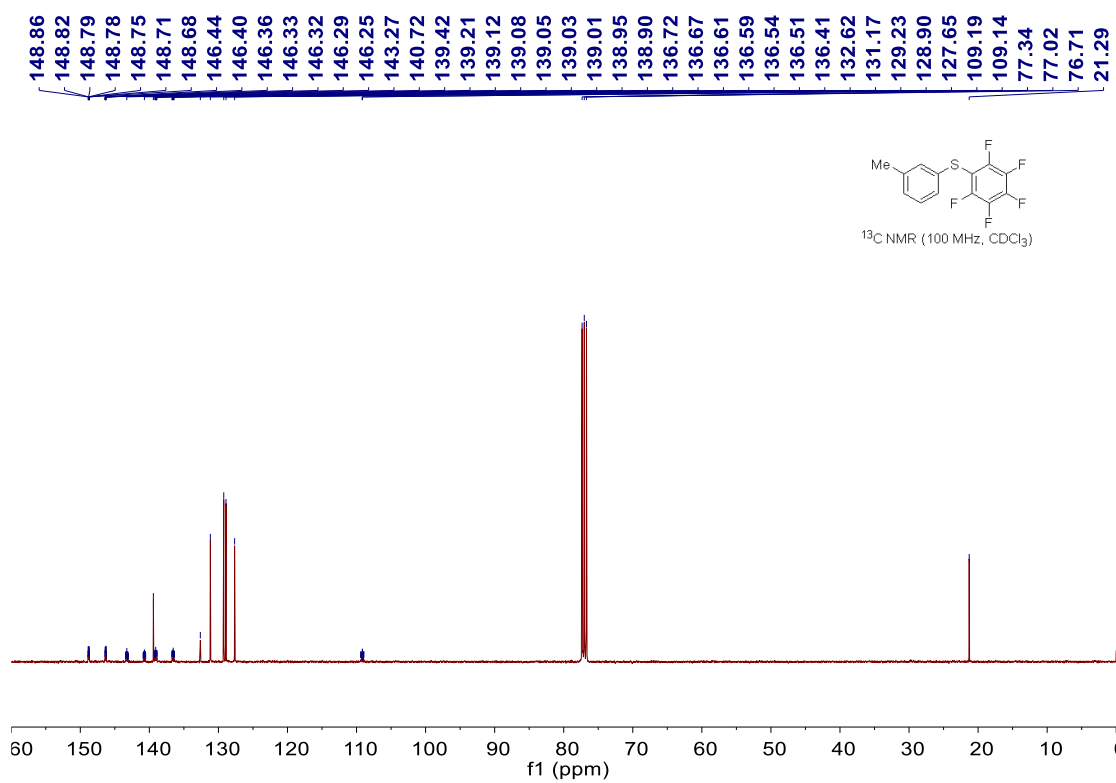

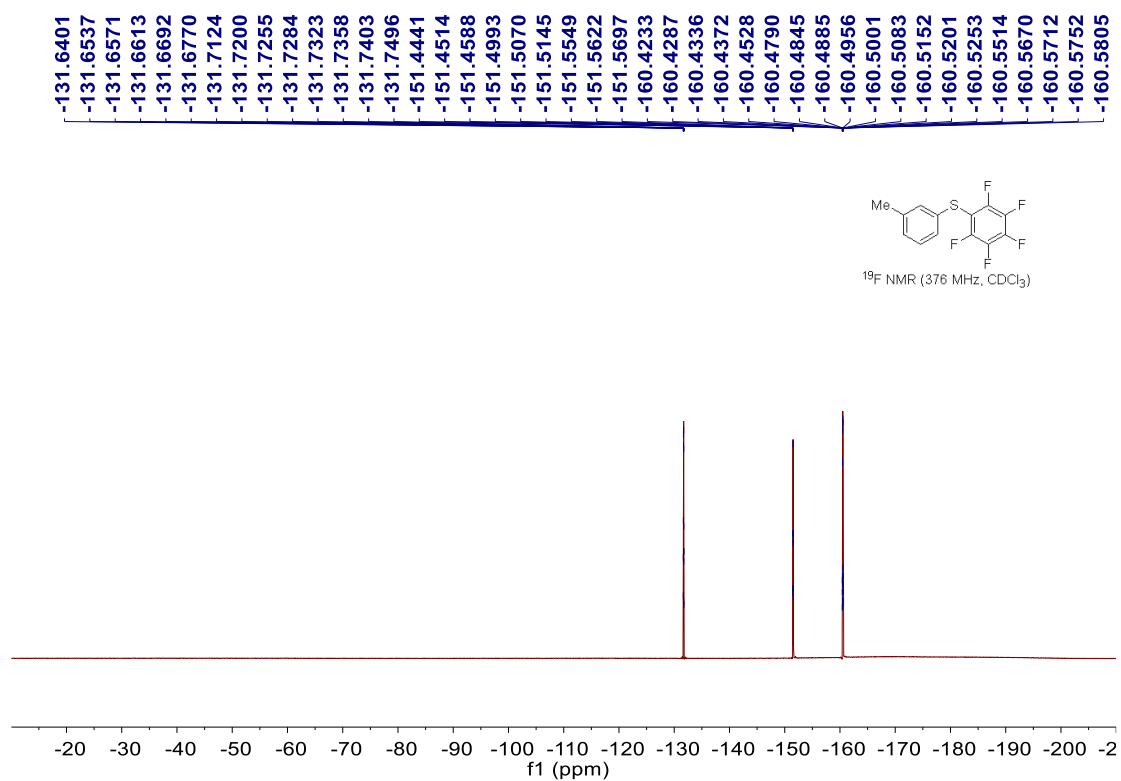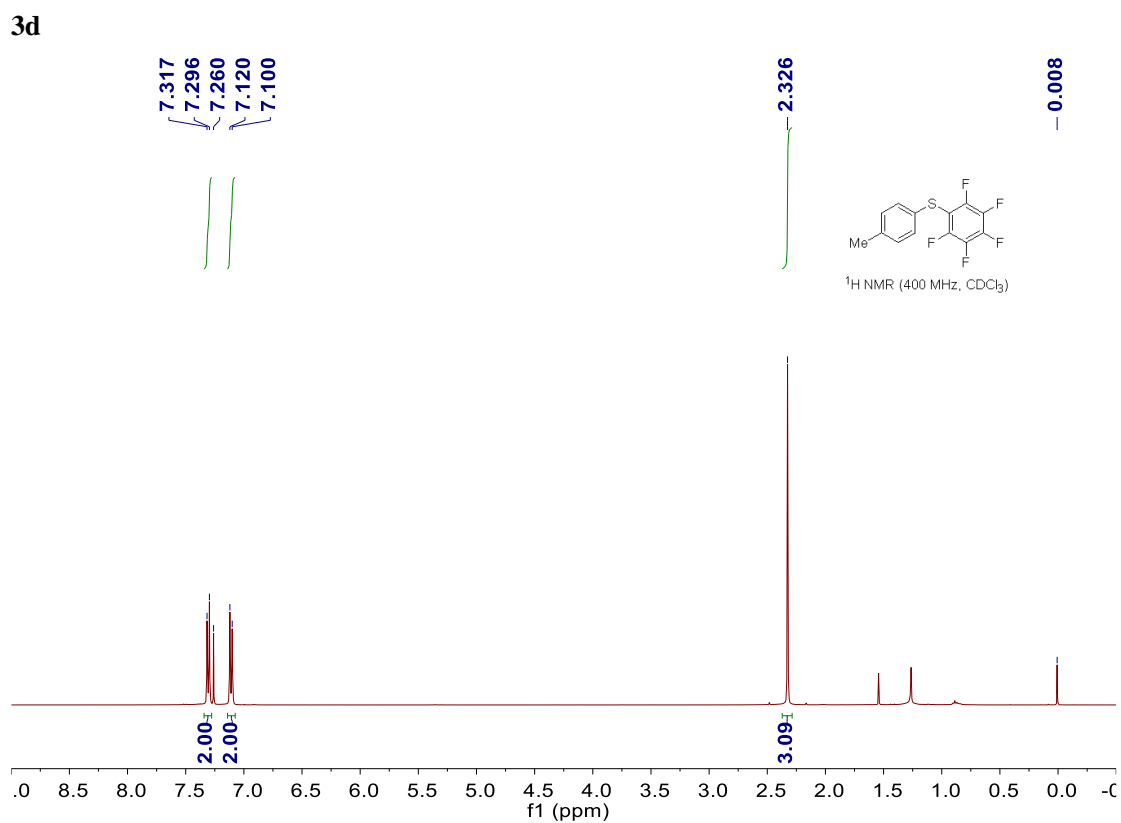

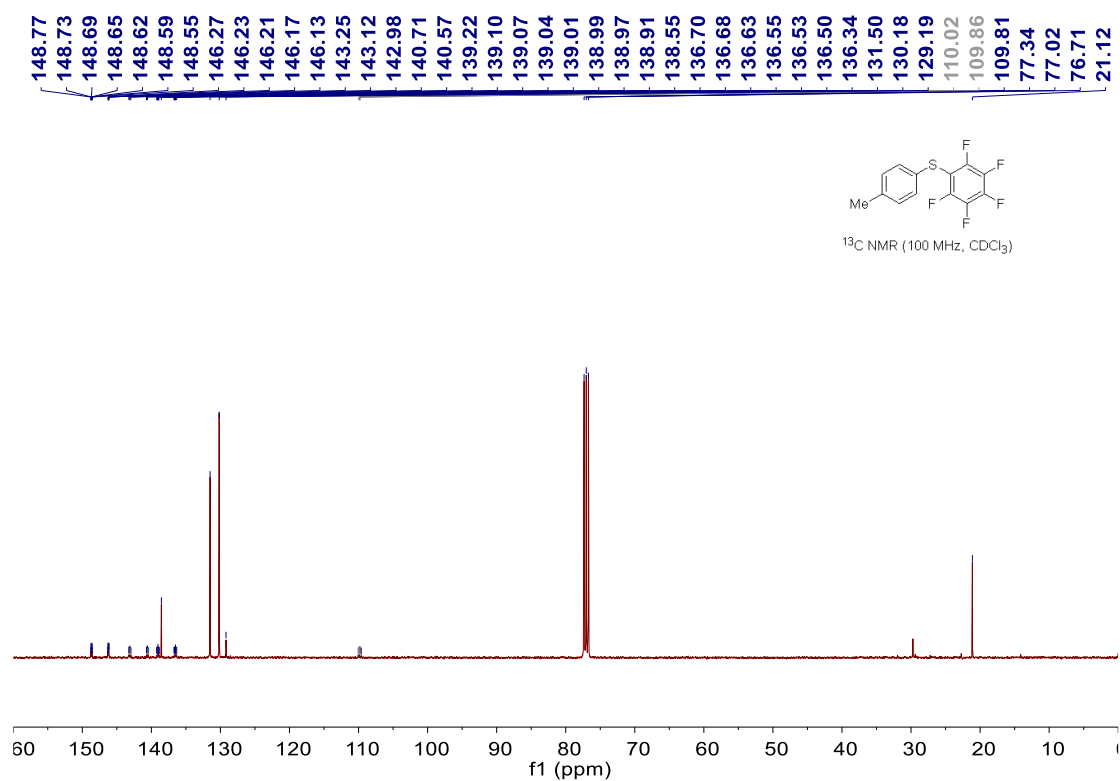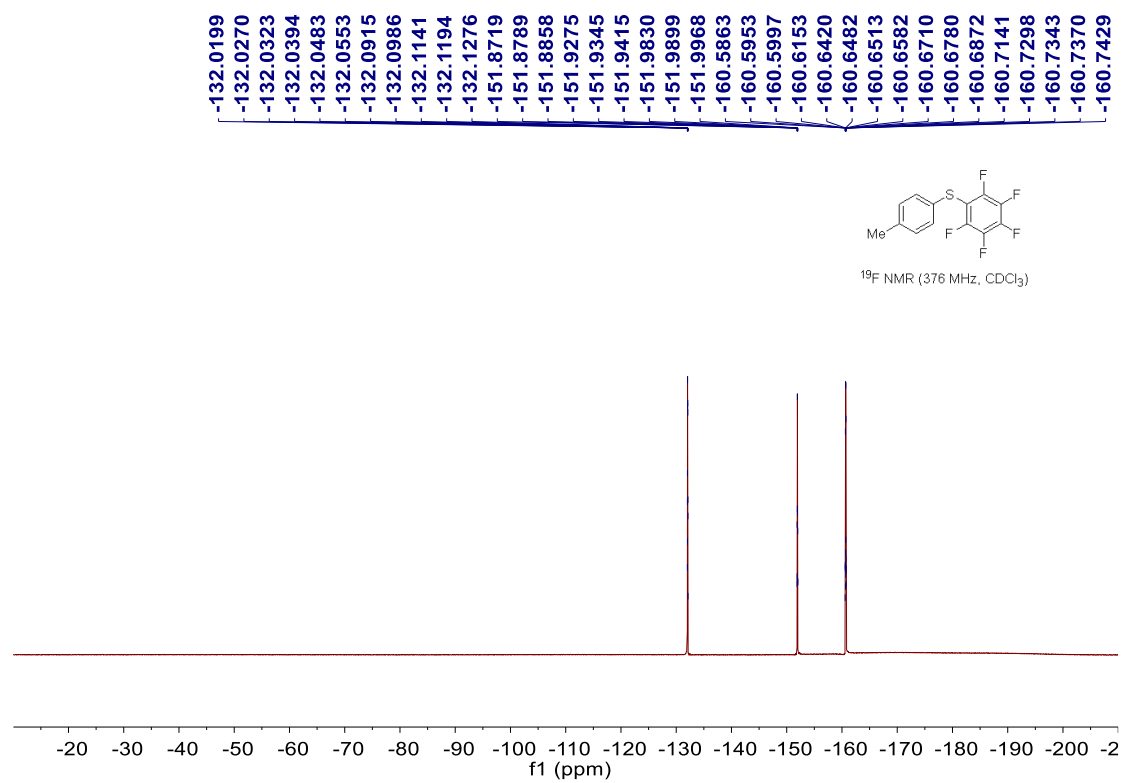

3e

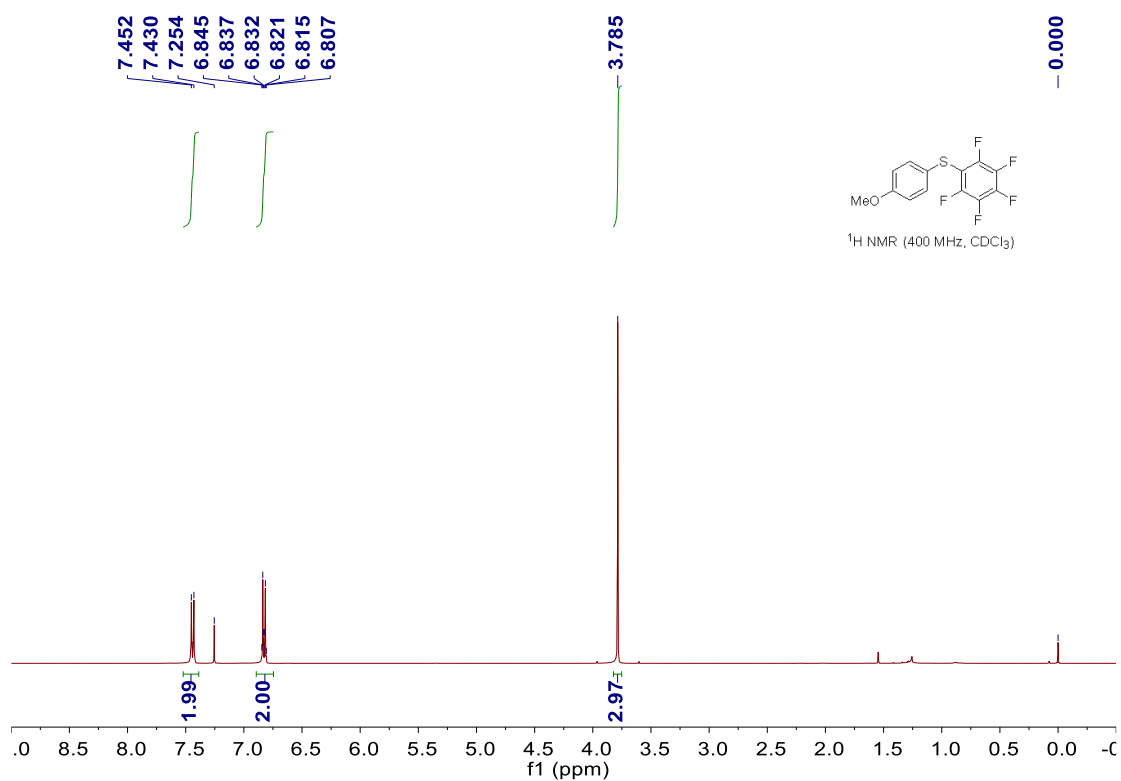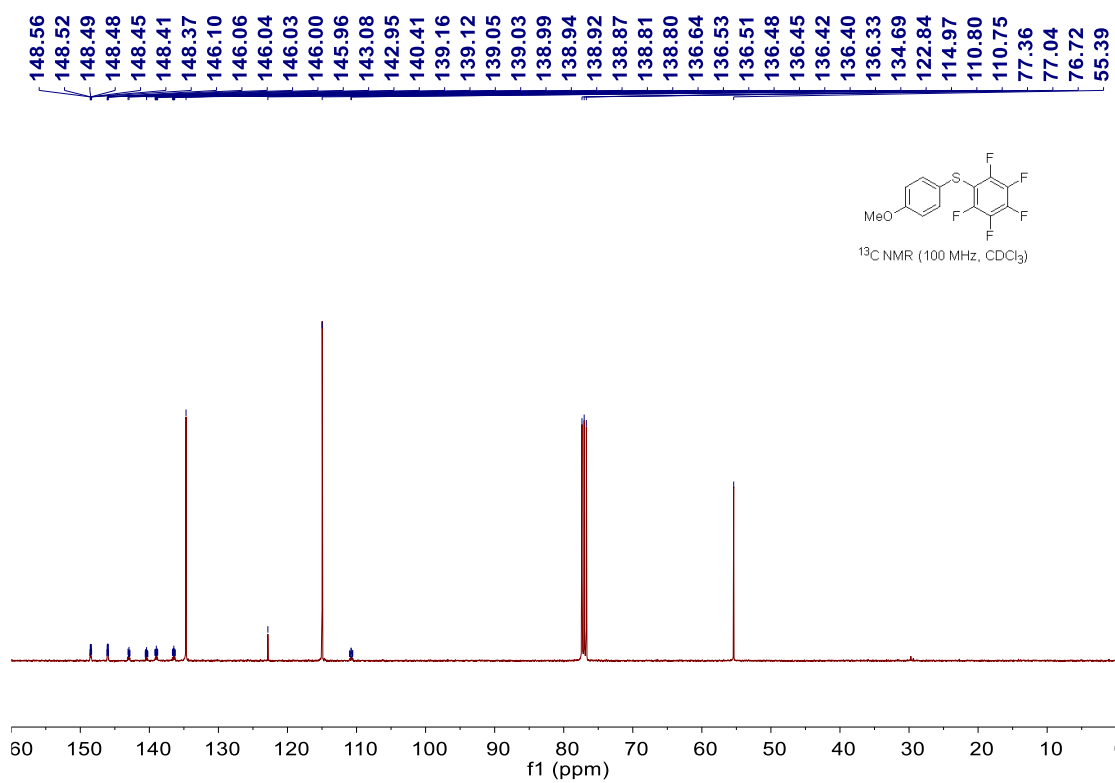



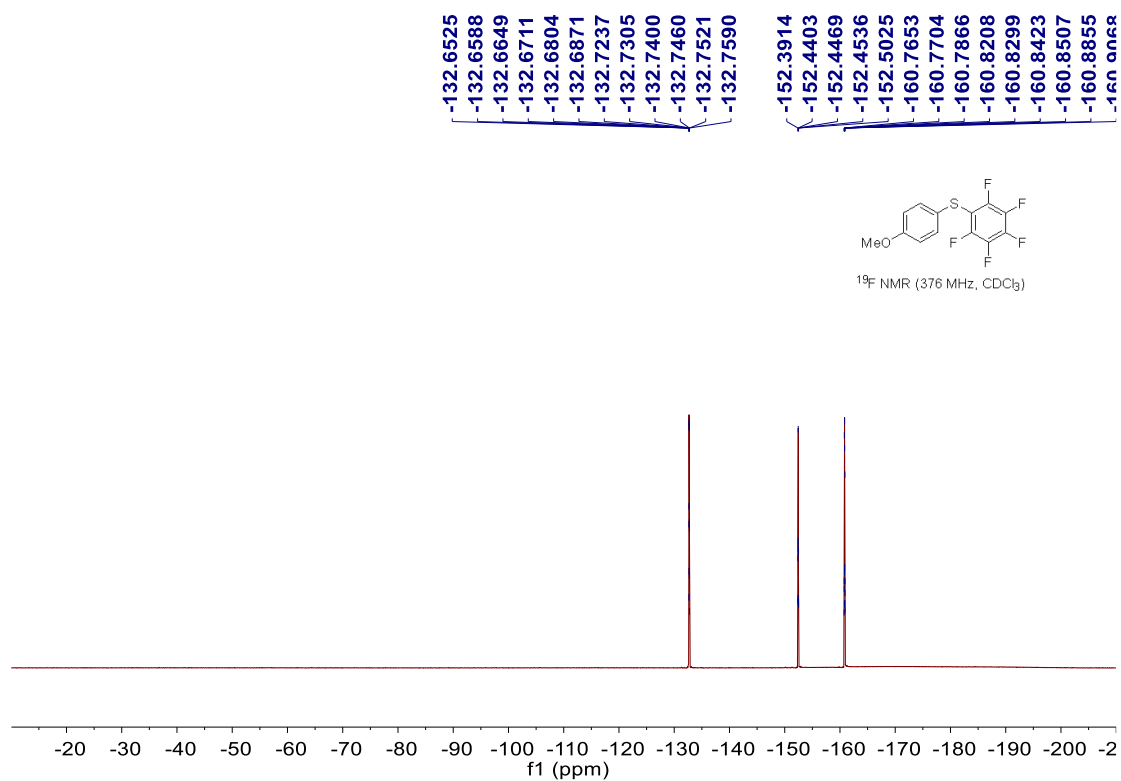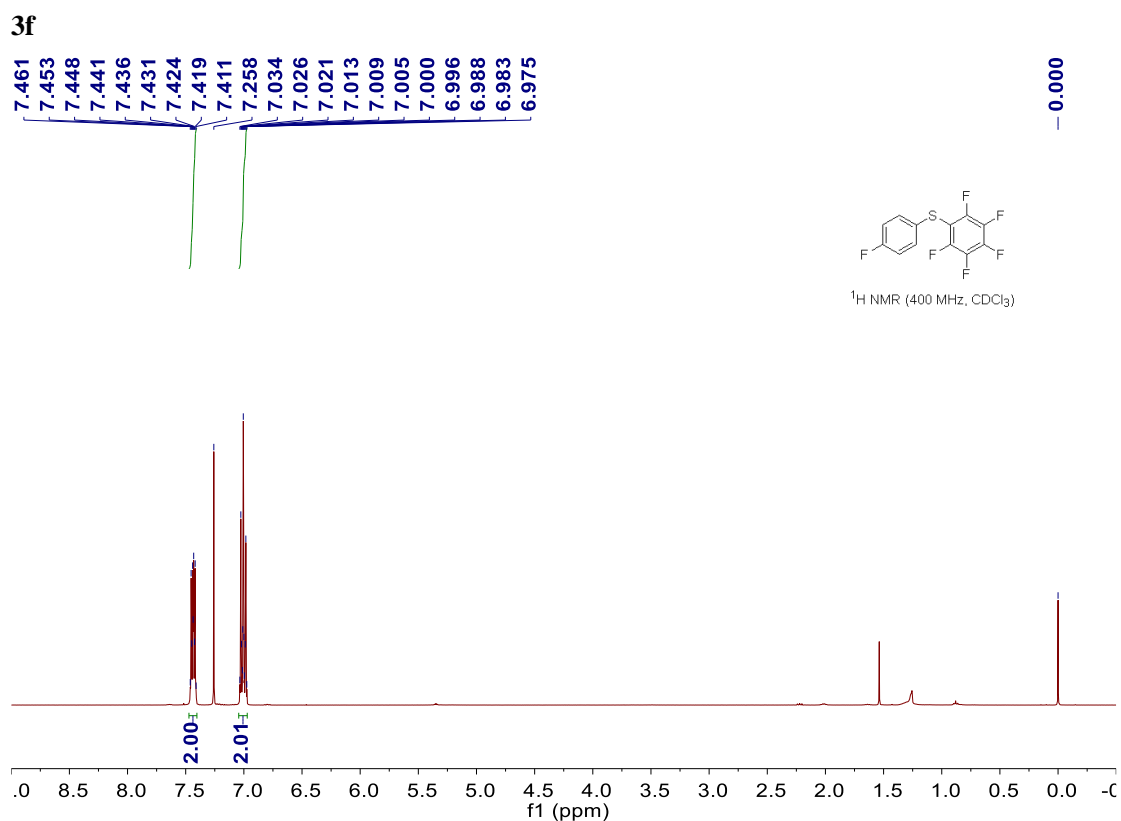

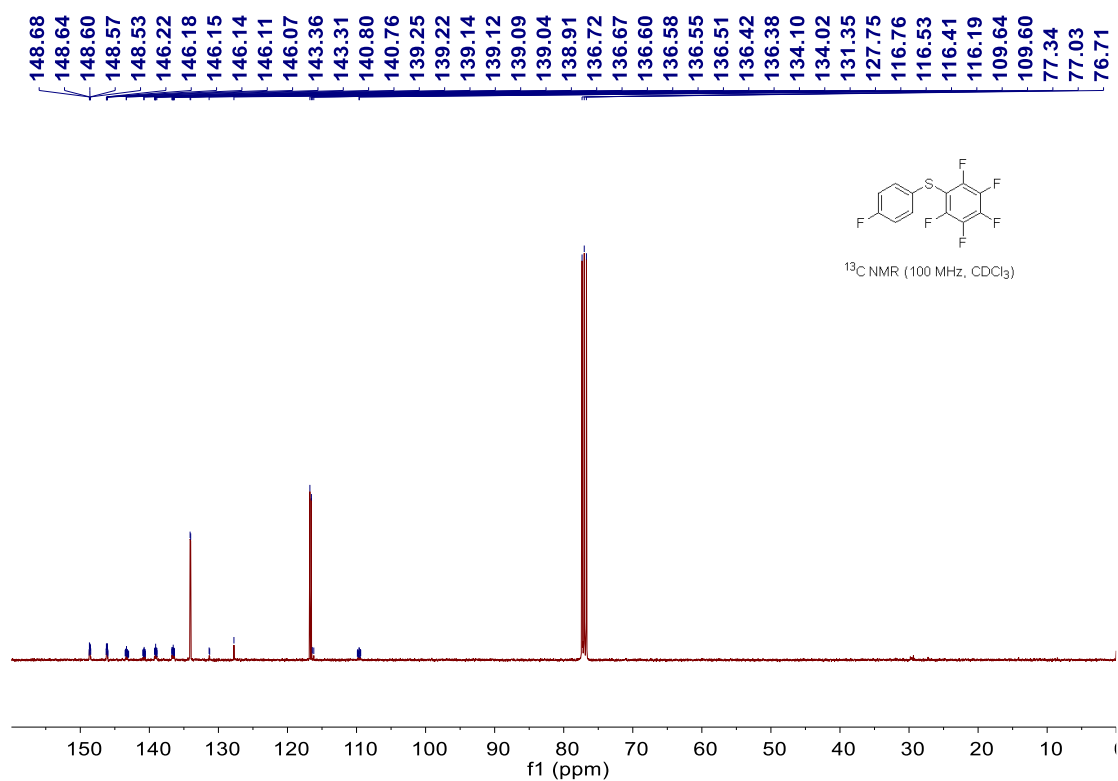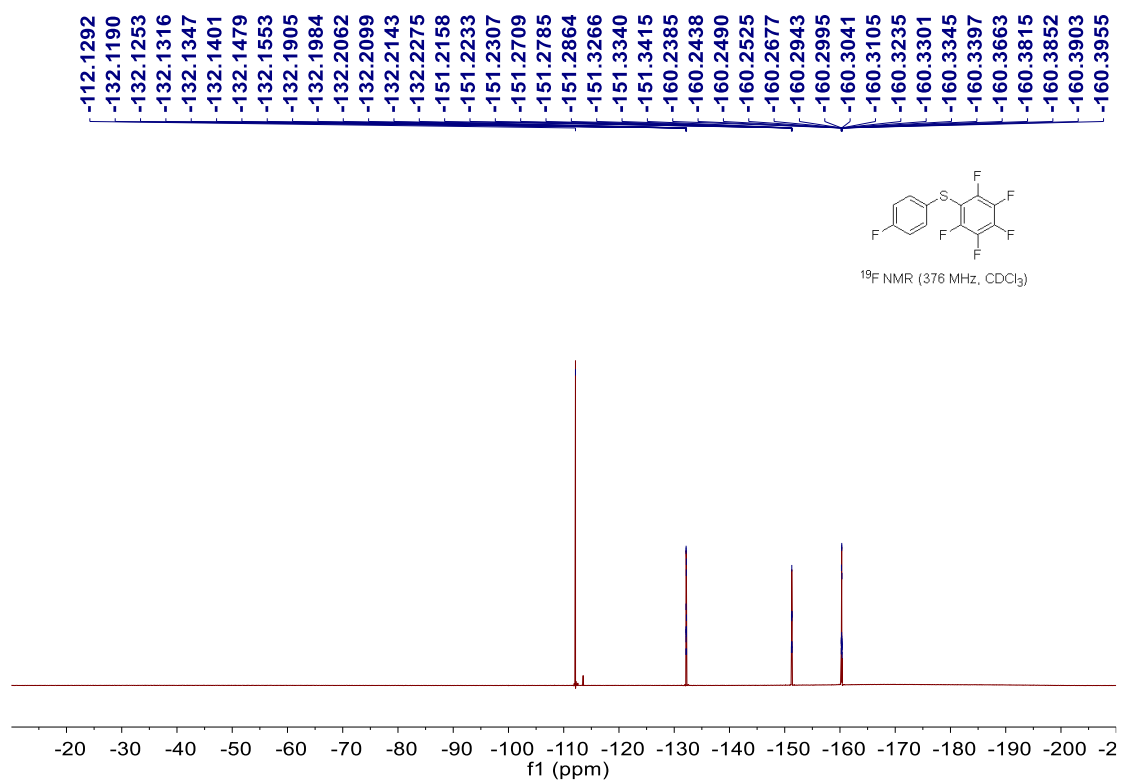

3g

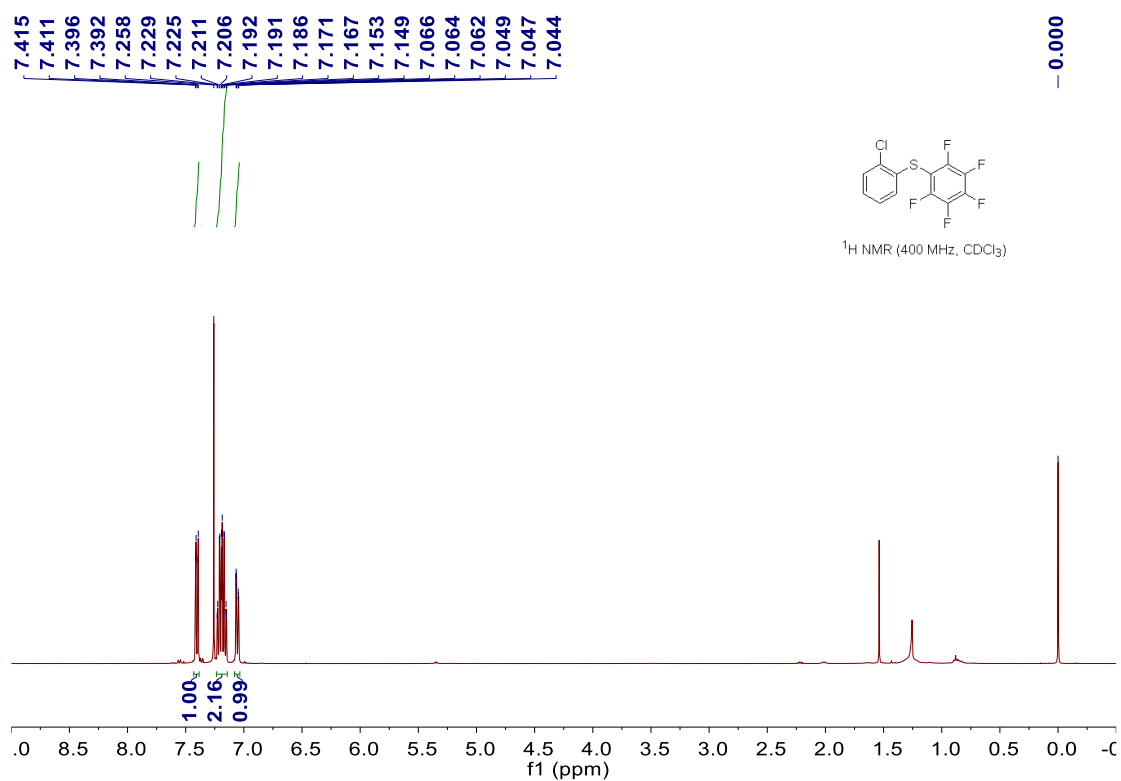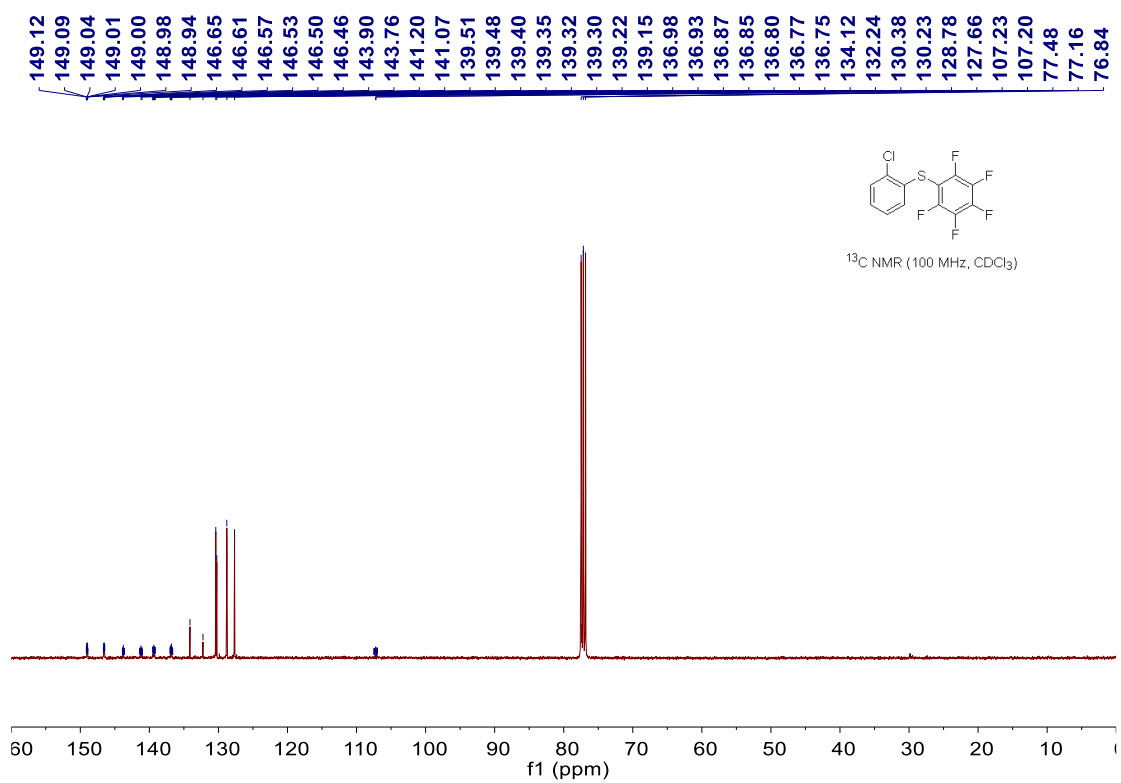

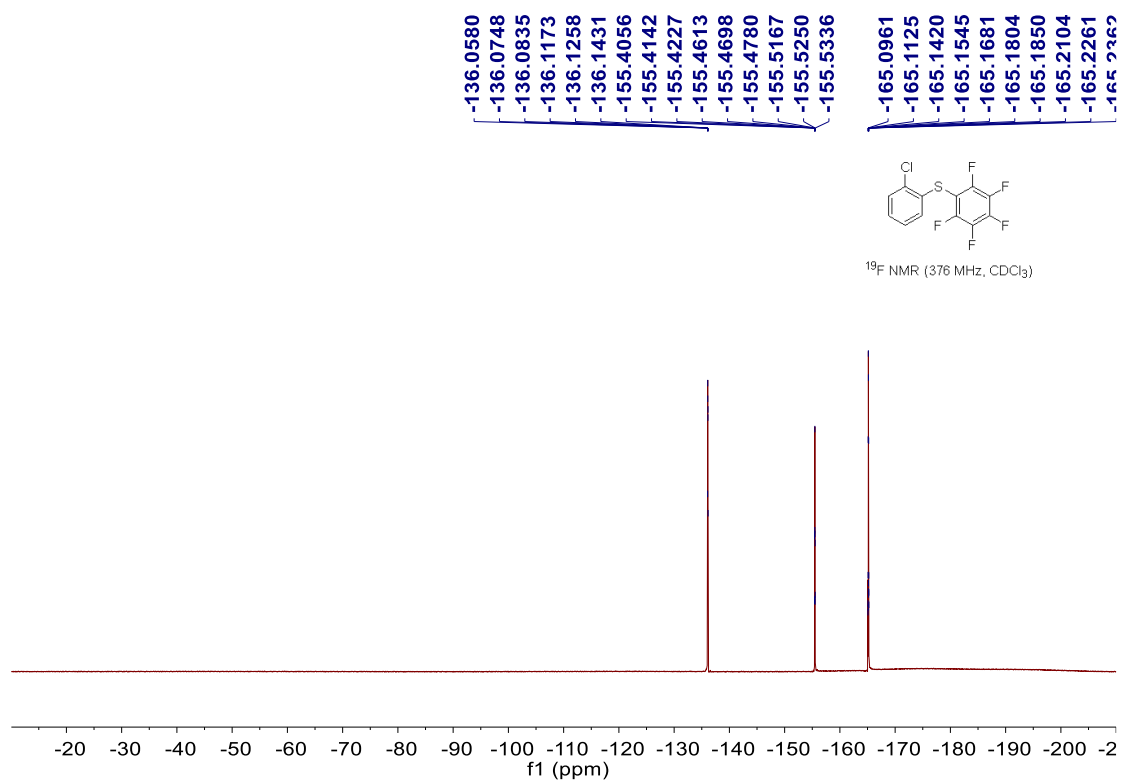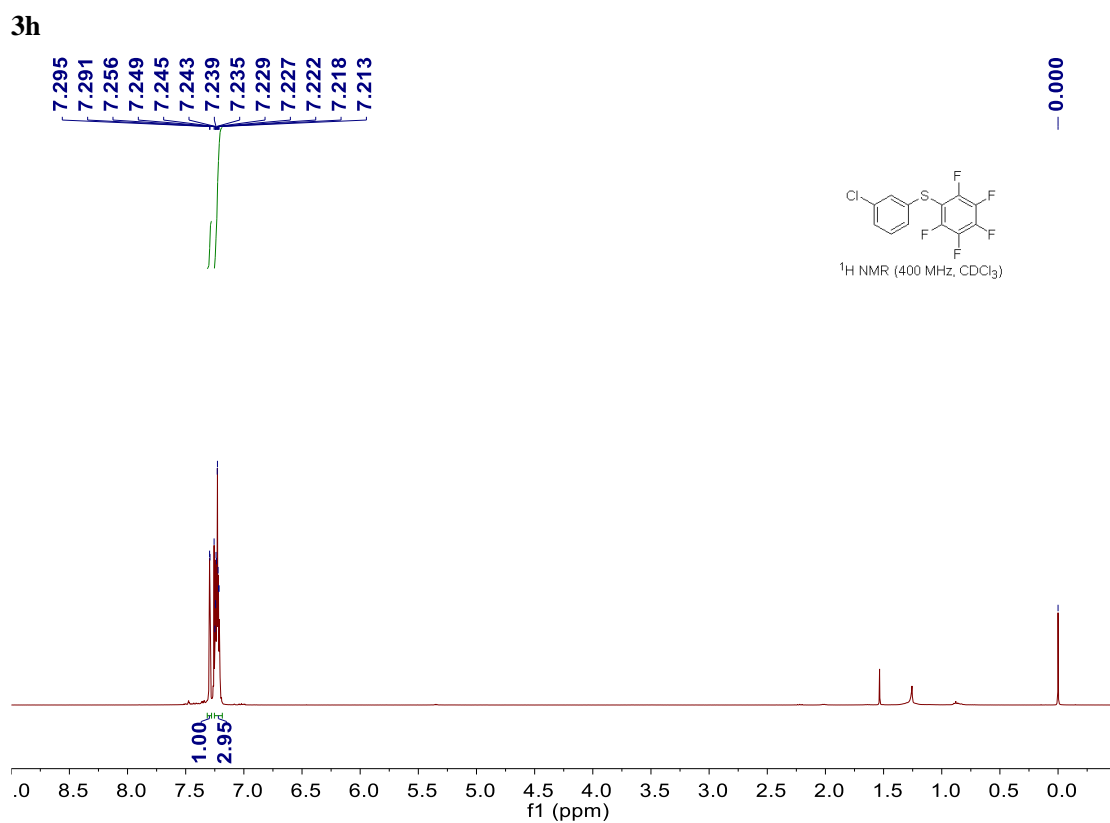

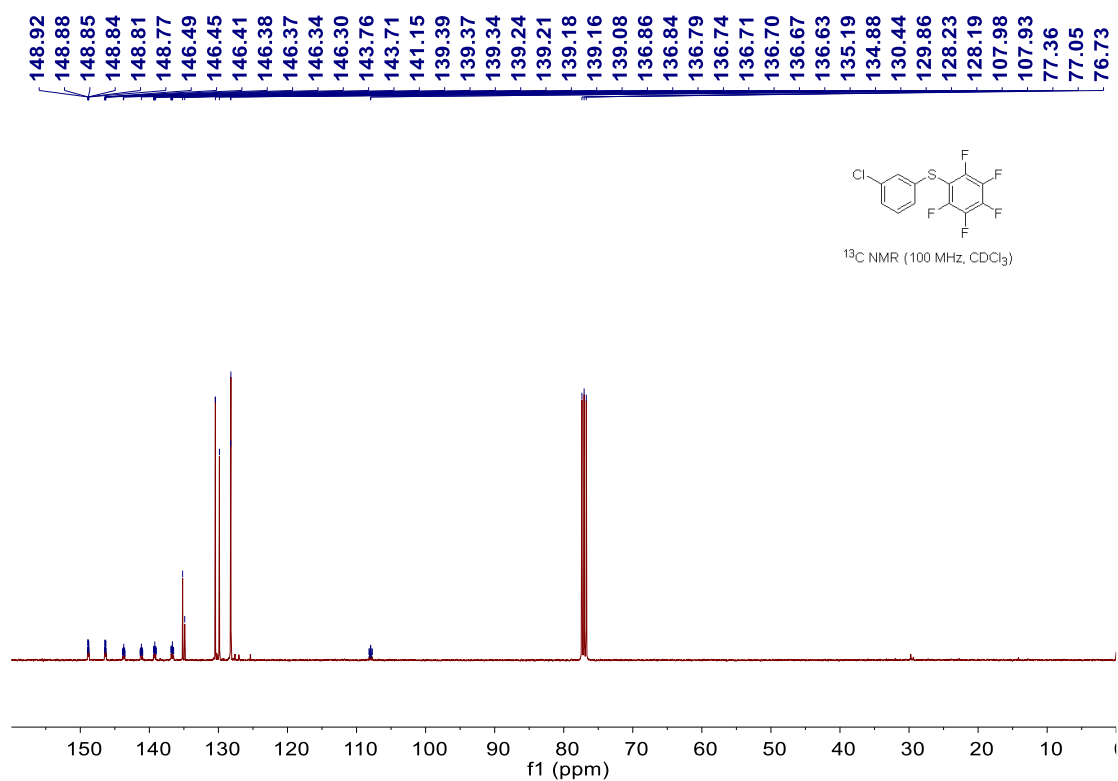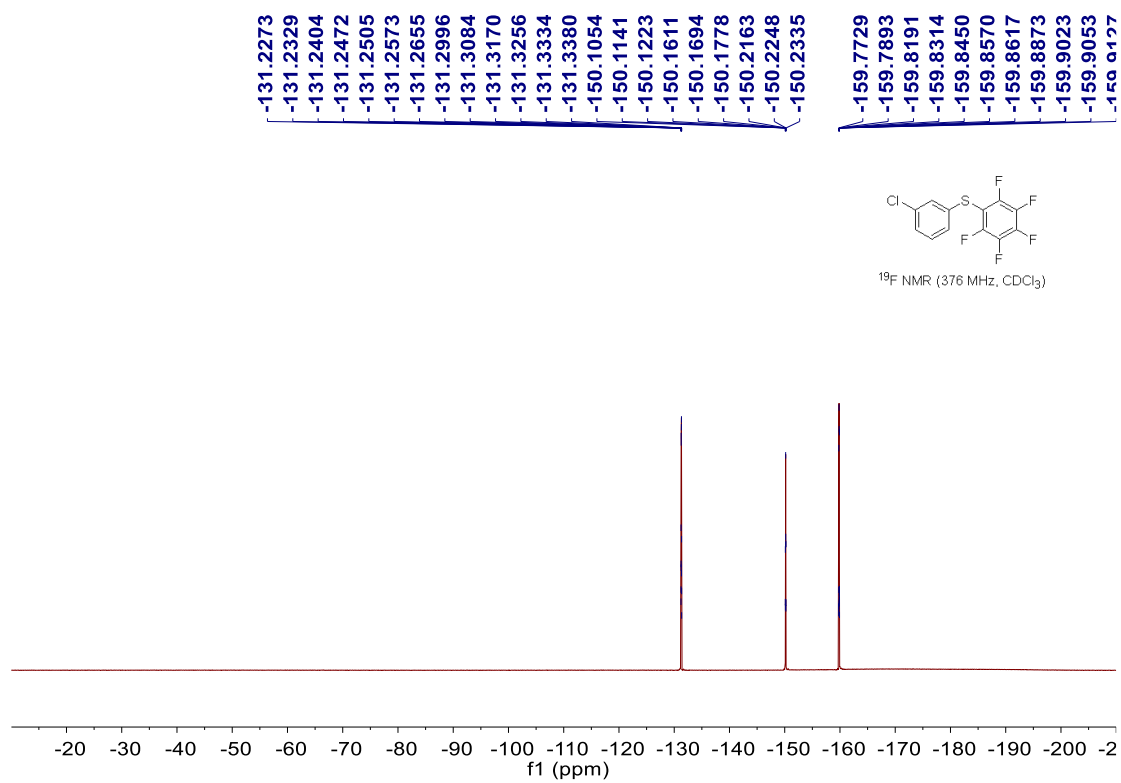

3i

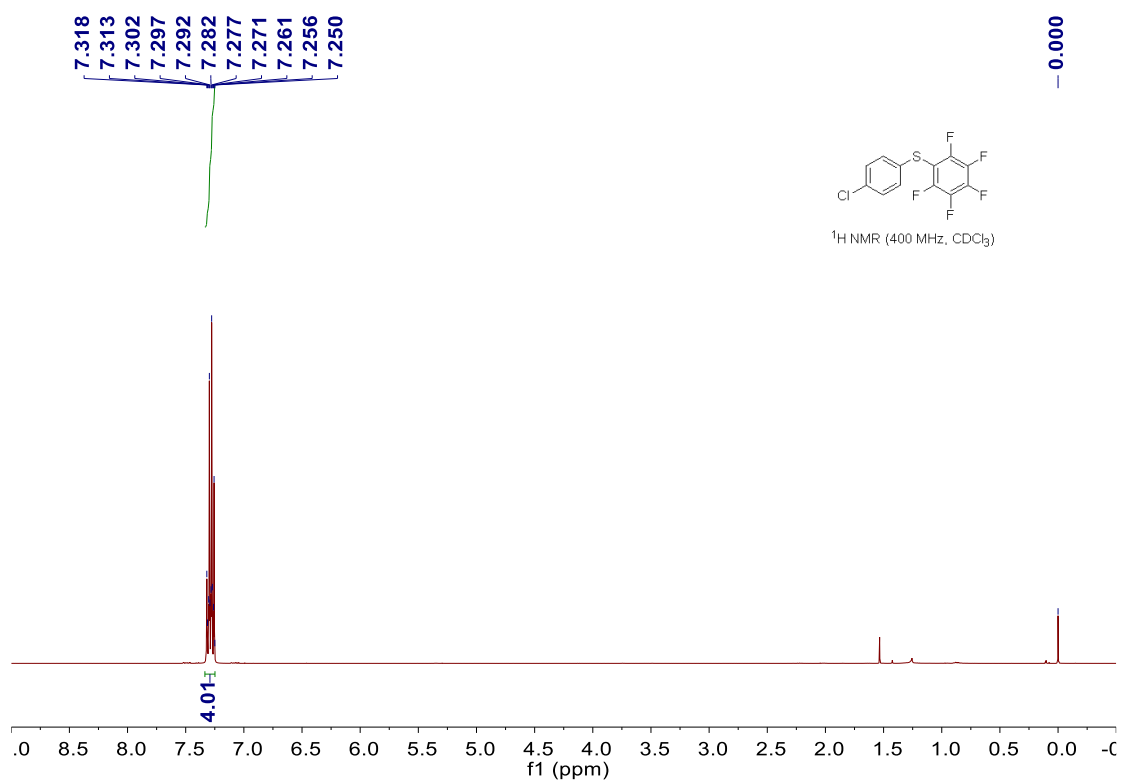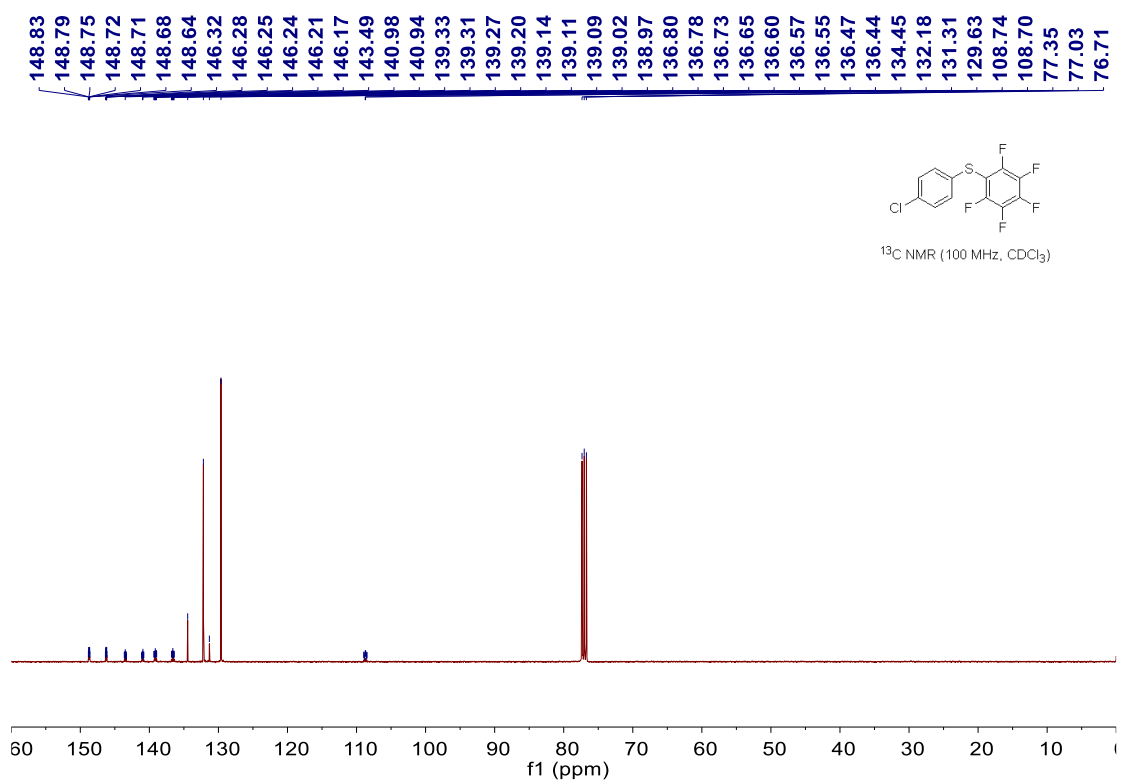

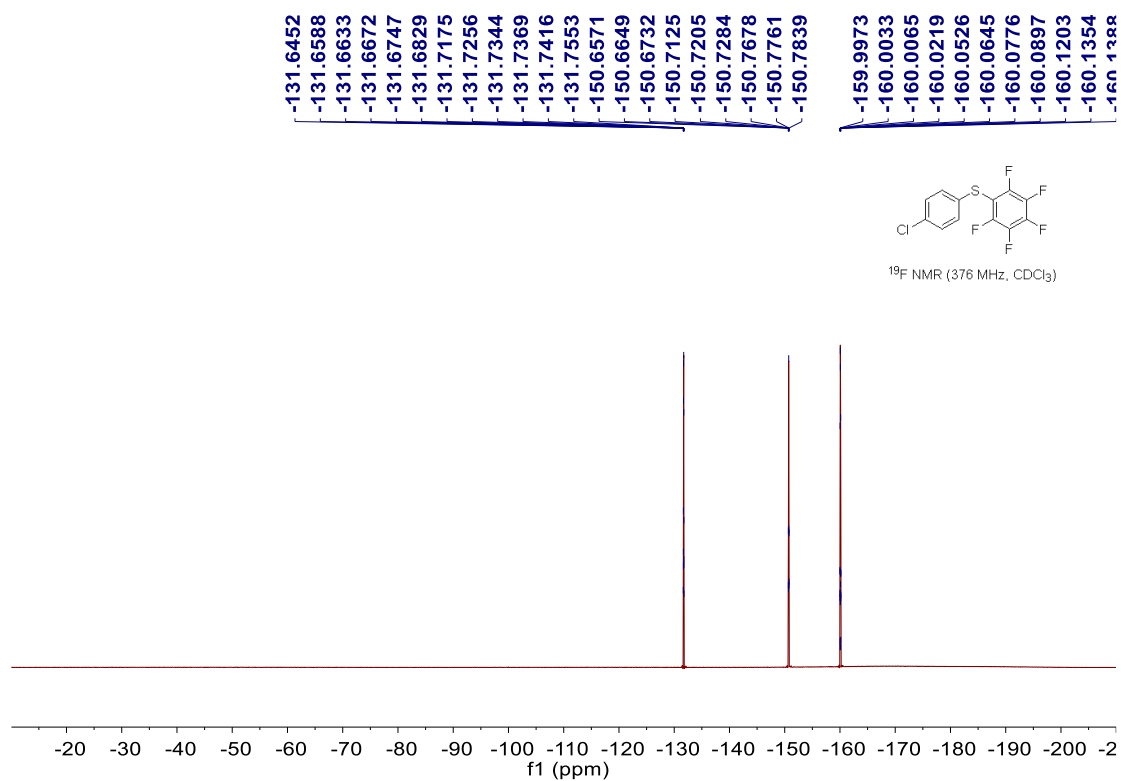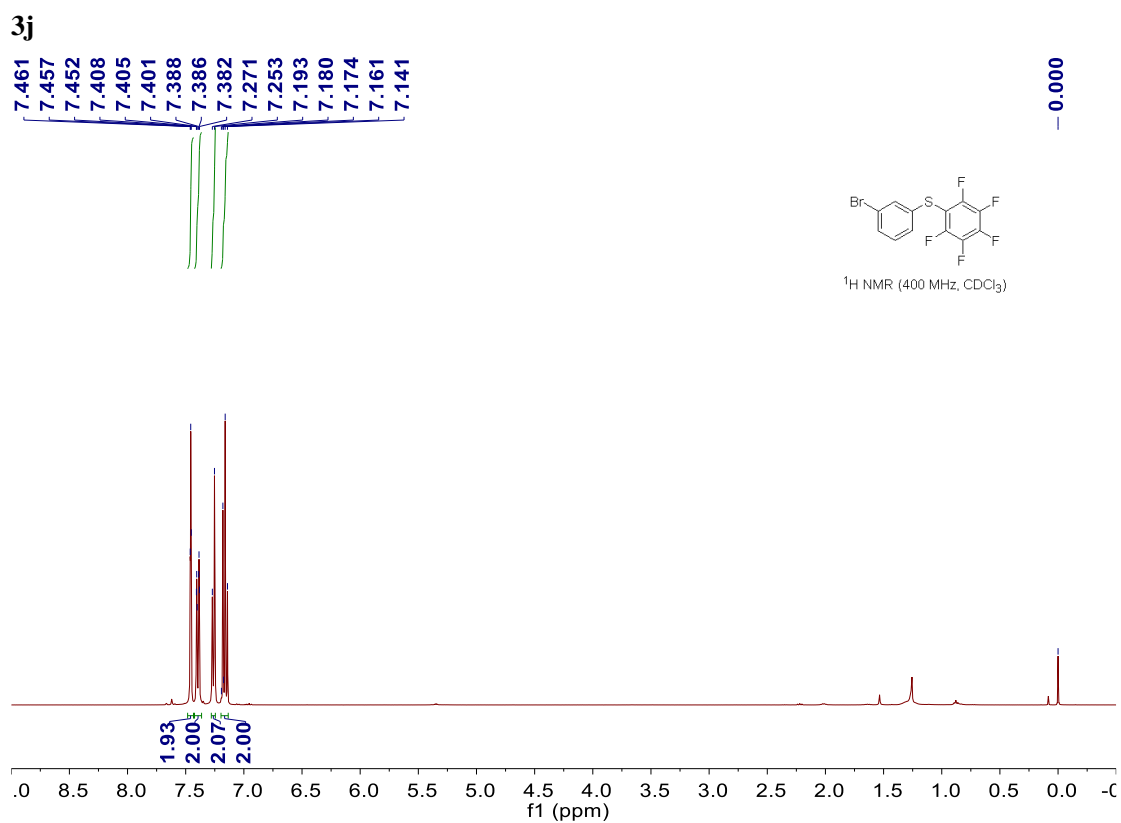

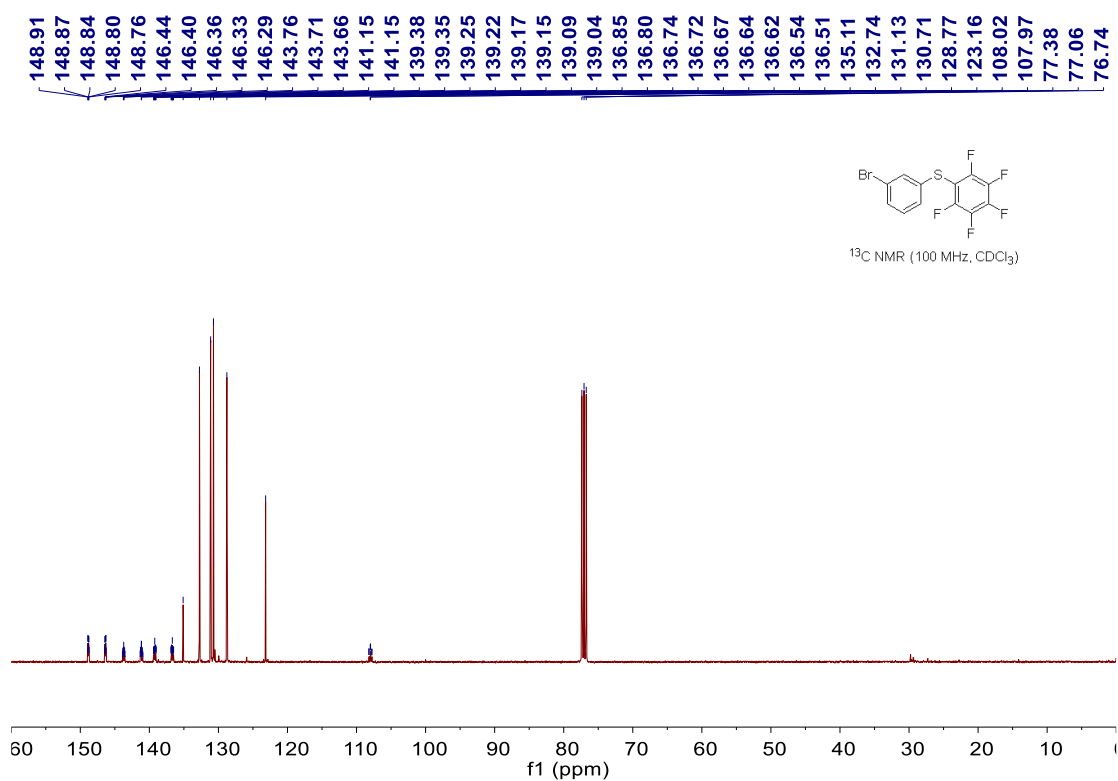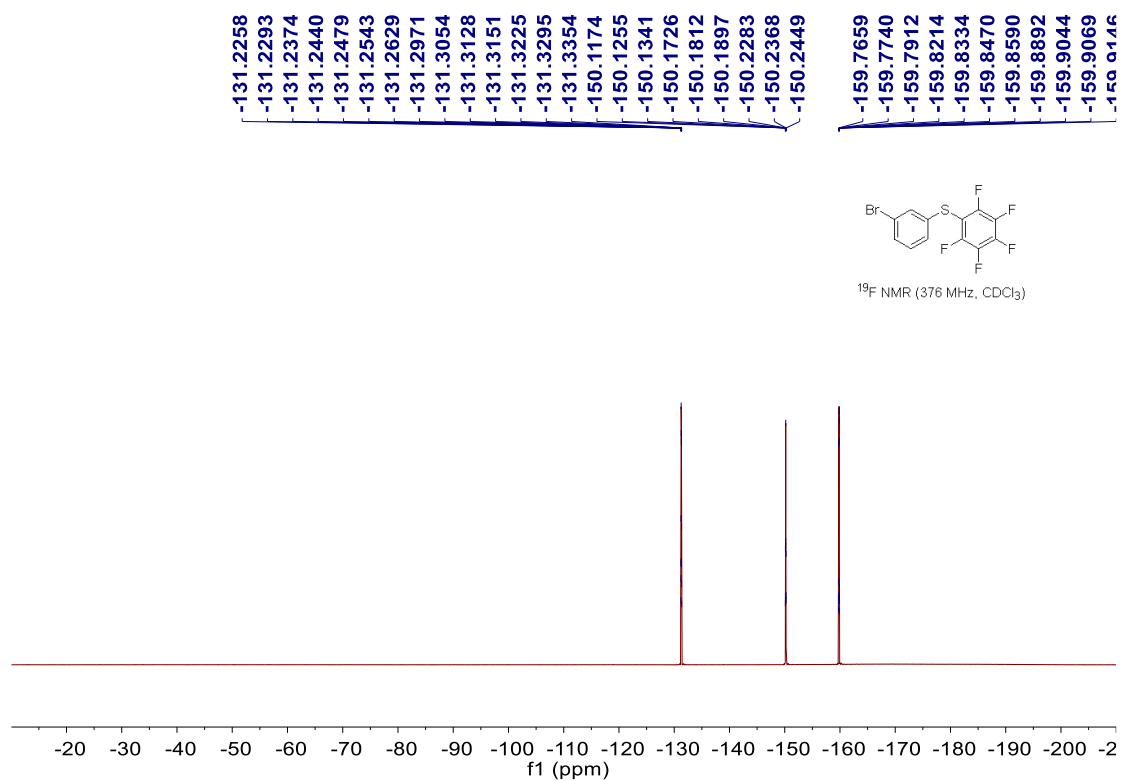



3k

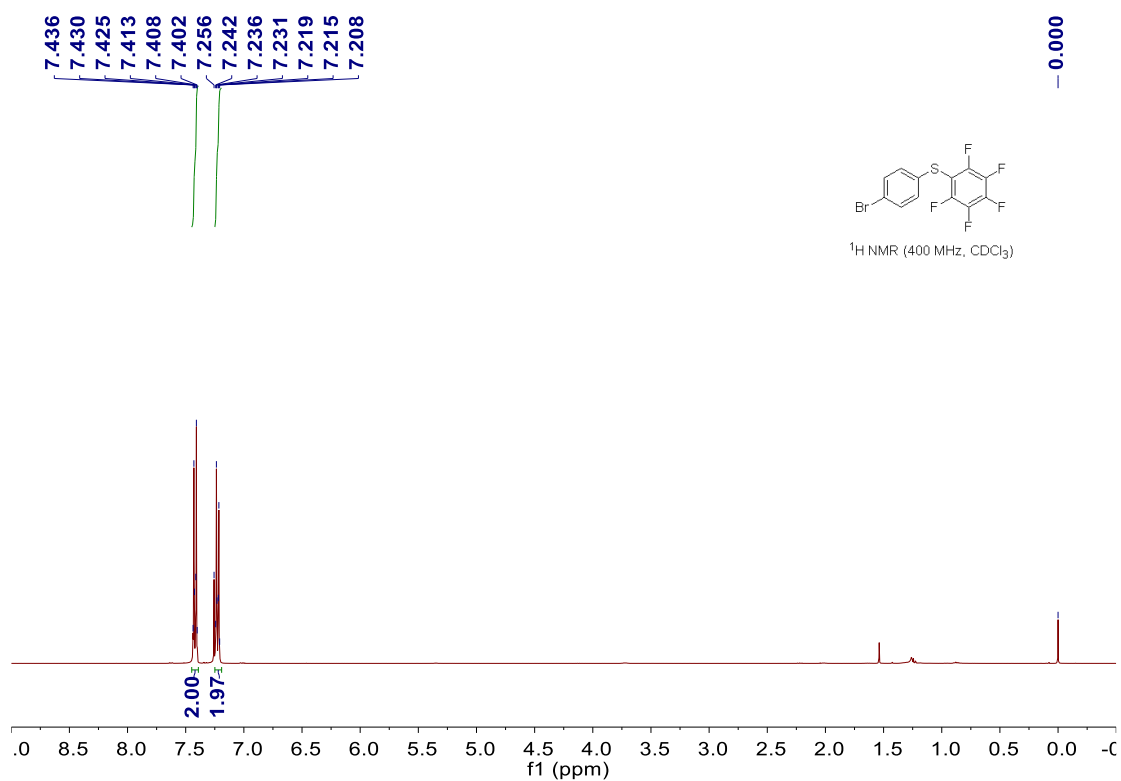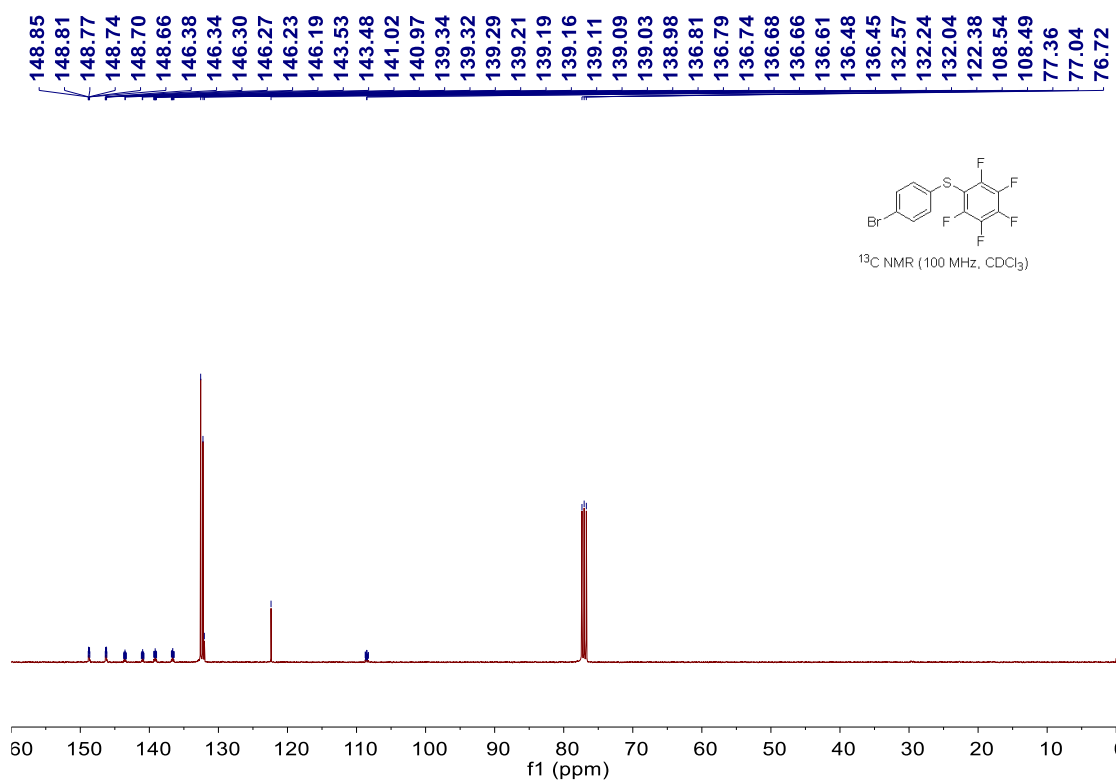

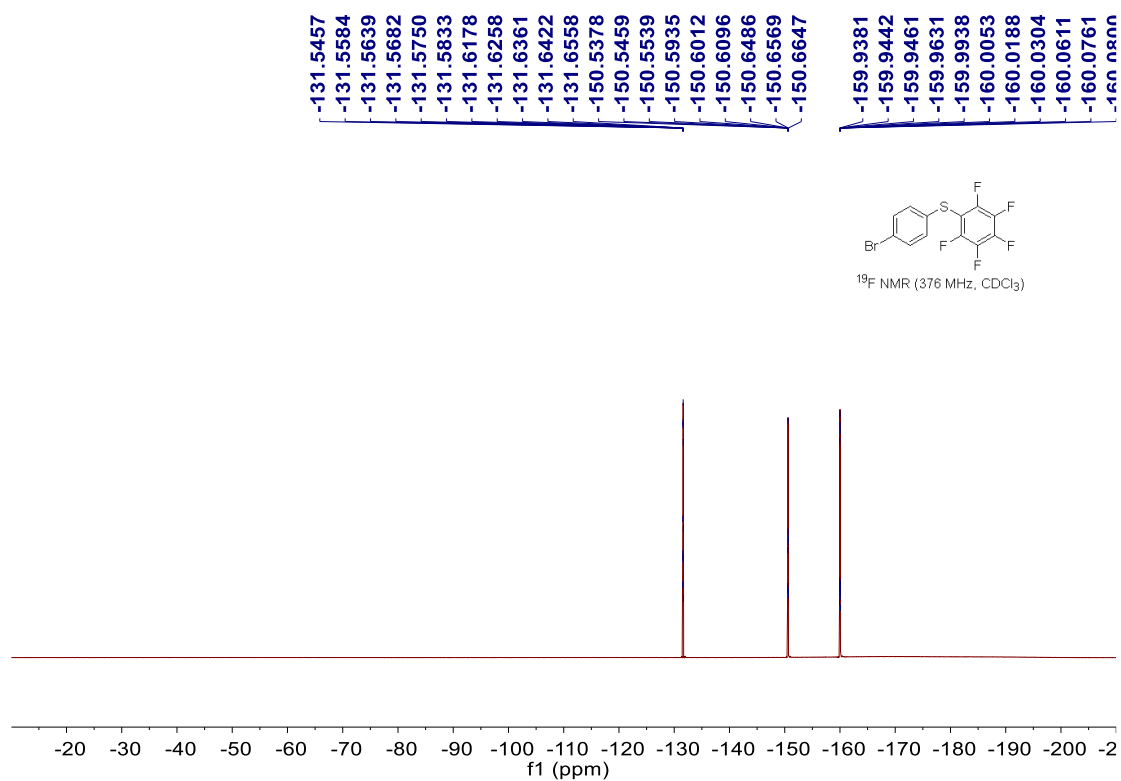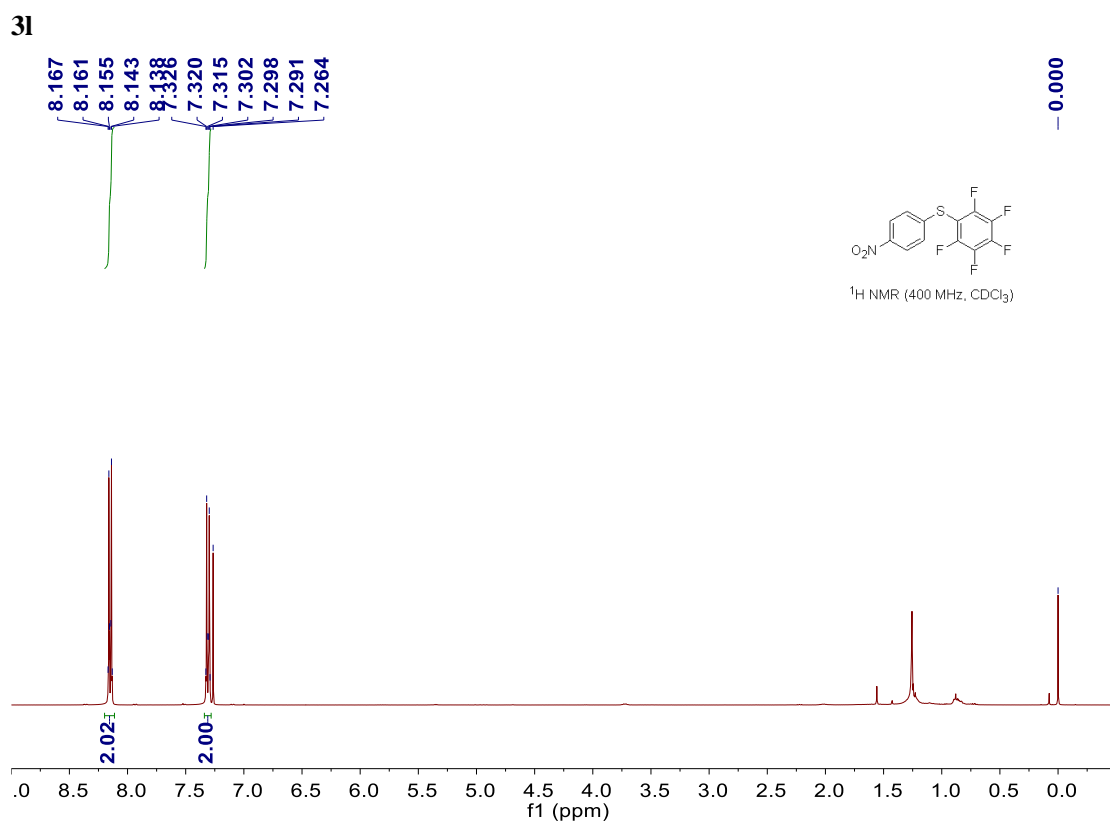

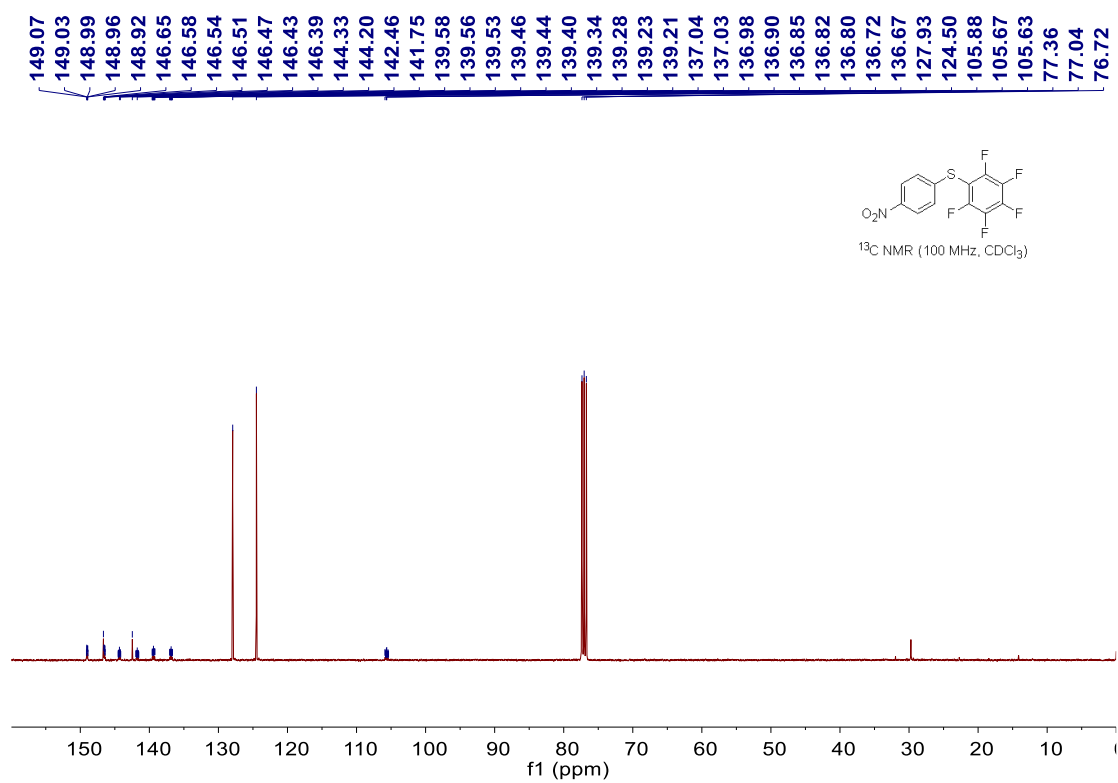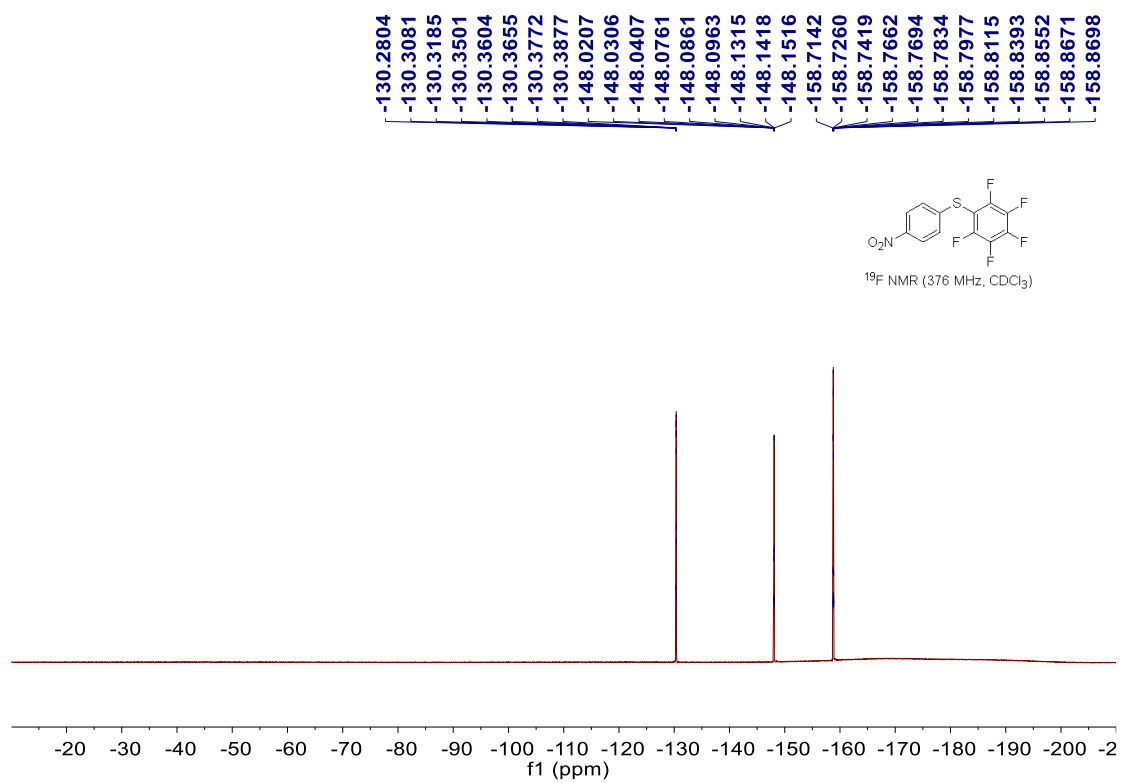

3m

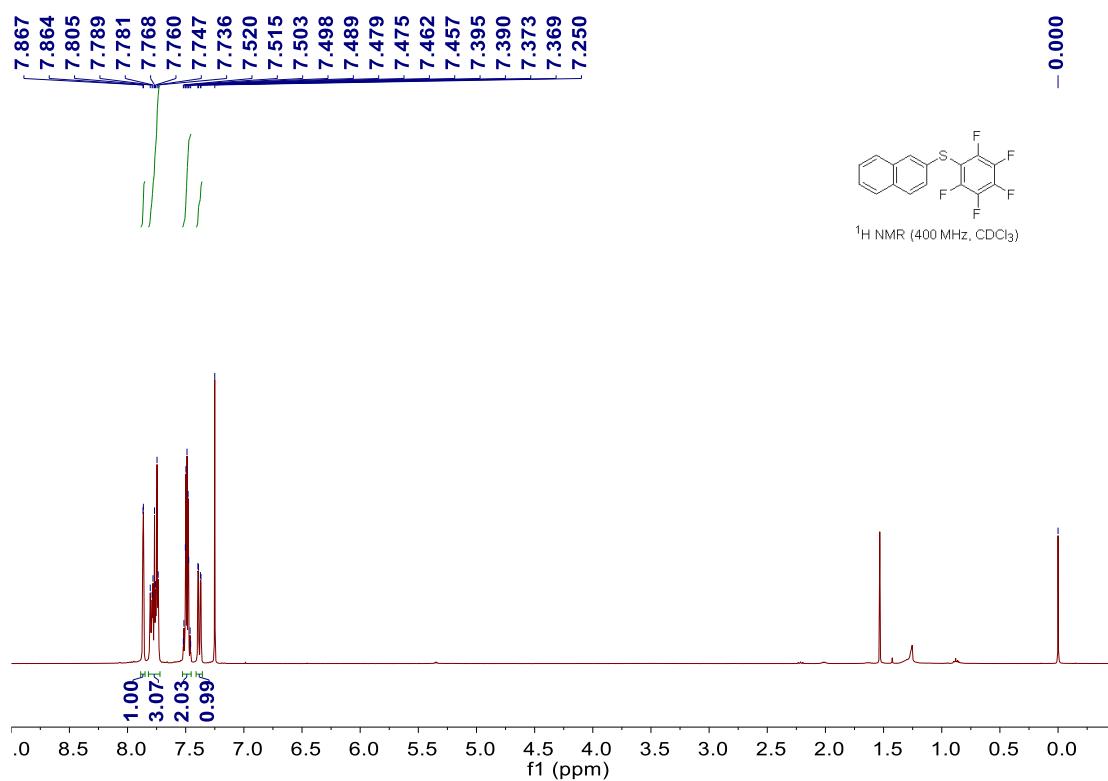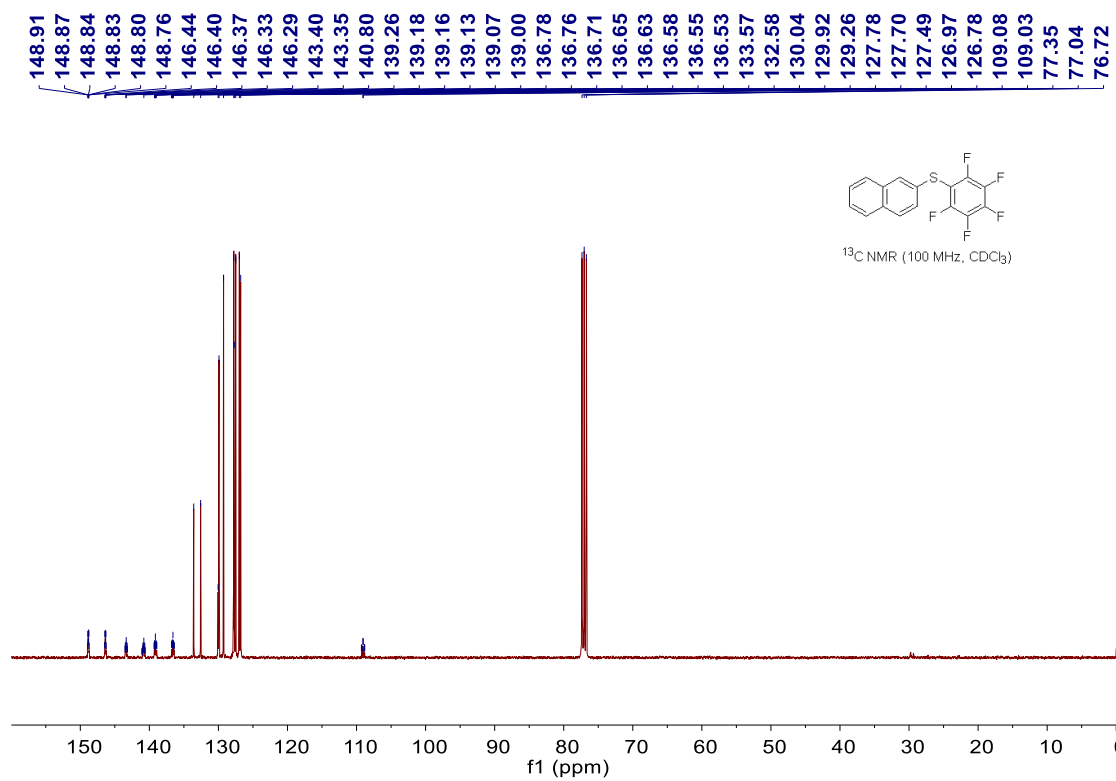

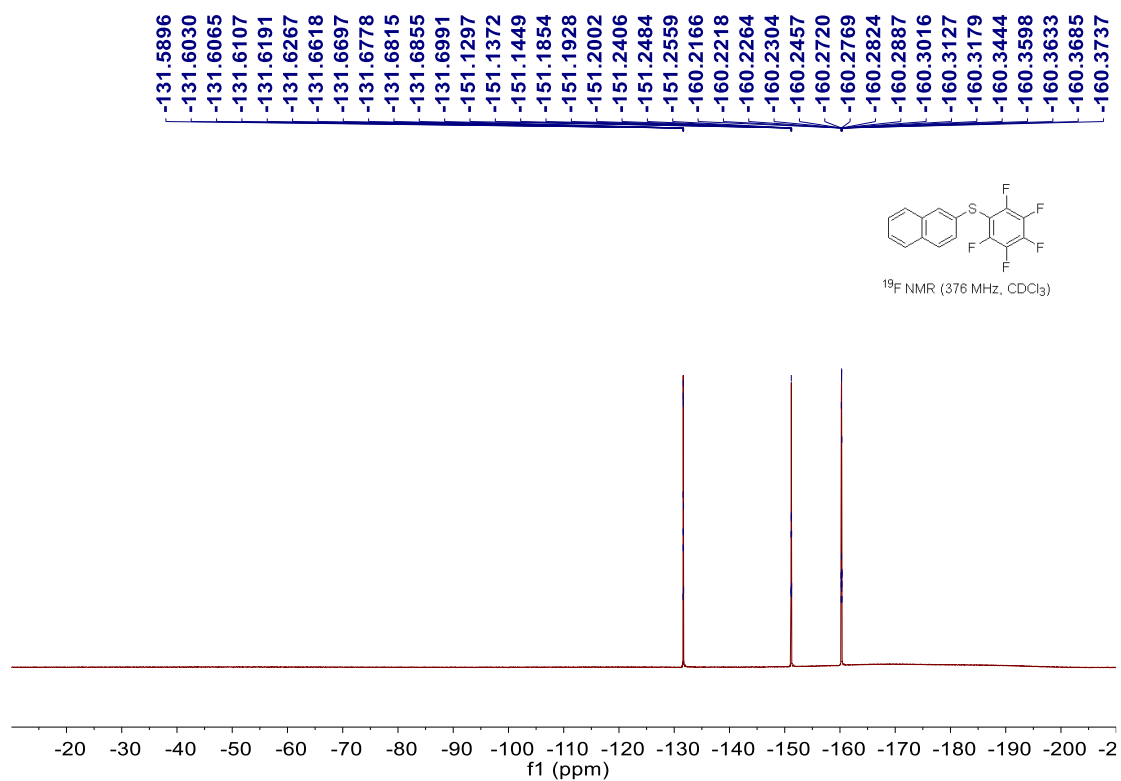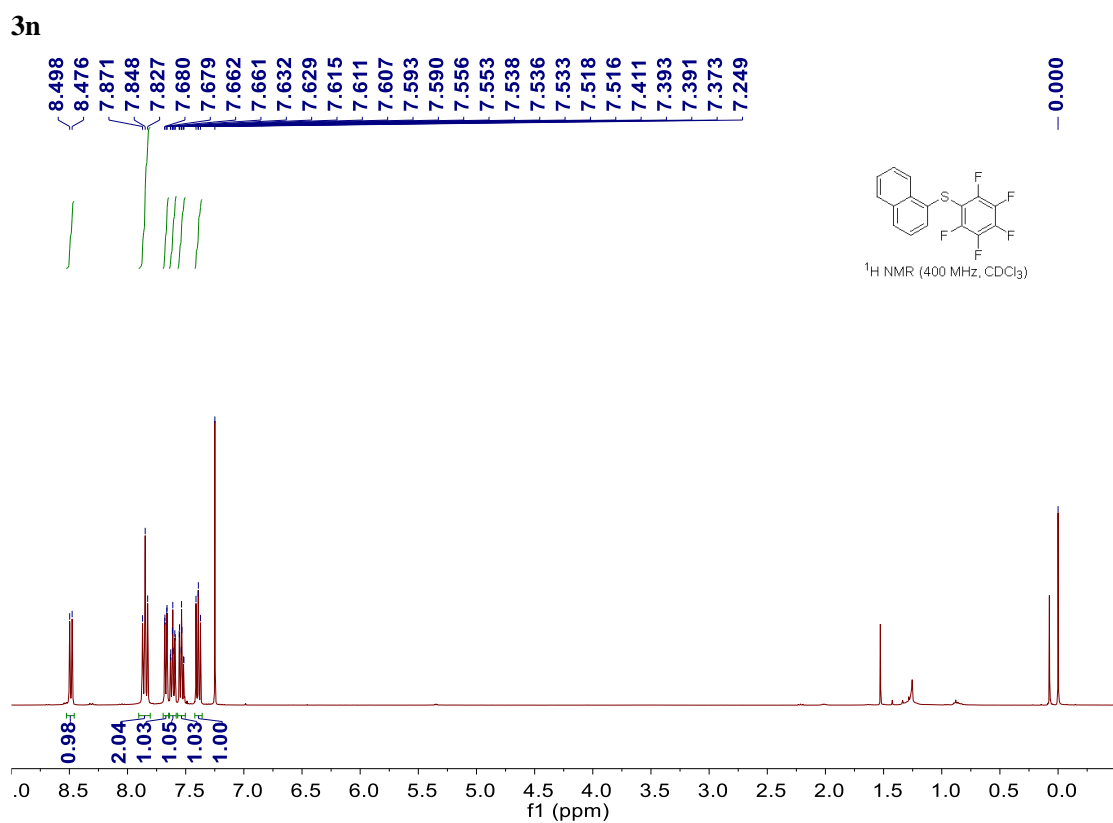

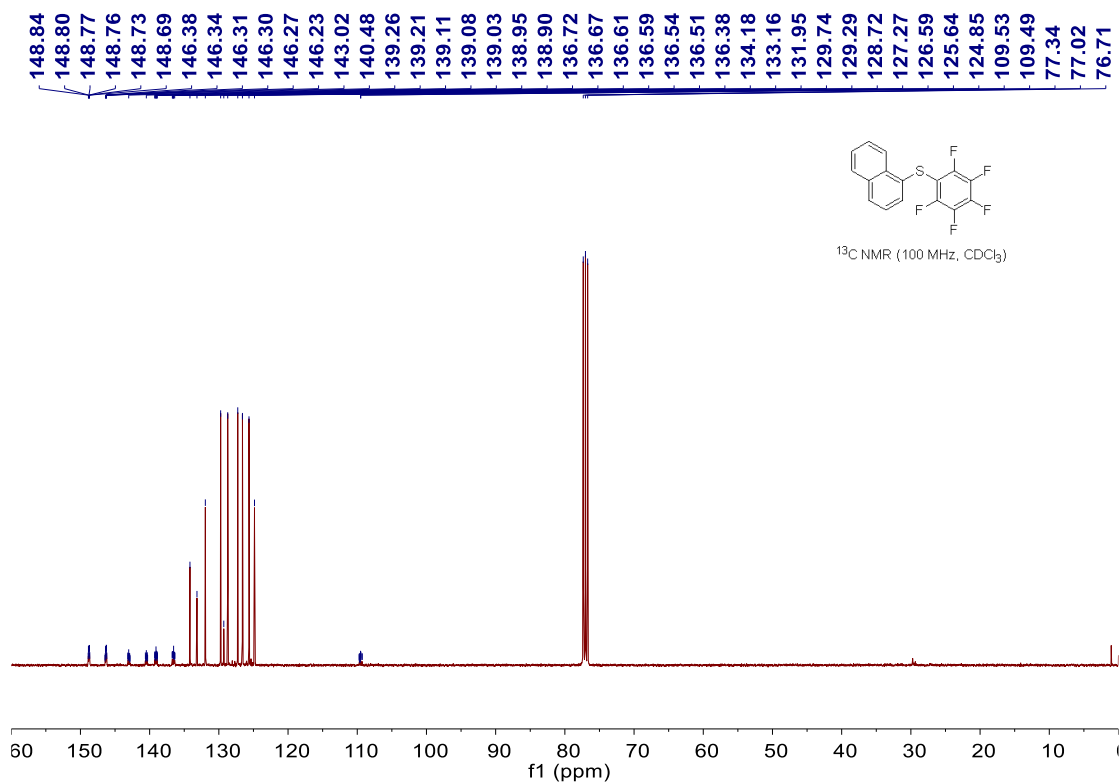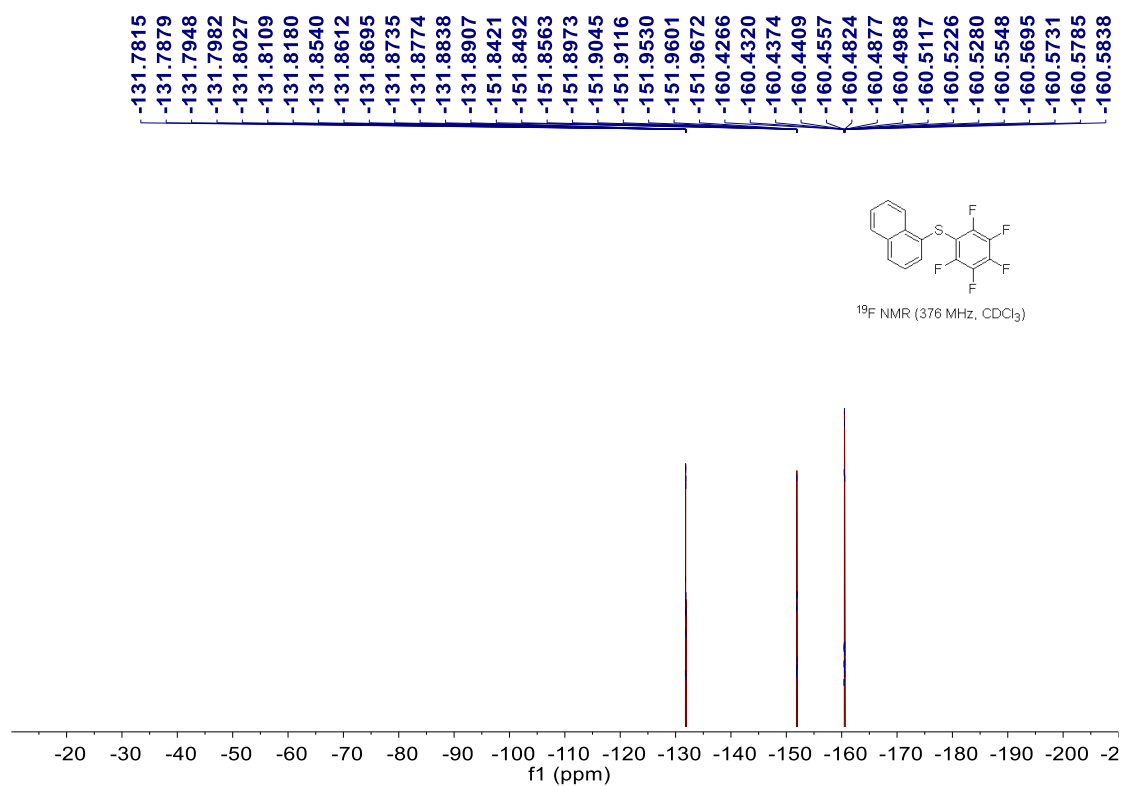

3o

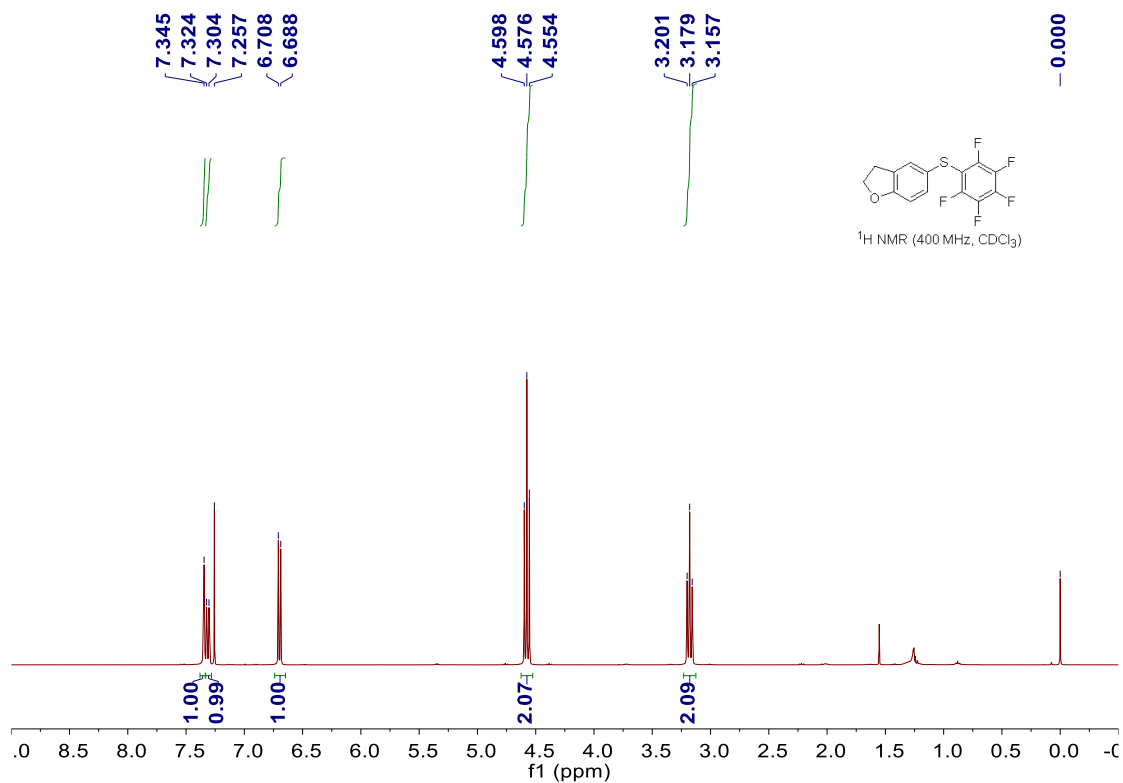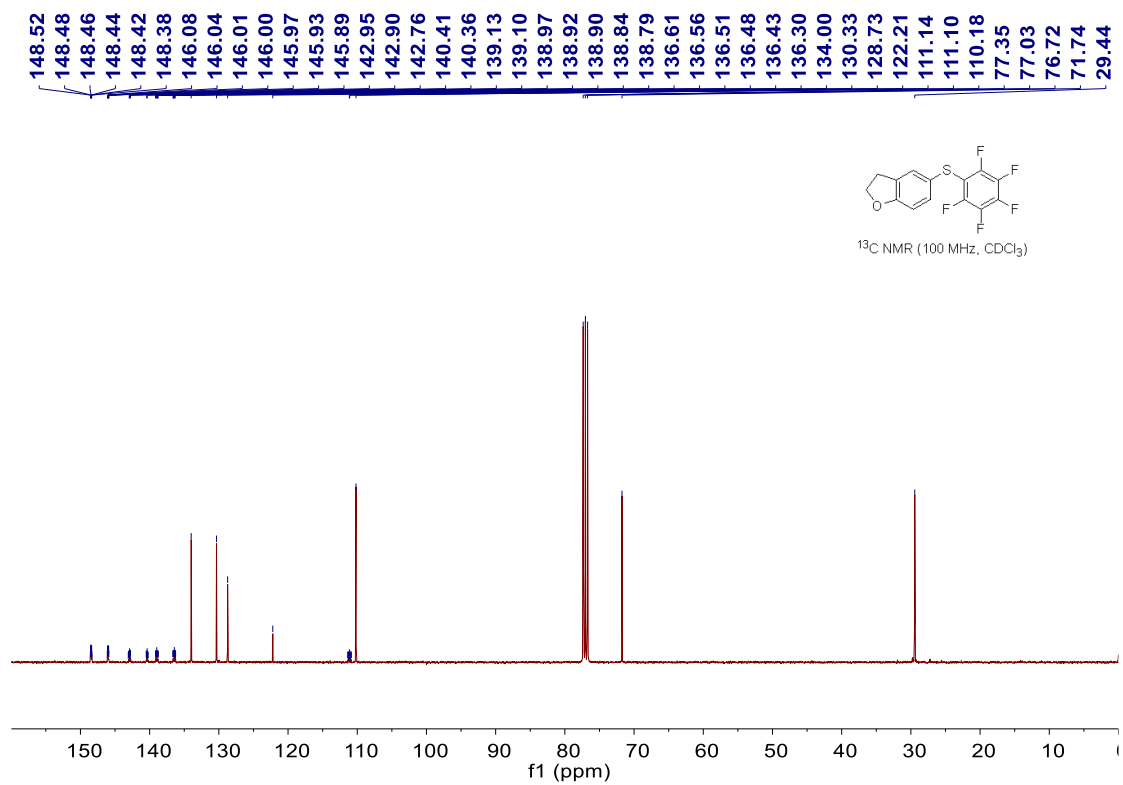

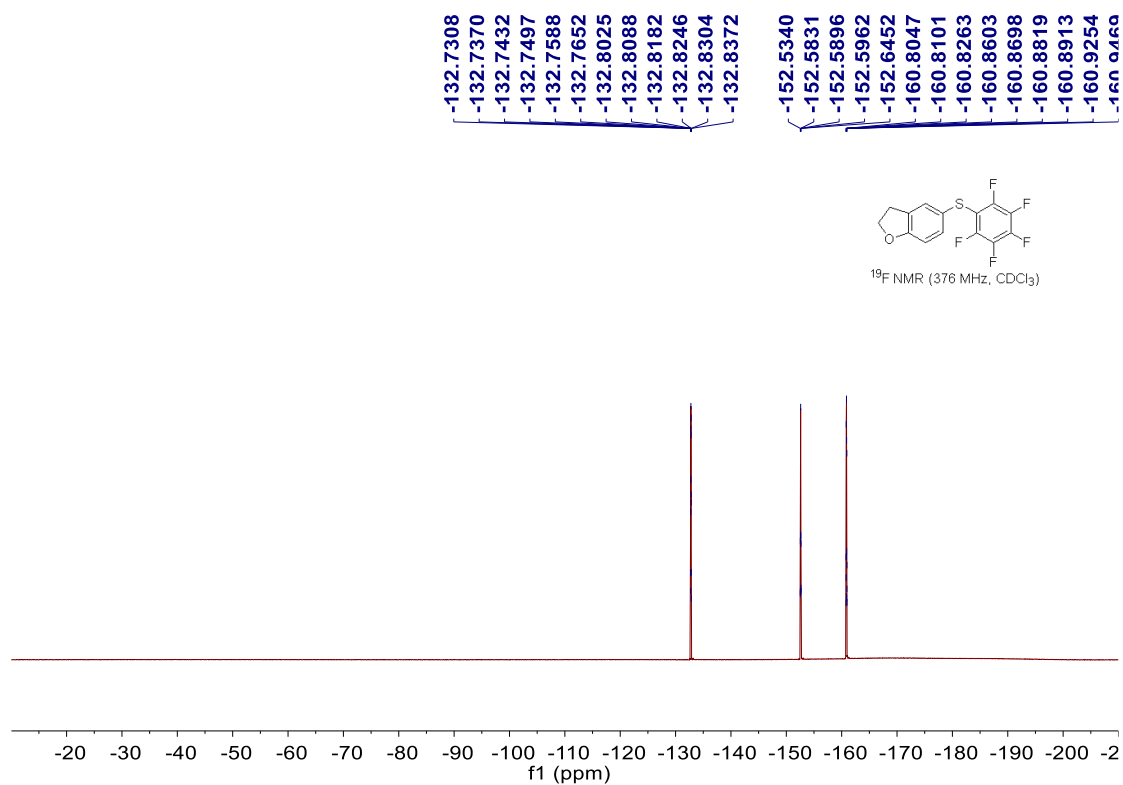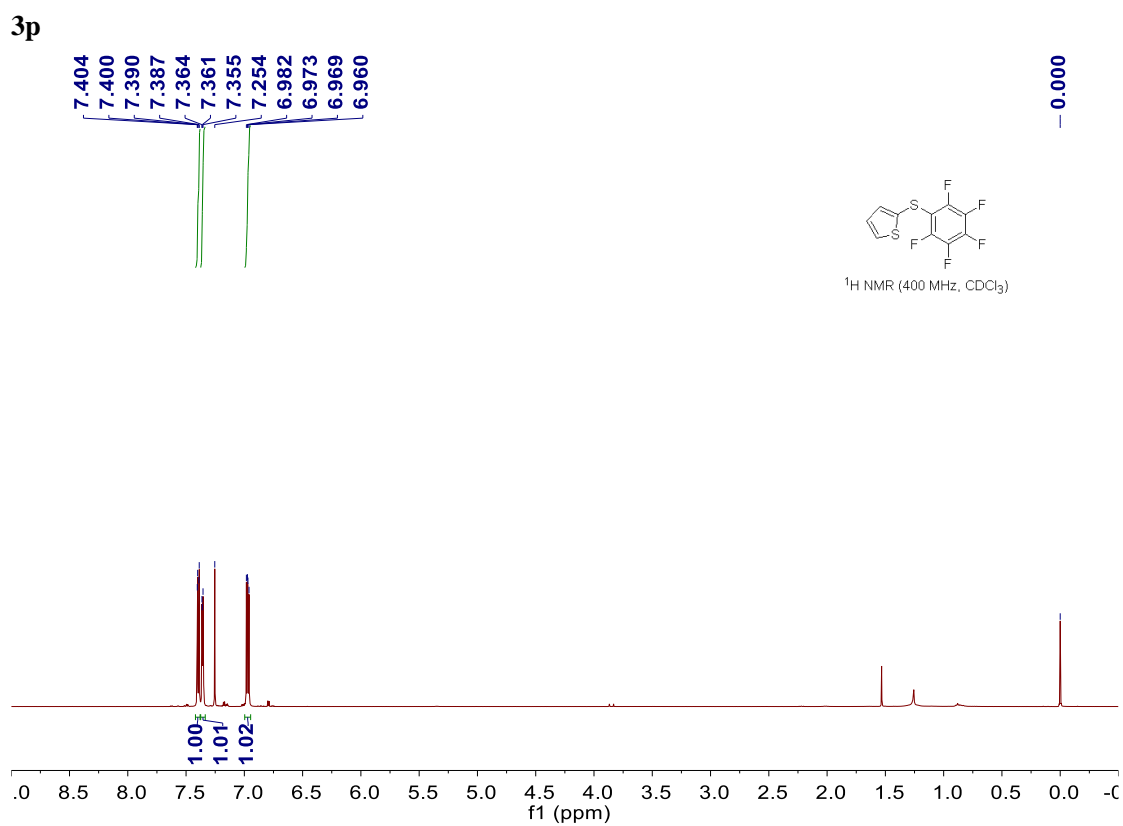



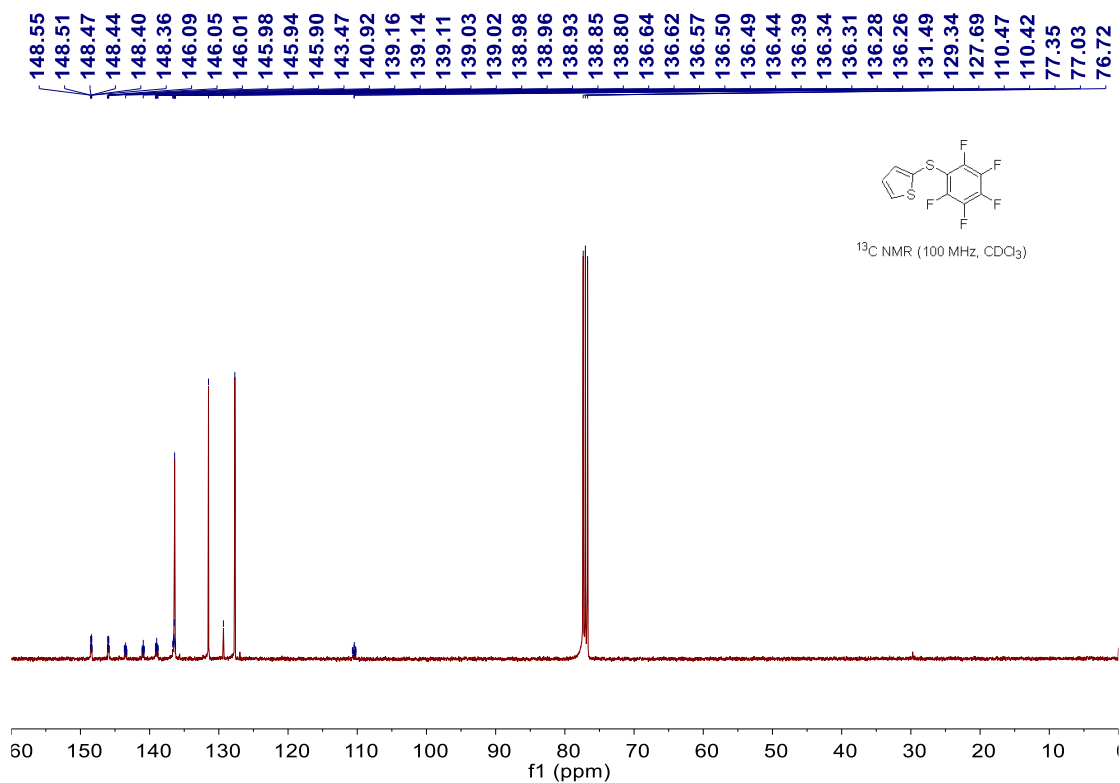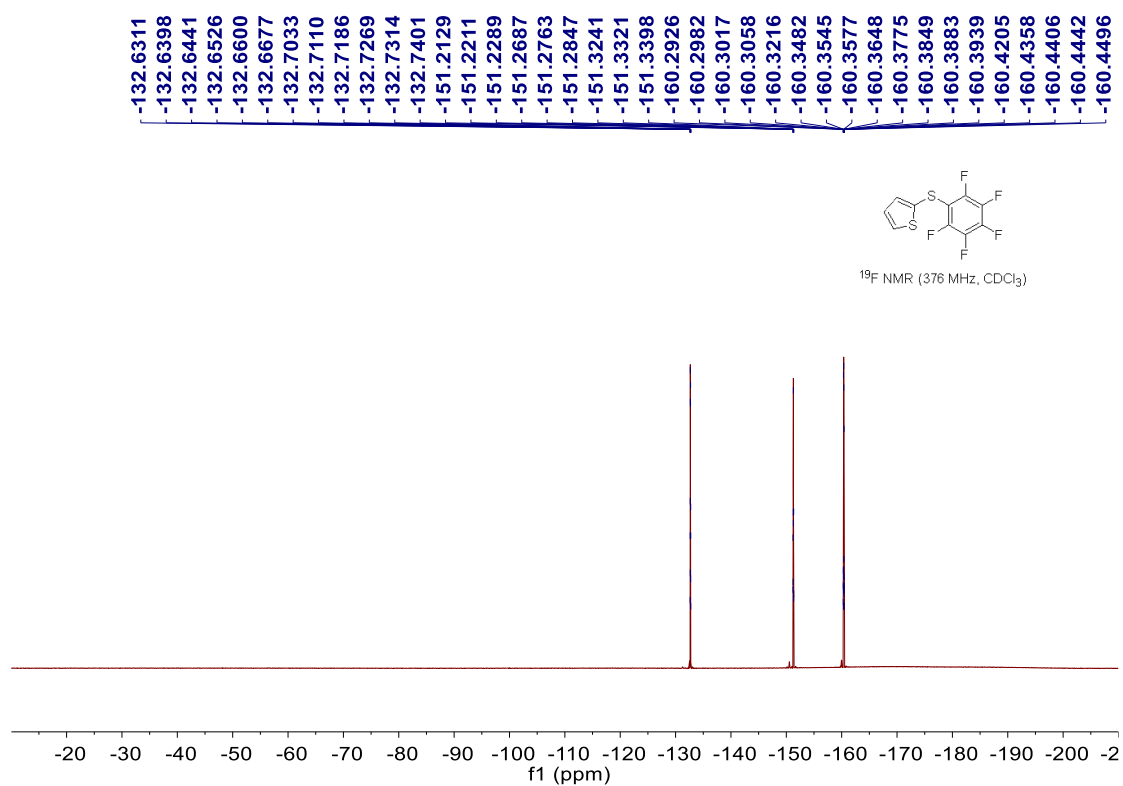

3q

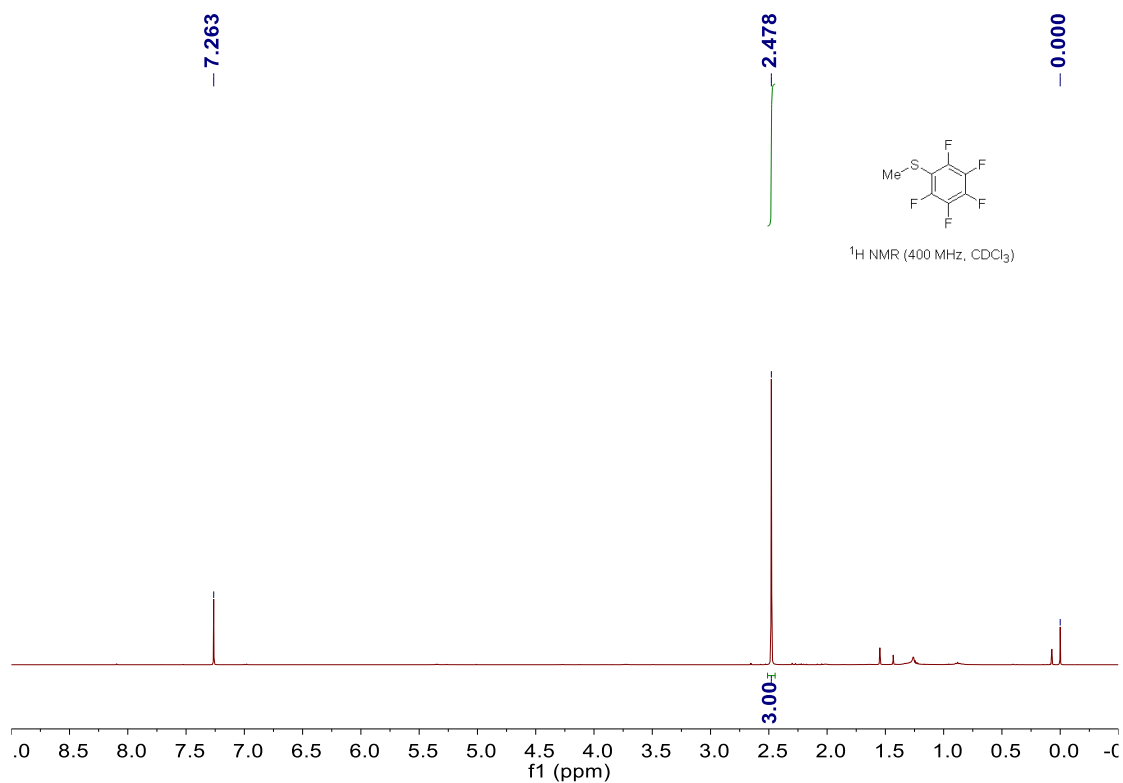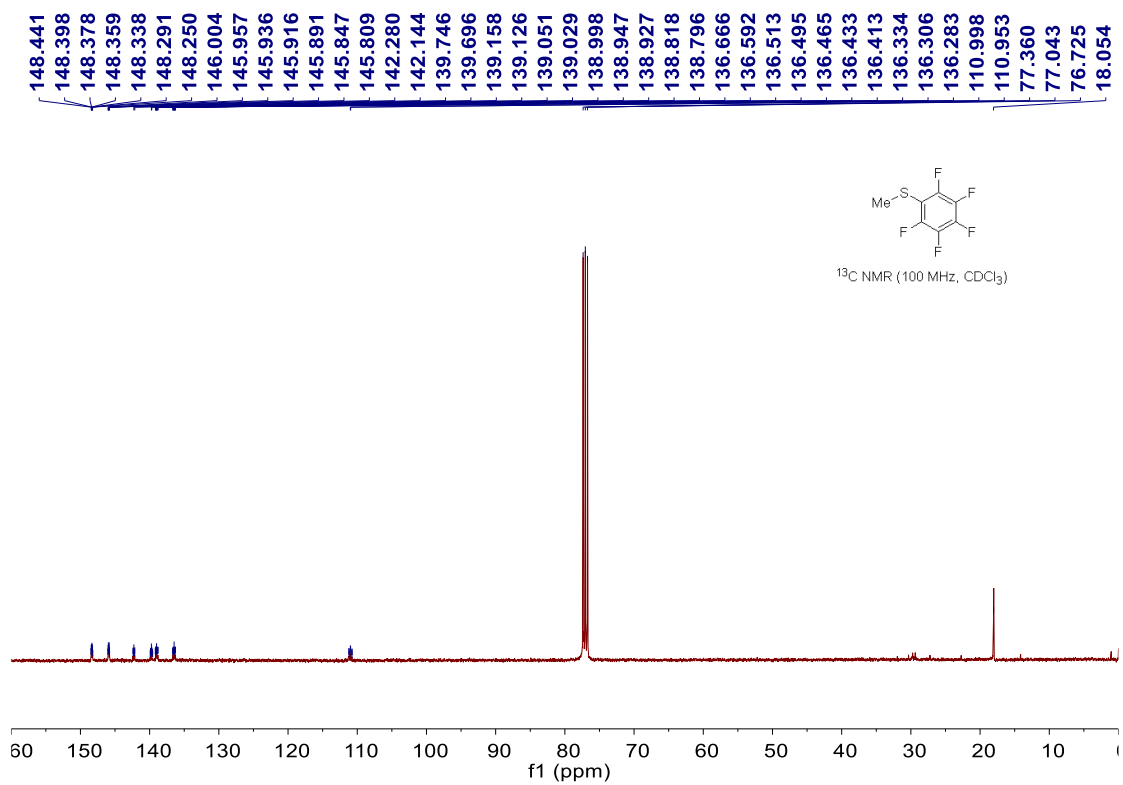

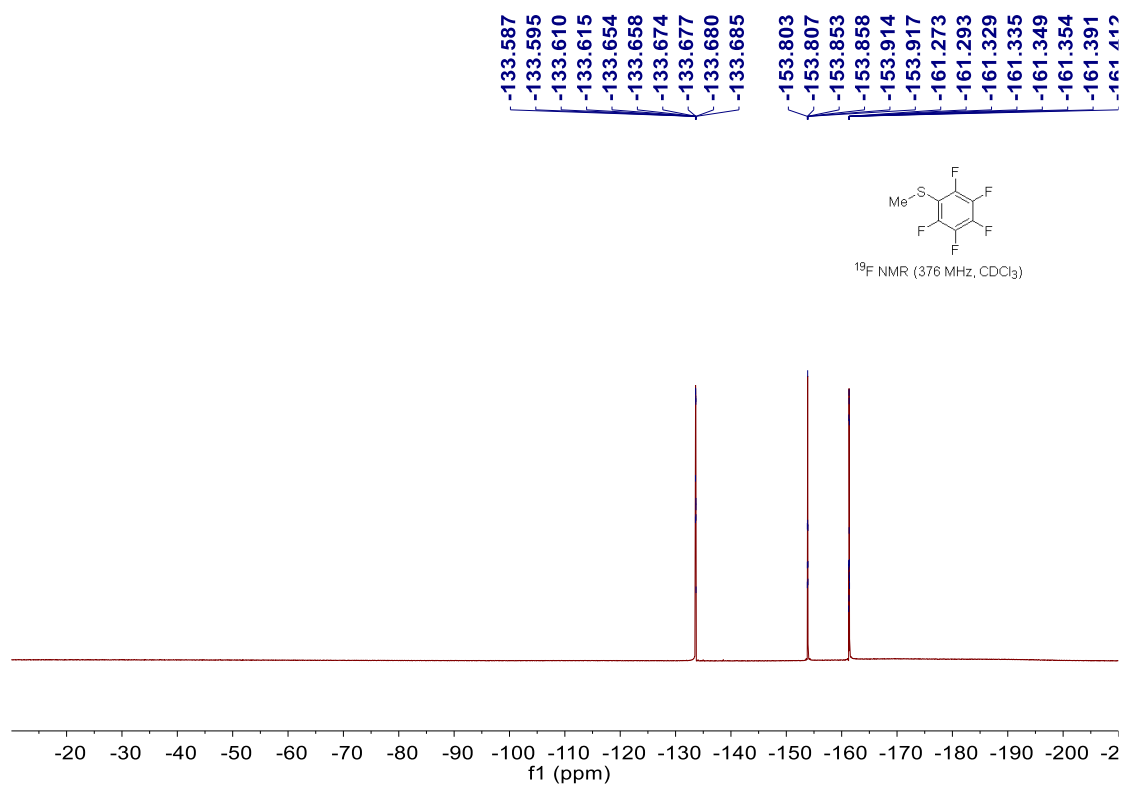

**3r**

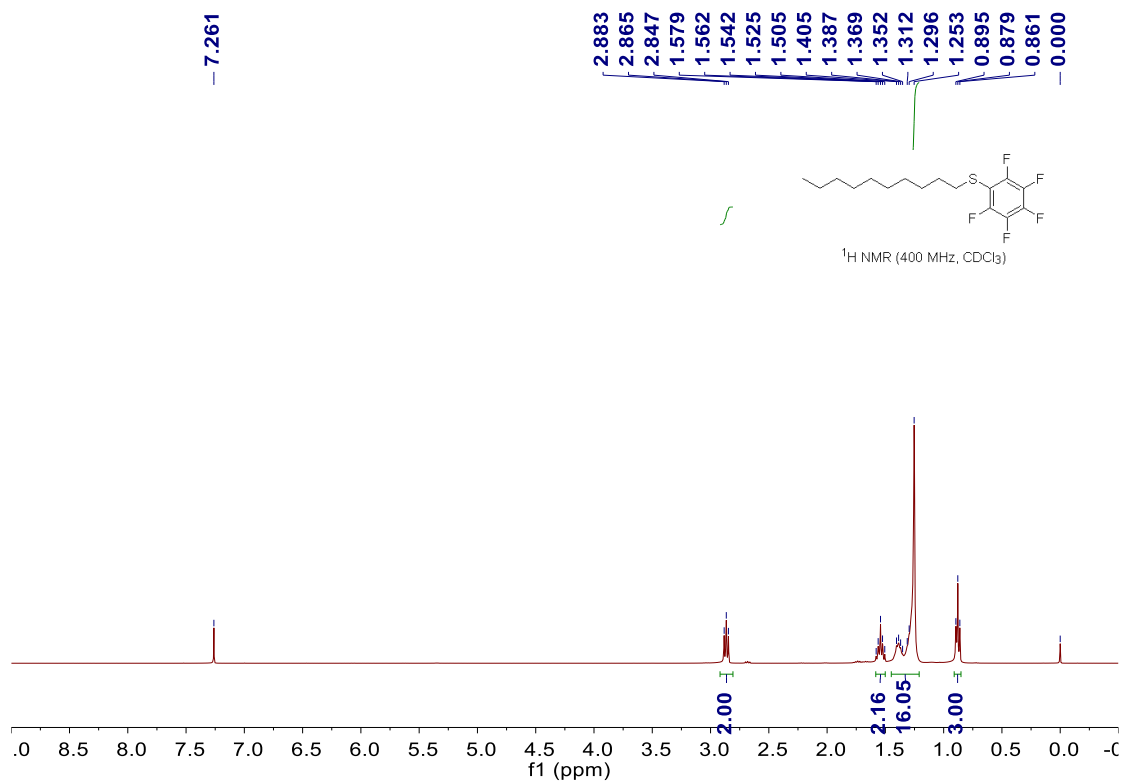

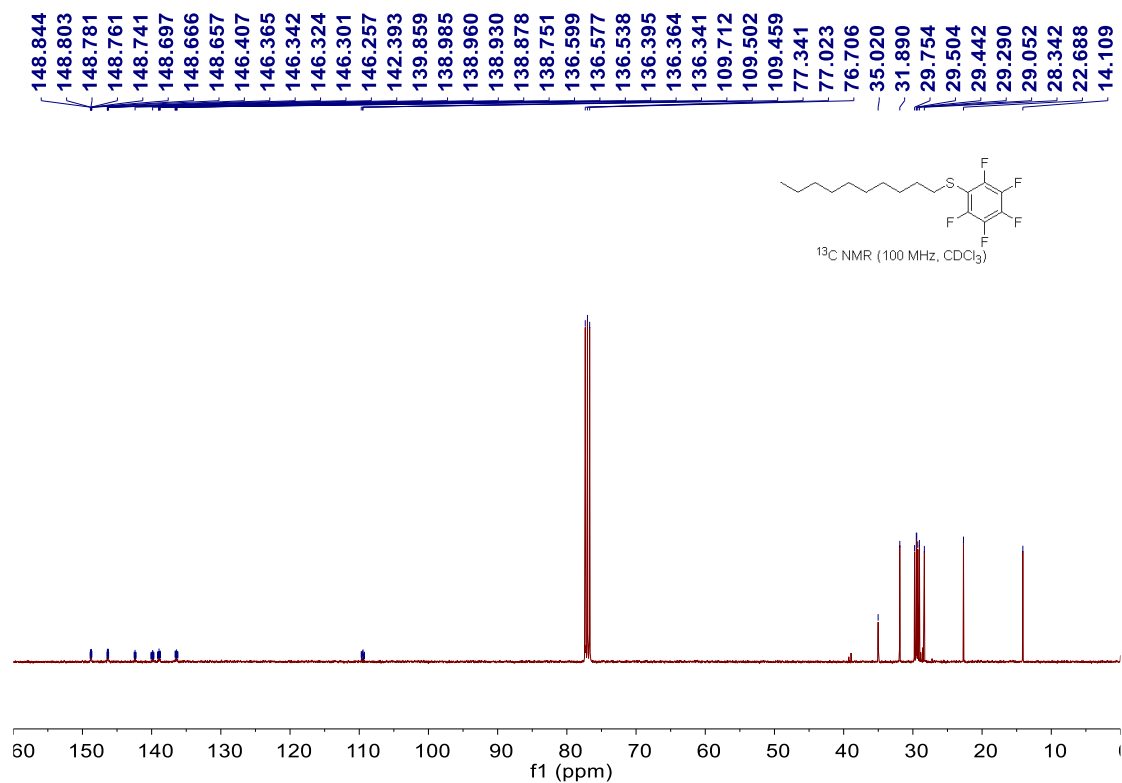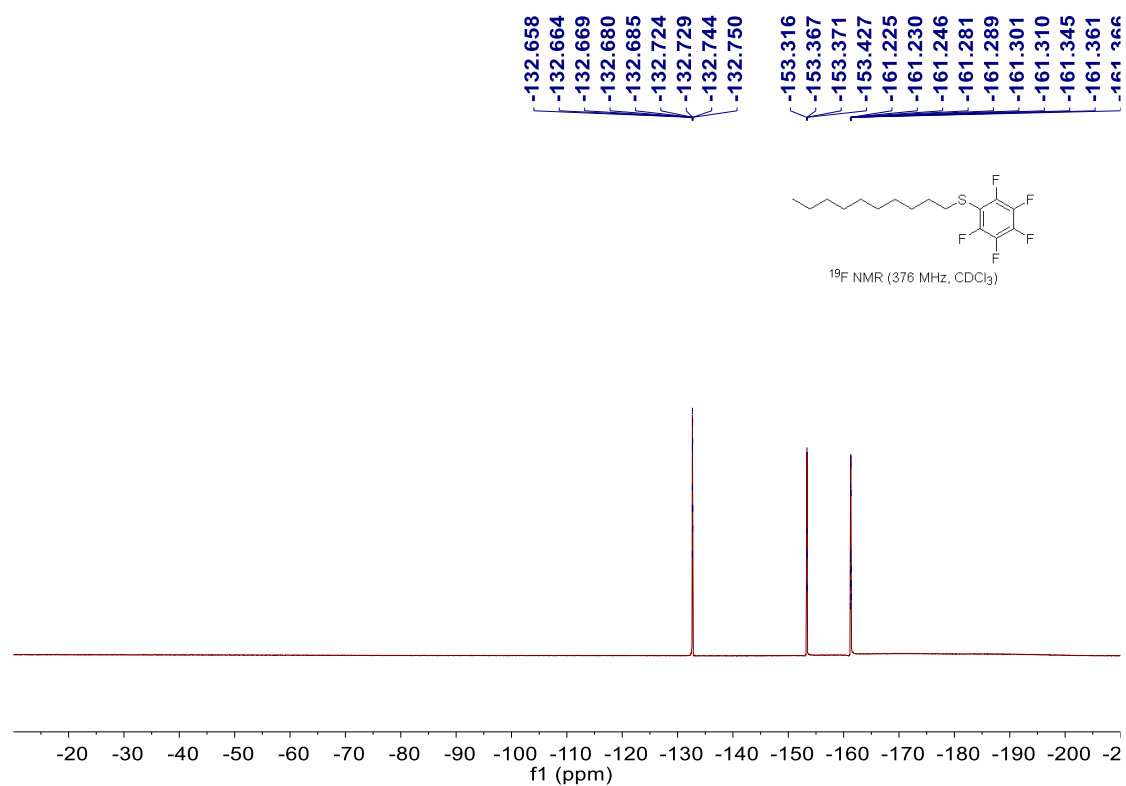

3s

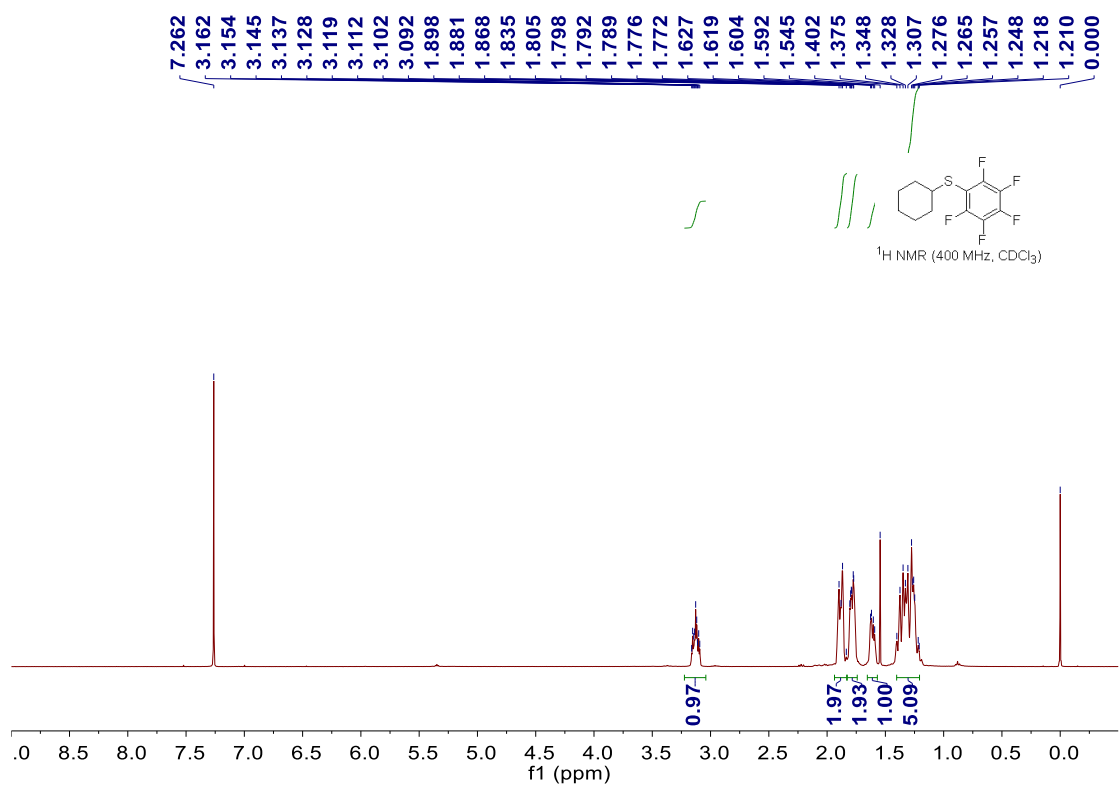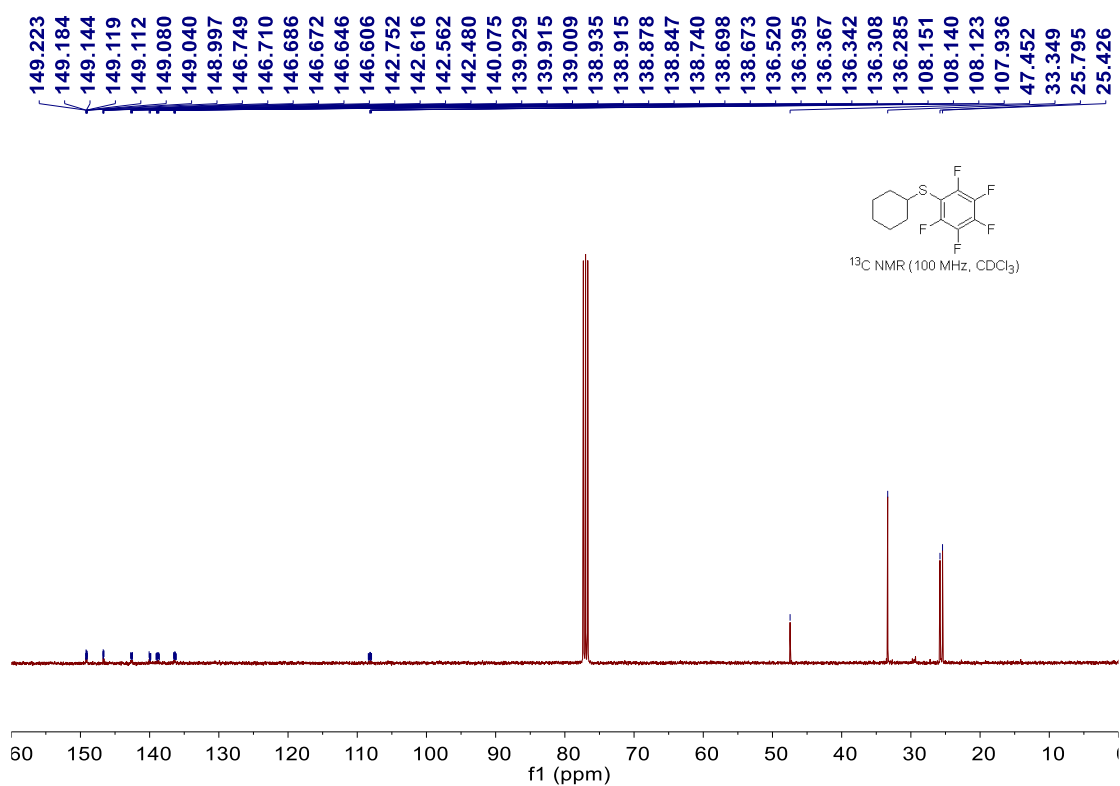

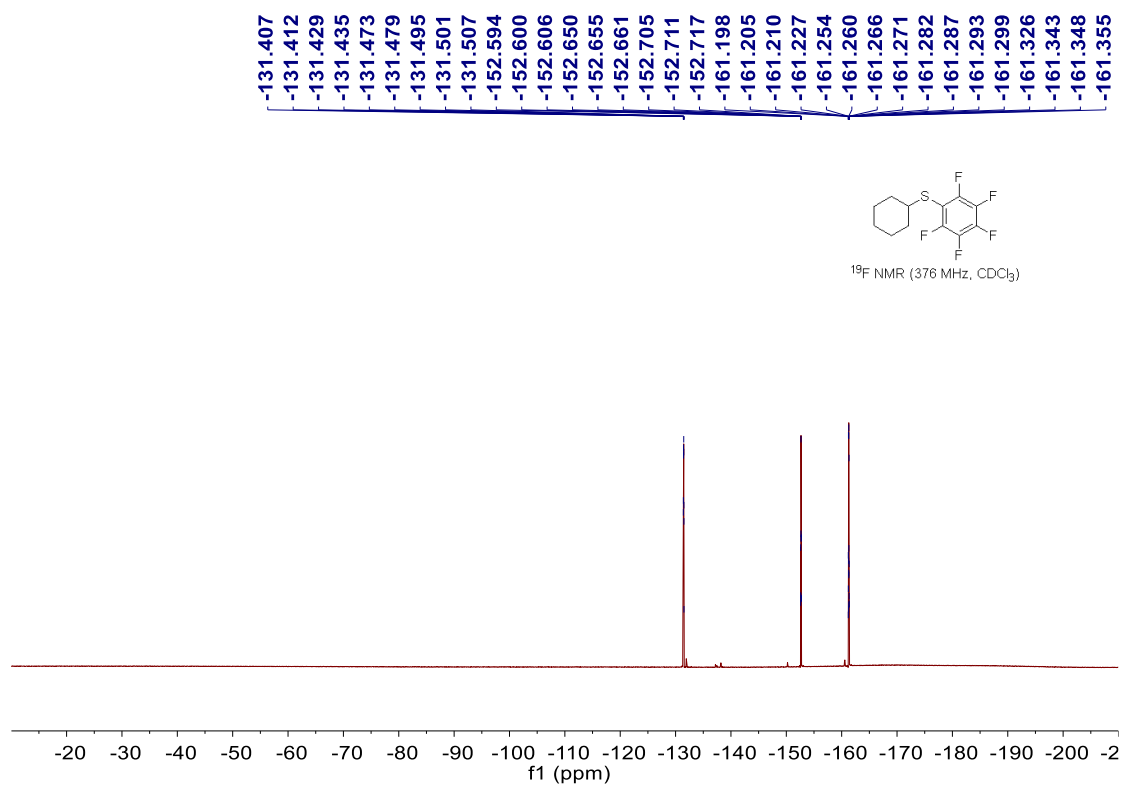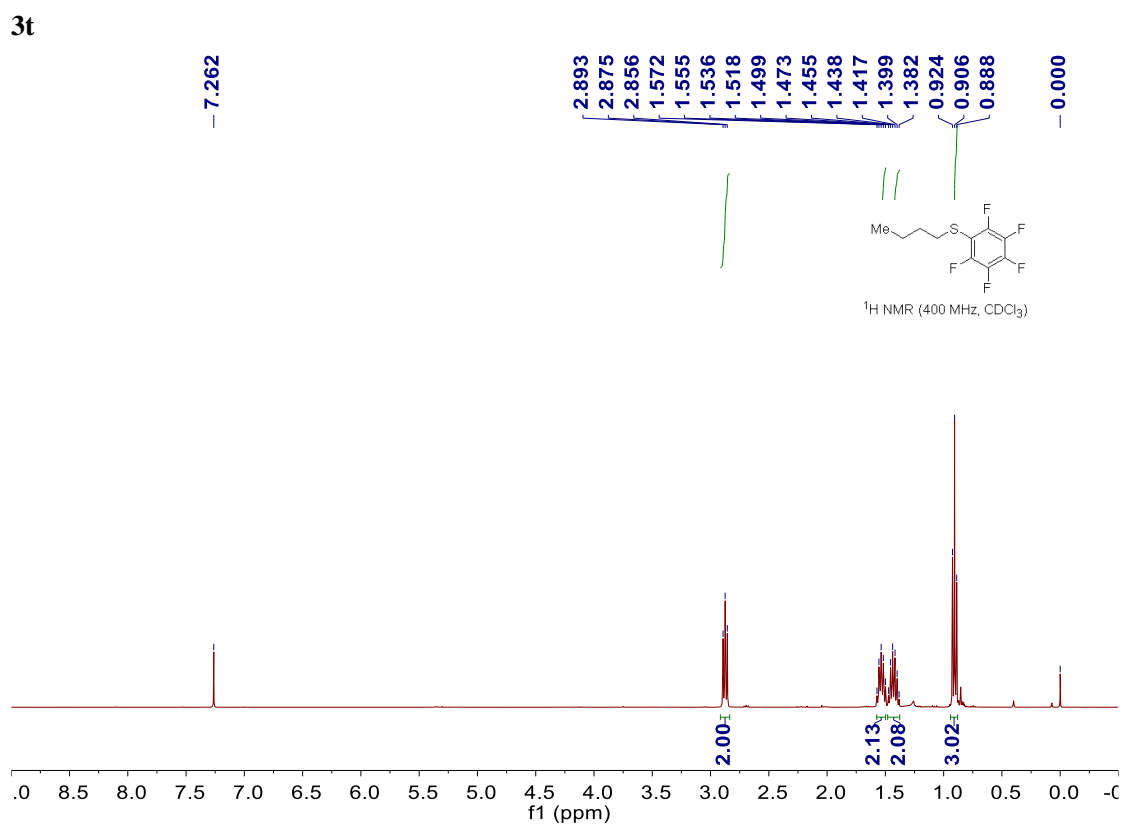

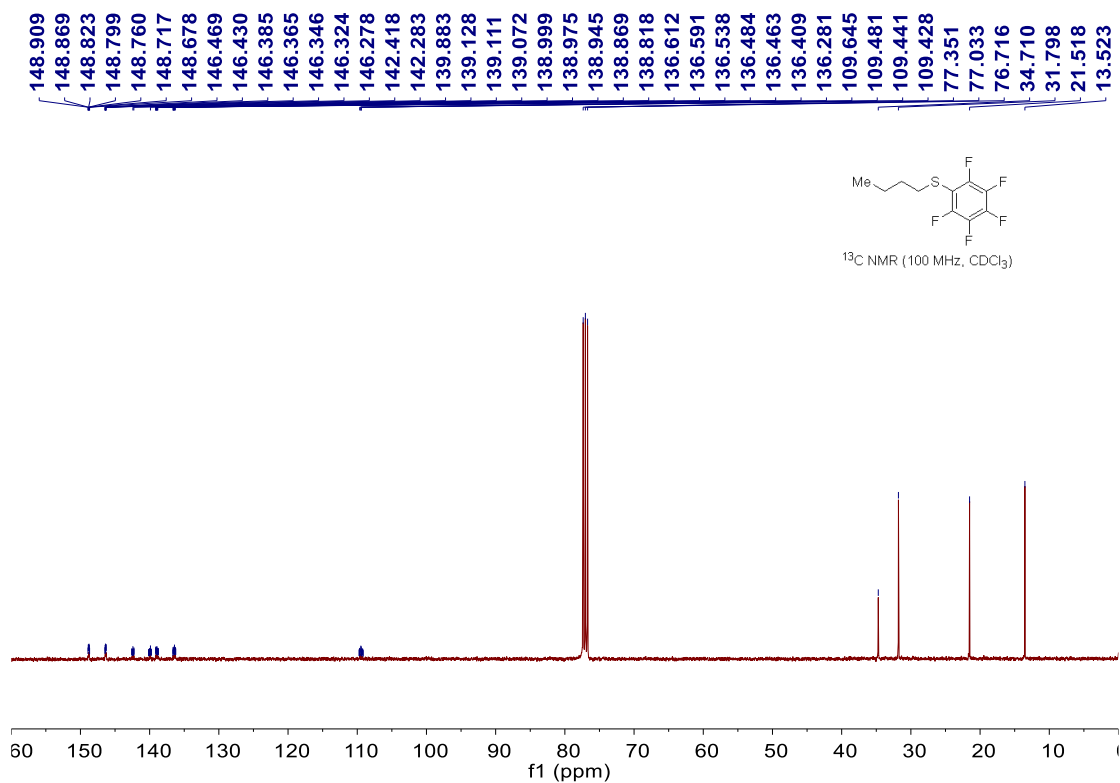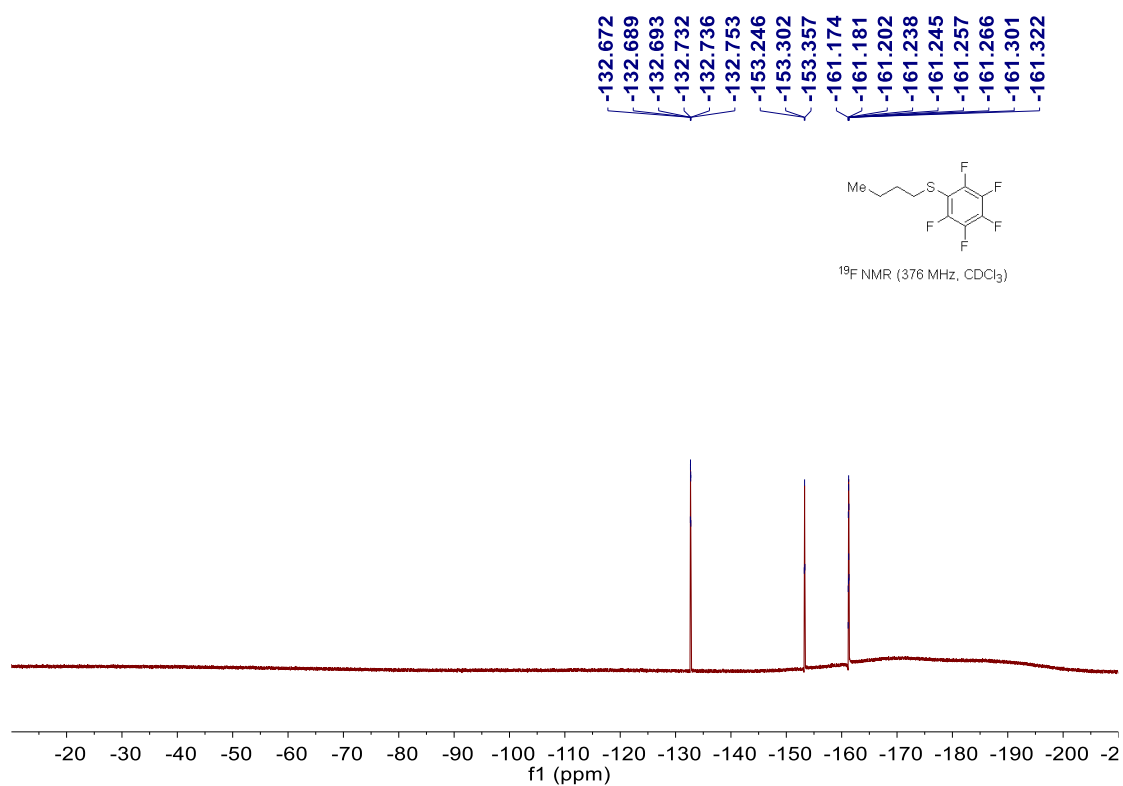

6a

7.404  
7.398  
7.388  
7.384  
7.380  
7.372  
7.363  
7.326  
7.322  
7.316  
7.312  
7.303  
7.299  
7.295  
7.289  
7.285  
7.278  
7.273  
7.254

0.000

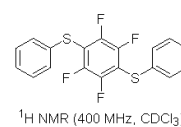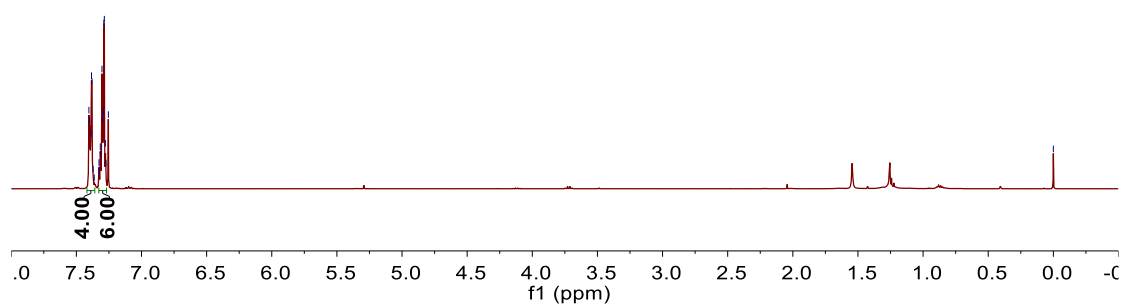

148.35  
148.33  
148.28  
148.26  
148.25  
148.23  
148.19  
148.16  
148.12  
148.07  
145.83  
145.81  
145.77  
145.73  
145.70  
145.67  
145.65  
145.60  
145.56  
132.56  
130.98  
129.39  
128.08  
115.41  
115.40  
115.37  
115.35  
115.32  
115.30  
115.28  
115.26  
115.21  
115.19  
115.17  
115.14  
77.33  
77.01  
76.70

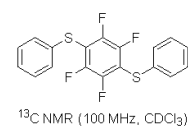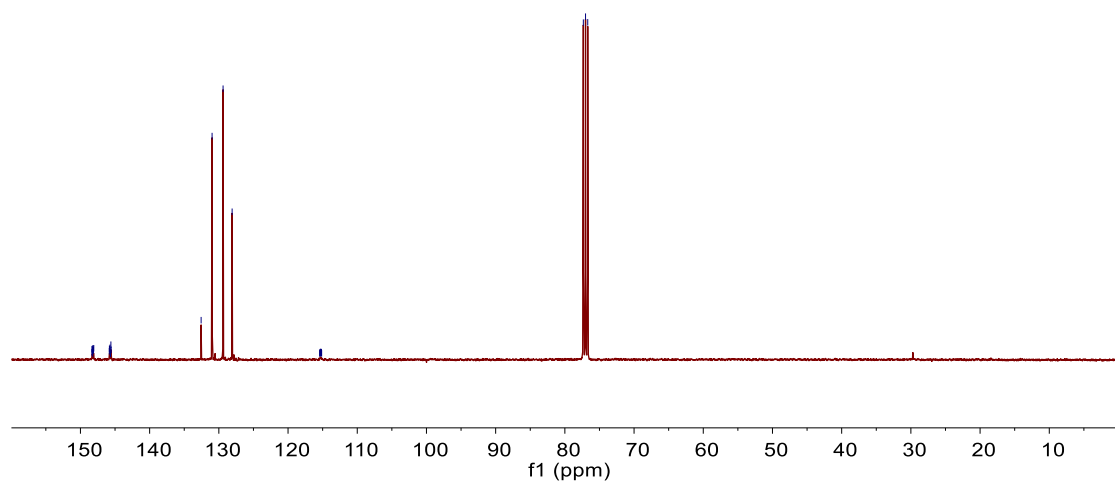



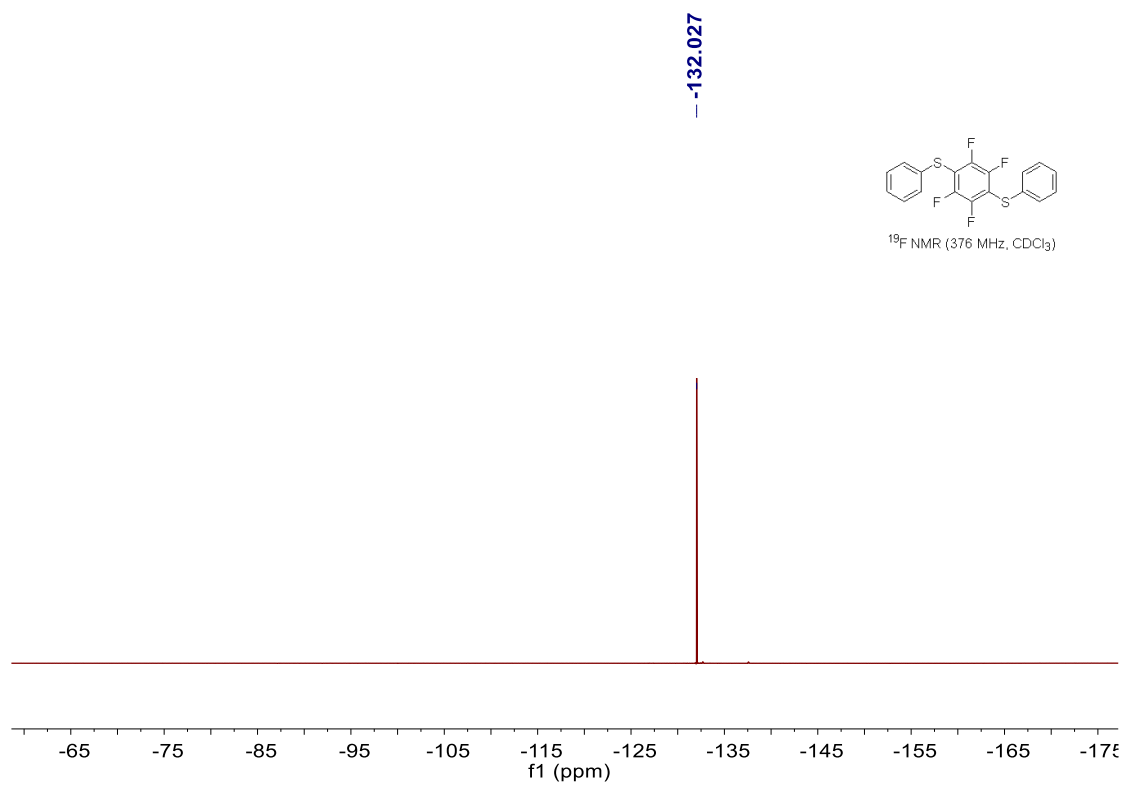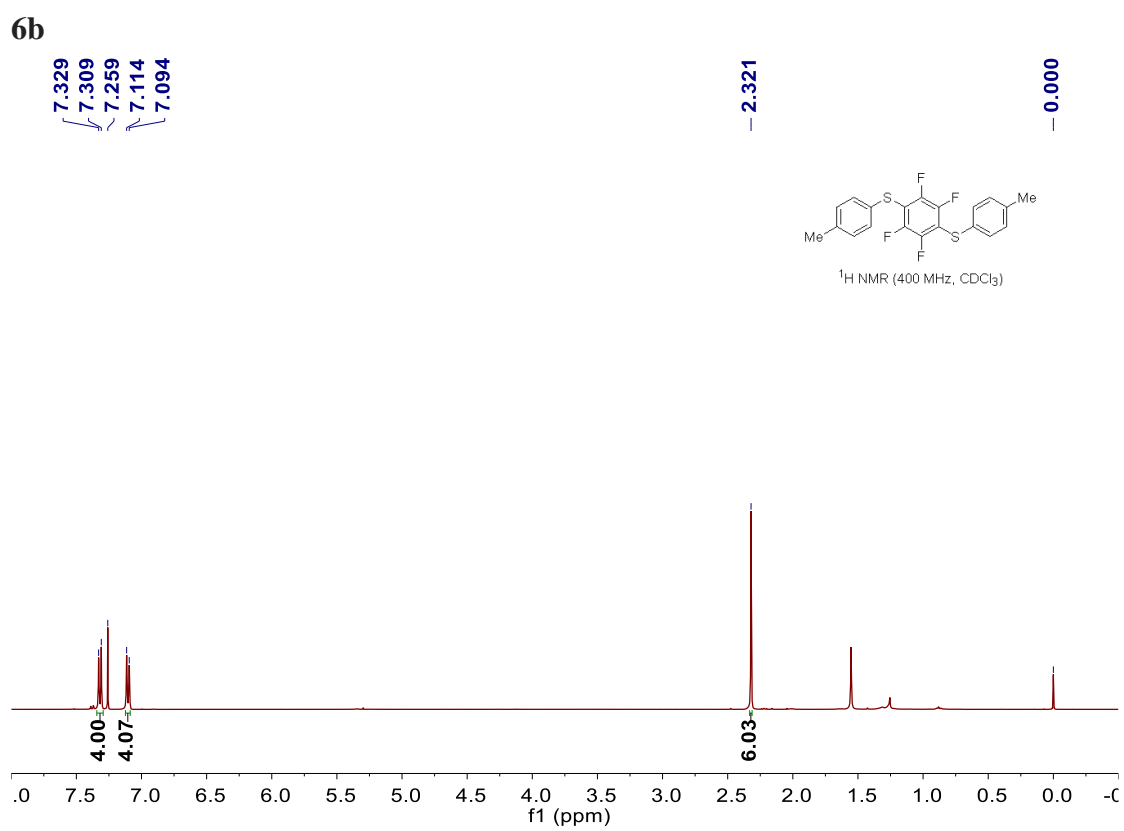

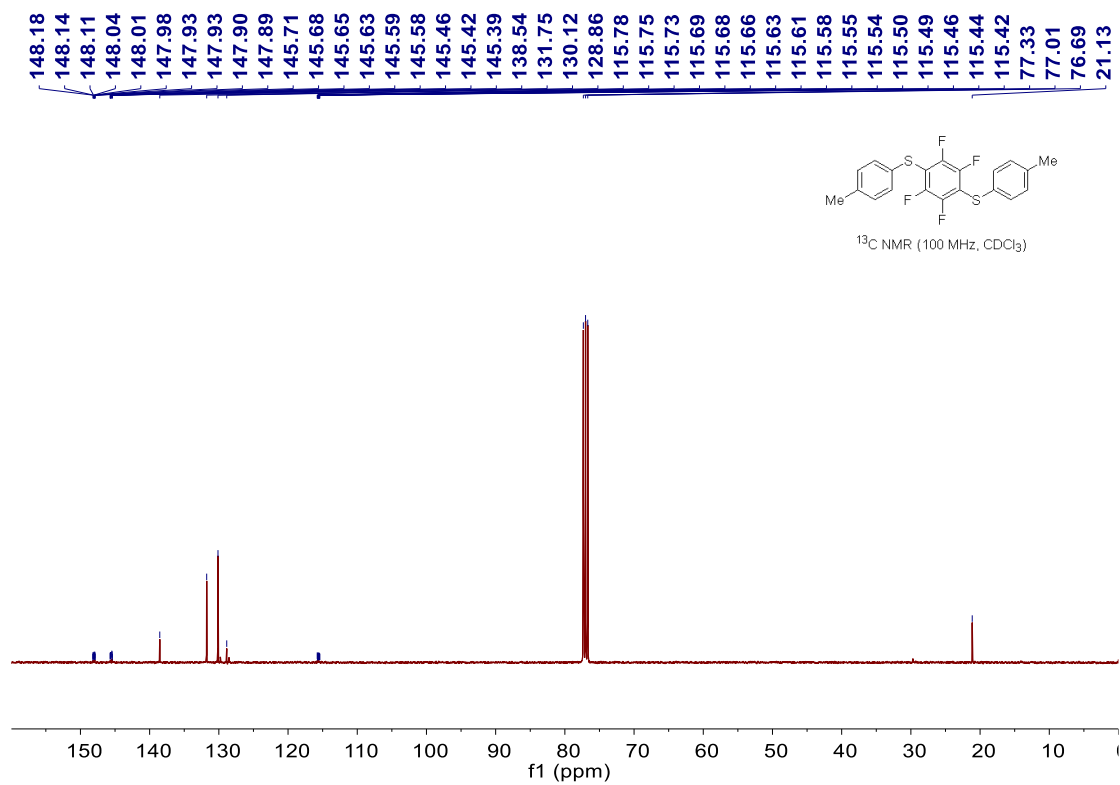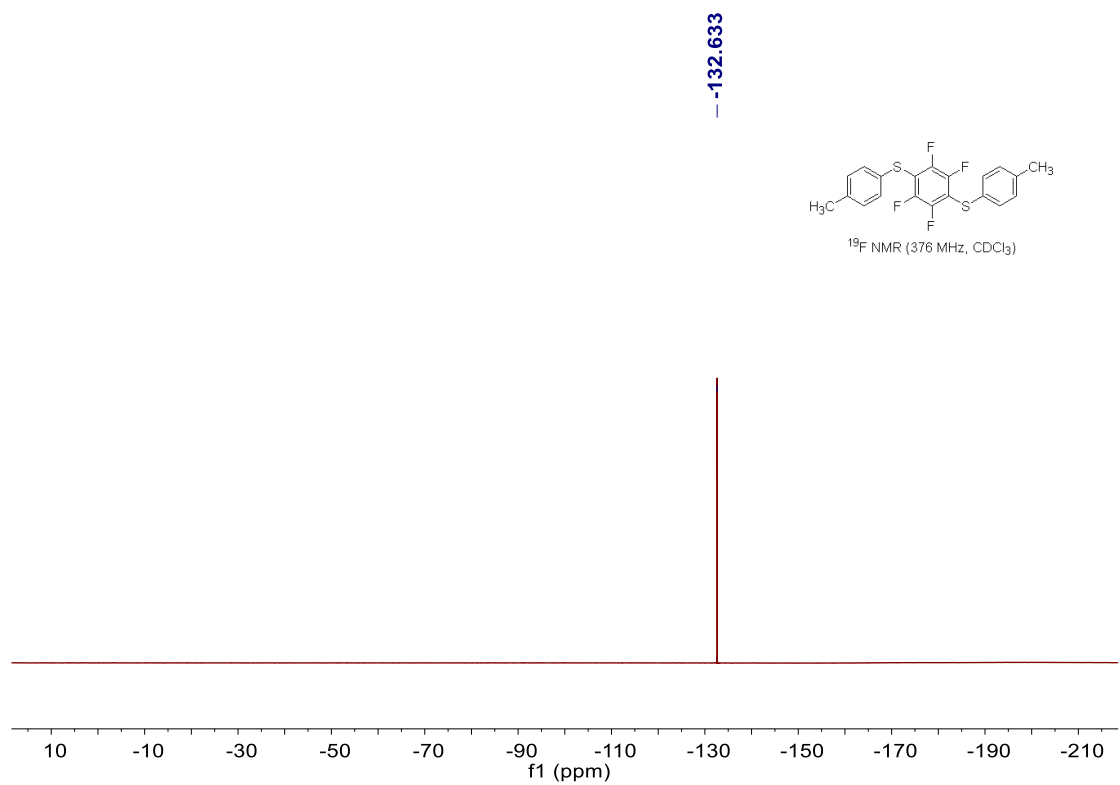

6c

7.361  
7.355  
7.350  
7.339  
7.334  
7.328  
7.295  
7.289  
7.284  
7.273  
7.267  
7.260

0.000

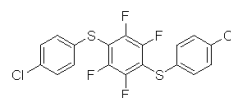

<sup>1</sup>H NMR (400 MHz, CDCl<sub>3</sub>)

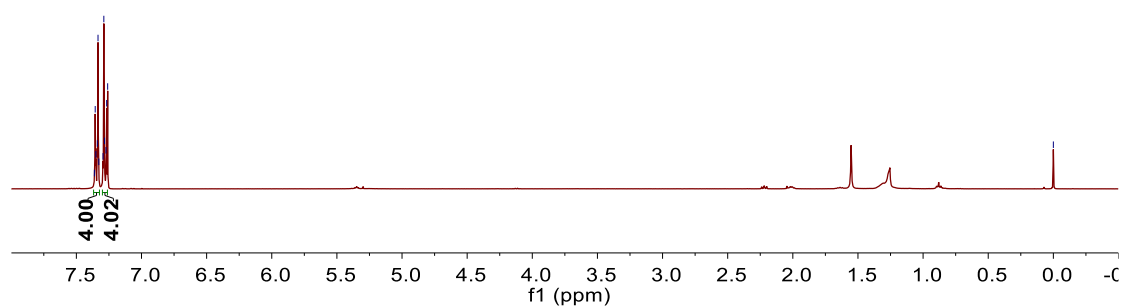

148.22  
148.18  
148.14  
148.08  
148.01  
147.96  
145.70  
145.65  
145.60  
145.56  
145.55  
145.49  
145.44  
134.61  
132.65  
130.76  
129.62  
115.41  
115.37  
115.33  
115.31  
115.28  
115.26  
115.21  
115.19  
115.15  
115.08  
115.03  
114.94  
114.91  
114.87  
114.82  
77.33  
77.01  
76.69

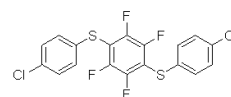

<sup>13</sup>C NMR (100 MHz, CDCl<sub>3</sub>)

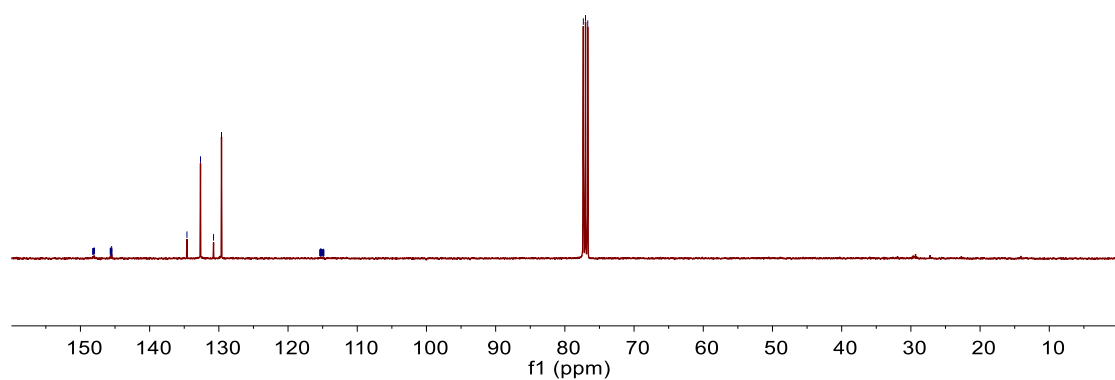

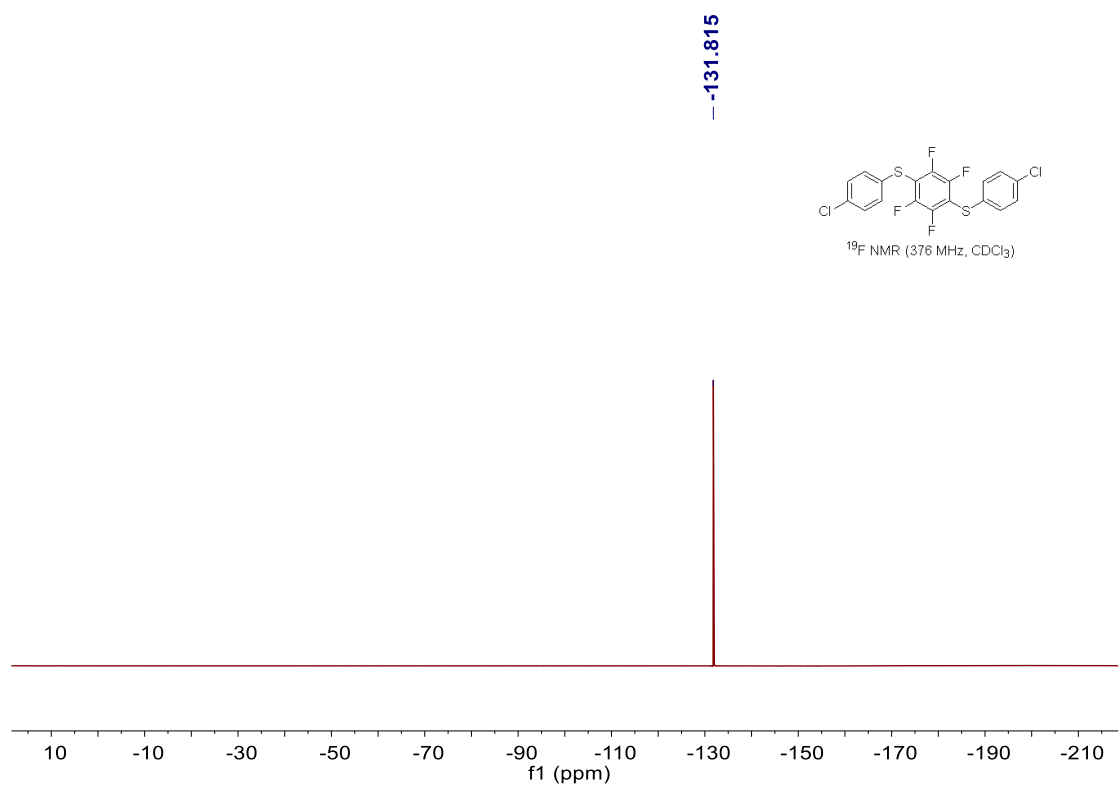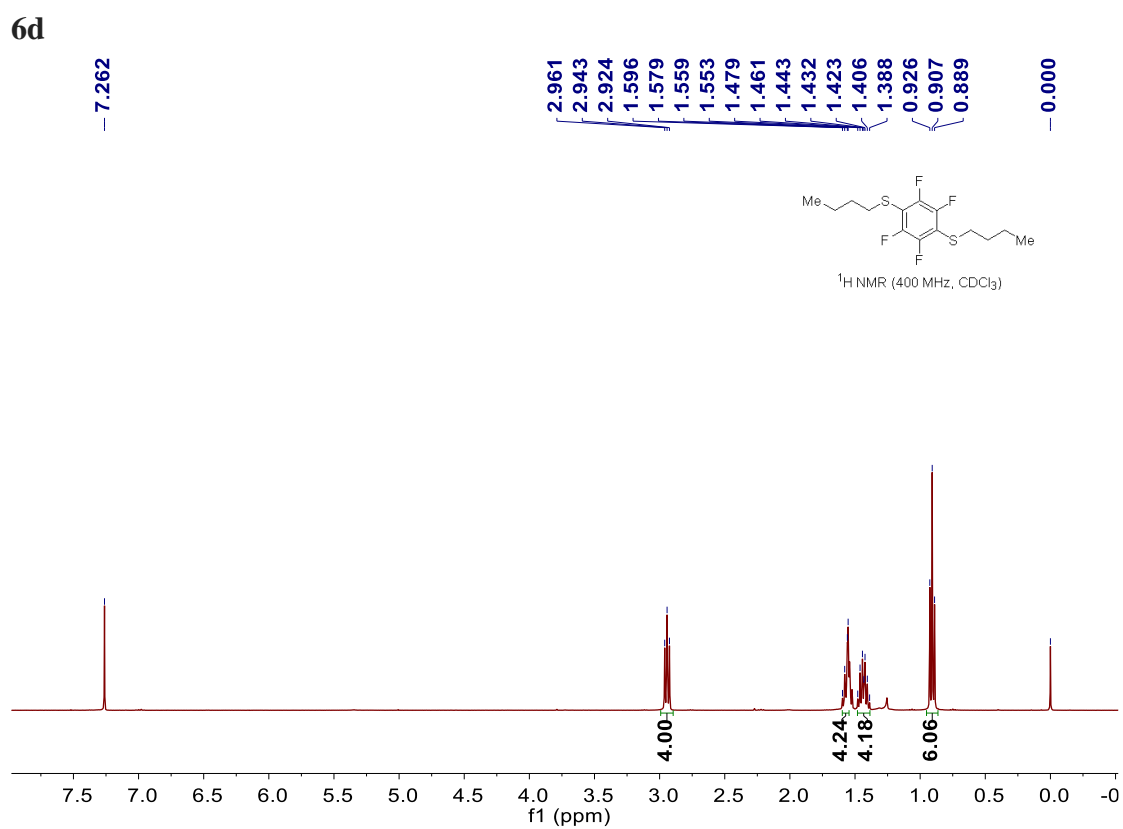

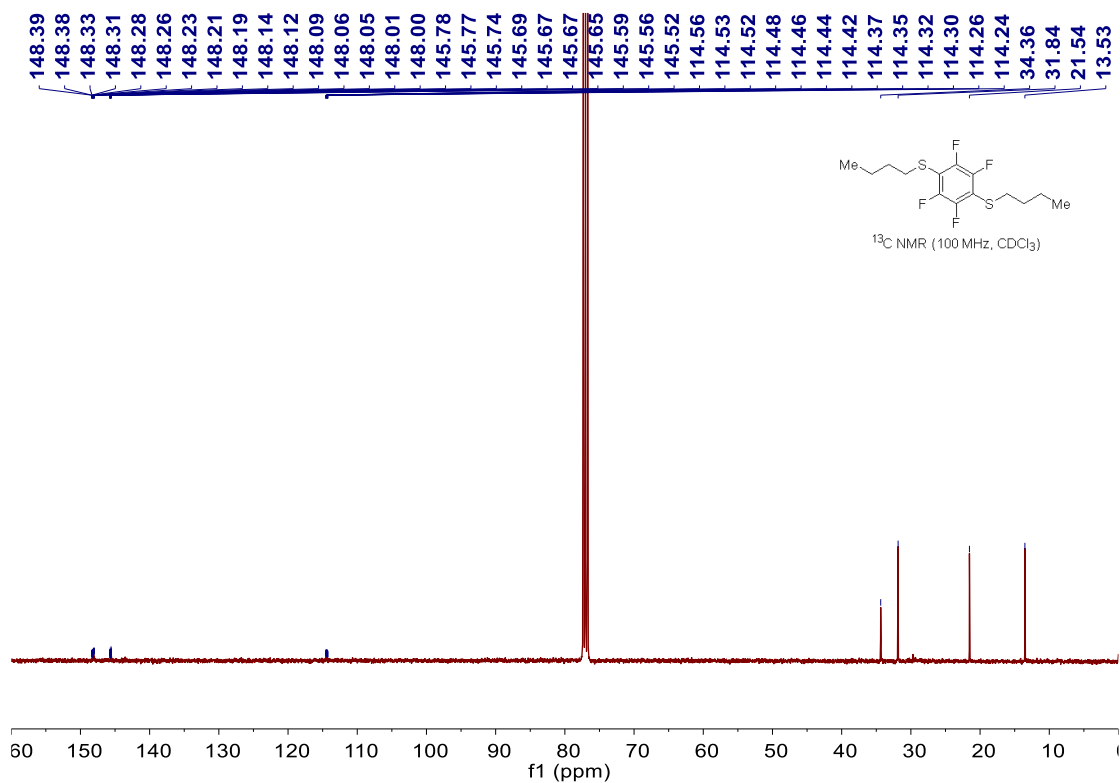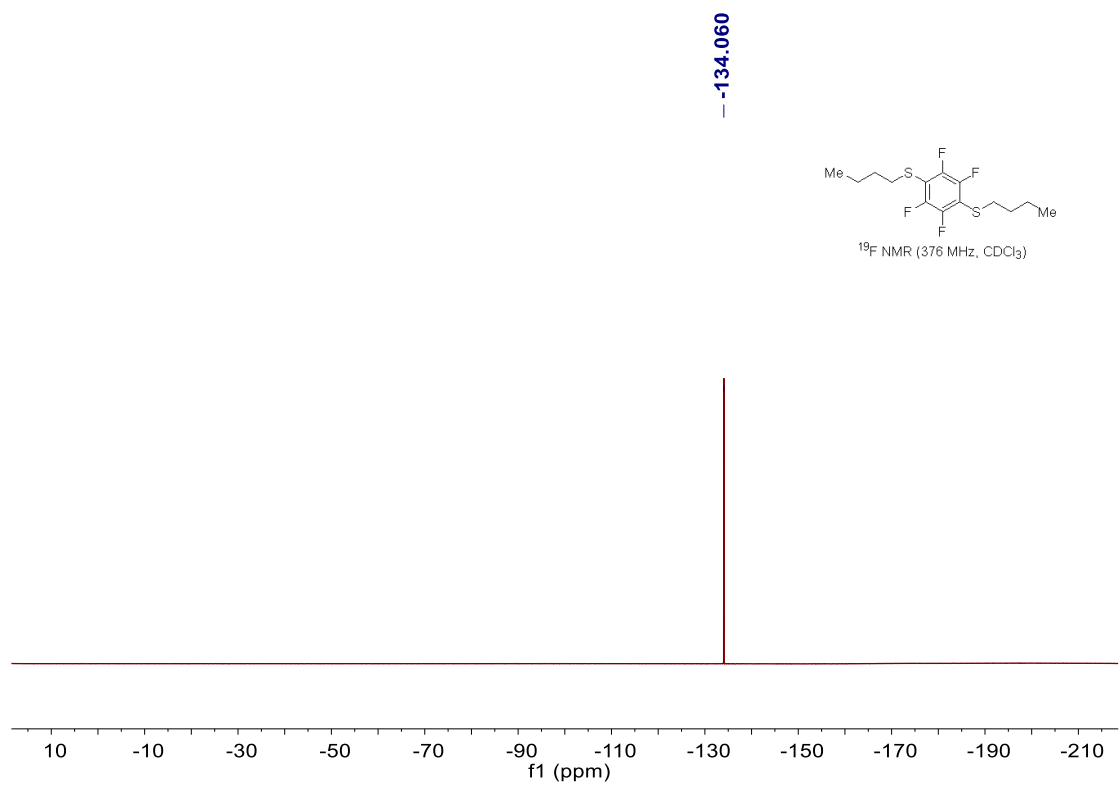

Supplement: d1ob01350e1.pdf [file d1ob01350e1.pdf]
